# Supplementary material for: Oxidative oxygen-nucleophilic bromo-cyclization of alkenyl carbonyl compounds without organic wastes using alkali metal reagents in green solvent
Source: Royal Society of Chemistry journal article supplement (doi:10.1039/c5ra19851h), 2015-01-01

## Supporting Information for

# Oxidative Oxygen-Nucleophilic Bromo-Cyclization of Alkenyl Carbonyl Compounds Without Organic Wastes Using Alkali Metal Reagents in Green Solvent

Katsuhiko Moriyama,<sup>\*†</sup> Chihiro Nishinohara,<sup>†</sup> Toru Sugiue,<sup>†</sup> and Hideo Togo<sup>\*†</sup>

*Department of Chemistry, Graduate School of Science, Chiba University,<sup>†</sup>  
1-33 Yayoi-cho, Inage-ku, Chiba, 263-8522, Japan*

moriyama@faculty.chiba-u.jp, togo@faculty.chiba-u.jp

### Table of contents

|                                                                                                                                                                                                    |       |     |
|----------------------------------------------------------------------------------------------------------------------------------------------------------------------------------------------------|-------|-----|
| 1. General Methods.                                                                                                                                                                                | ----- | S2  |
| 2. General Procedure for Oxidative Bromo-lactonization of Alkenyl Carboxylic Acids ( <b>1</b> ) (Table 1; Entry 15, Table 2; Entry 4, Table 3, and Scheme 1).                                      | ----- | S2  |
| 3. Transformation into $\gamma$ -Azidomethyl Lactone ( <b>3c</b> ) from <b>1c</b> without purification of <b>2c</b> via Oxidative Bromo-lactonization Using KBr and Oxone <sup>®</sup> (Scheme 2). | ----- | S10 |
| 4. General Procedure for Oxidative Bromo-Cyclization of <i>N</i> -Allyl Amides ( <b>4</b> ) (Table 4; Entry 13, and Scheme 3).                                                                     | ----- | S11 |
| 5. <sup>1</sup> H and <sup>13</sup> C NMR Spectra of Materials                                                                                                                                     | ----- | S19 |

**1. General Methods.**  $^1\text{H}$  NMR spectra were measured on a JEOL ECS-400 (400 MHz) spectrometer at ambient temperature. Data were recorded as follows: chemical shift in ppm from internal tetramethylsilane on the  $\delta$  scale, multiplicity (s = singlet; d = doublet; t = triplet; q = quartet; sep = septet; m = multiplet; br = broad), coupling constant (Hz), integration, and assignment.  $^{13}\text{C}$  NMR spectra were measured on a JEOL ECS-400 (100 MHz) spectrometer. Chemical shifts were recorded in ppm from the solvent resonance employed as the internal standard (deuteriochloroform at 77.0 ppm). High-resolution mass spectra were recorded by Thermo Fisher Scientific Exactive Orbitrap mass spectrometers. Infrared (IR) spectra were recorded on a JASCO FT/IR 4100 spectrometer. Single crystal X-ray diffraction data were collected at 173K on a Bruker SMART APEX II CCD diffractometer with Mo  $K\alpha$  ( $\lambda = 0.71073$ ) radiation and graphite monochromator. For thin-layer chromatography (TLC) analysis throughout this work, Merck precoated TLC plates (silica gel 60GF254 0.25 mm) were used. The products were purified by neutral column chromatography on silica gel (Kanto Chemical Co., Inc. silica gel 60N, Prod. No. 37560-84; Merck silica gel 60, Prod. No. 1.09385.9929). Visualization was accomplished by UV light (254 nm), anisaldehyde,  $\text{KMnO}_4$ , and phosphomolybdic acid. In experiments that required dry solvents were distilled in prior to use.

**2. General Procedure for Oxidative Bromo-lactonization of Alkenyl Carboxylic Acids (1) (Table 1; Entry 15, Table 2; Entry 4, Table 3, and Scheme 1).**

To a solution of **1a** (25.1 mg, 0.25 mmol) and KBr (44.7 mg, 0.375 mmol) in AcOEt (1.0 mL) was added Oxone<sup>®</sup> (184.4 mg, 0.30 mmol) at  $-10\text{ }^\circ\text{C}$ . After stirring at  $-10\text{ }^\circ\text{C}$  for 30 h, saturated  $\text{Na}_2\text{SO}_3$  aqueous solution (10 mL) was added to the reaction mixture, and the product was extracted with AcOEt (15 mL  $\times$  3). The combined extracts were washed with brine (10 mL) and dried over  $\text{Na}_2\text{SO}_4$ . The organic phase was concentrated under reduced pressure and the crude product was purified by silica gel column chromatography (eluent: hexane/AcOEt = 2/1) to give desired product **2a** (47.3 mg, 98%).

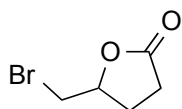

**5-(Bromomethyl)dihydrofuran-2(3H)-one (2a):**  $^1\text{H}$  NMR (400 MHz,  $\text{CDCl}_3$ )  $\delta$  2.13 (dddd,  $J = 13.0, 10.3, 8.0, 6.6$  Hz, 1H), 2.45 (dddd,  $J = 13.0, 9.8, 7.3, 5.7$  Hz, 1H), 2.57 (ddd,  $J = 18.1, 9.8, 8.0$  Hz, 1H), 2.67 (ddd,  $J = 18.1, 10.3, 5.7$  Hz, 1H), 3.54 (dd,  $J = 11.0, 6.0$  Hz, 1H), 3.58 (dd,  $J = 11.0, 4.4$  Hz, 1H), 4.69-4.75 (m, 1H).  $^{13}\text{C}$  NMR (100 MHz,  $\text{CDCl}_3$ )  $\delta$  26.2, 28.3, 34.0, 77.8, 176.1. IR (neat) 2927, 1768, 1420, 1337, 1160, 1020  $\text{cm}^{-1}$ . MS (APCI) calcd for  $\text{C}_5\text{H}_8\text{BrO}_2$   $[\text{M}+\text{H}]^+$  178.9702, found 178.9701.

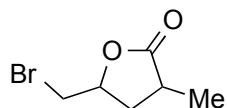

**5-(Bromomethyl)-3-methyldihydrofuran-2(3H)-one (2b):** (*cis*-isomer)  $^1\text{H}$  NMR (400 MHz,  $\text{CDCl}_3$ )  $\delta$  1.31 (d,  $J = 7.1$  Hz, 3H), 1.65-1.78 (m, 1H), 2.64 (ddd,  $J = 12.8, 9.1, 6.1$  Hz, 1H), 2.69-2.83 (m, 1H), 3.51 (dd,  $J = 11.0, 6.3$  Hz, 1H), 3.59 (dd,  $J = 11.0, 4.8$  Hz, 1H), 4.52-4.63 (m, 1H).  $^{13}\text{C}$  NMR (100 MHz,  $\text{CDCl}_3$ )  $\delta$  15.0, 33.3, 35.5, 35.6, 75.9, 178.4. IR (neat) 2973, 1766, 1454, 1344, 1154, 1014  $\text{cm}^{-1}$ . MS (APCI) calcd for  $\text{C}_6\text{H}_{10}\text{BrO}_2$   $[\text{M}+\text{H}]^+$  192.9859, found 192.9861. (*trans*-isomer)  $^1\text{H}$  NMR (400 MHz,  $\text{CDCl}_3$ )  $\delta$  1.31 (d,  $J = 7.6$  Hz, 3H), 2.10 (dt,  $J = 13.8, 8.5$  Hz, 1H), 2.41 (ddd,  $J = 13.8, 9.7, 4.0$  Hz, 1H), 2.77-2.90 (m, 1H), 3.50 (dd,  $J = 11.0, 6.2$  Hz, 1H), 3.55 (dd,  $J = 11.0, 4.5$  Hz, 1H), 4.71-4.80 (m, 1H).  $^{13}\text{C}$  NMR (100 MHz,  $\text{CDCl}_3$ )  $\delta$  16.1, 33.8 (2C), 33.9, 75.7, 179.1. IR (neat) 2973, 1766, 1455, 1343, 1158, 1012  $\text{cm}^{-1}$ . MS (APCI) calcd for  $\text{C}_6\text{H}_{10}\text{BrO}_2$   $[\text{M}+\text{H}]^+$  192.9859, found 192.9868.

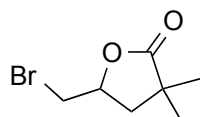

**5-(Bromomethyl)-3,3-dimethyldihydrofuran-2(3H)-one (2c):**  $^1\text{H}$  NMR (400 MHz,  $\text{CDCl}_3$ )  $\delta$  1.29 (s, 3H), 1.32 (s, 3H), 1.94 (dd,  $J = 13.3, 9.6$  Hz, 1H), 2.28 (dd,  $J = 13.3, 6.4$  Hz, 1H), 3.48 (dd,  $J = 10.8, 6.4$  Hz, 1H), 3.58 (dd,  $J = 10.8, 4.8$  Hz, 1H), 4.64 (dtd,  $J = 9.6, 6.4, 4.8$  Hz, 1H).  $^{13}\text{C}$  NMR (100 MHz,  $\text{CDCl}_3$ )  $\delta$  24.86, 24.89, 33.5, 40.5, 41.9, 74.6, 180.9. IR (neat) 2970, 1766, 1457, 1336, 1204, 1107, 1015  $\text{cm}^{-1}$ . MS (APCI) calcd for  $\text{C}_7\text{H}_{12}\text{BrO}_2$   $[\text{M}+\text{H}]^+$  207.0015, found 207.0012.

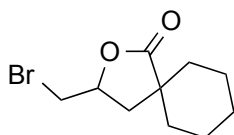

**3-(Bromomethyl)-2-oxaspiro[4.5]decan-1-one (2d):**  $^1\text{H}$  NMR (400 MHz,  $\text{CDCl}_3$ )  $\delta$  1.18-1.44 (m, 3H), 1.49-1.84 (m, 8H), 2.44 (dd,  $J = 13.3, 6.8$  Hz, 1H), 3.47 (dd,  $J = 10.8, 6.6$  Hz, 1H), 3.56 (dd,  $J = 10.8, 4.6$  Hz, 1H), 4.55-4.64 (m, 1H).  $^{13}\text{C}$  NMR (100 MHz,  $\text{CDCl}_3$ )  $\delta$  21.97, 22.05, 25.1, 32.1, 33.9, 34.0, 38.0, 44.9, 74.9, 180.5. IR (neat) 2930, 1761, 1448, 1338, 1186, 1019  $\text{cm}^{-1}$ . MS (APCI) calcd for  $\text{C}_{10}\text{H}_{16}\text{BrO}_2$   $[\text{M}+\text{H}]^+$  247.0328, found 247.0323.

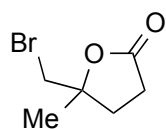

**5-(Bromomethyl)-5-methyldihydrofuran-2(3H)-one (2e):**  $^1\text{H}$  NMR (400 MHz,  $\text{CDCl}_3$ )  $\delta$  1.58 (s, 3H), 2.09 (ddd,  $J = 13.5, 10.3, 7.1$  Hz, 1H), 2.39 (ddd,  $J = 13.5, 10.3, 7.1$  Hz, 1H), 2.62 (ddd,  $J = 18.5, 10.3, 7.1$  Hz, 1H), 2.73 (ddd,  $J = 18.5, 10.3, 7.1$  Hz, 1H), 3.48 (d,  $J = 11.0$  Hz, 1H), 3.54 (d,  $J = 11.0$  Hz, 1H).

= 11.0 Hz, 1H).  $^{13}\text{C}$  NMR (100 MHz,  $\text{CDCl}_3$ )  $\delta$  25.4, 29.2, 31.5, 39.4, 84.0, 175.8. IR (neat) 2923, 1767, 1420, 1276, 1164, 1072  $\text{cm}^{-1}$ . MS (APCI) calcd for  $\text{C}_6\text{H}_{10}\text{BrO}_2$   $[\text{M}+\text{H}]^+$  192.9859, found 192.9857.

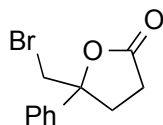

**5-(Bromomethyl)-5-phenyldihydrofuran-2(3H)-one (2f):**  $^1\text{H}$  NMR (400 MHz,  $\text{CDCl}_3$ )  $\delta$  2.48-2.62 (m, 2H), 2.74-2.88 (m, 2H), 3.70 (d,  $J = 11.4$  Hz, 1H), 3.75 (d,  $J = 11.4$  Hz, 1H), 7.32-7.45 (m, 5H).  $^{13}\text{C}$  NMR (100 MHz,  $\text{CDCl}_3$ )  $\delta$  29.0, 32.3, 41.0, 86.4, 124.9 (2C), 128.6, 128.8 (2C), 140.7, 175.5. IR (neat) 2926, 1777, 1447, 1257, 1184, 1038  $\text{cm}^{-1}$ . MS (APCI) calcd for  $\text{C}_{11}\text{H}_{12}\text{BrO}_2$   $[\text{M}+\text{H}]^+$  255.0015, found 255.0010.

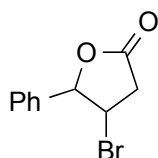

**4-Bromo-5-phenyldihydrofuran-2(3H)-one (2g):**  $^1\text{H}$  NMR (400 MHz,  $\text{CDCl}_3$ )  $\delta$  2.97 (dd,  $J = 18.6, 6.4$  Hz, 1H), 3.23 (dd,  $J = 18.6, 7.6$  Hz, 1H), 4.37 (ddd,  $J = 7.6, 6.4, 5.2$  Hz, 1H), 5.66 (d,  $J = 5.2$  Hz, 1H), 7.34-7.46 (m, 5H).  $^{13}\text{C}$  NMR (100 MHz,  $\text{CDCl}_3$ )  $\delta$  38.7, 45.5, 87.8, 125.3 (2C), 129.0 (2C), 129.3, 135.7, 172.9. IR (neat) 2935, 1789, 1406, 1323, 1210, 1139  $\text{cm}^{-1}$ . MS (ESI) calcd for  $\text{C}_{10}\text{H}_{10}\text{BrO}_2$   $[\text{M}+\text{H}]^+$  240.9859, found 240.9858.

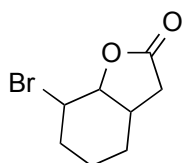

**7-Bromohexahydrobenzofuran-2(3H)-one (2h):**  $^1\text{H}$  NMR (400 MHz,  $\text{CDCl}_3$ )  $\delta$  1.23-1.39 (m, 1H), 1.48-1.61 (m, 1H), 1.73-1.87 (m, 2H), 1.91-2.00 (m, 1H), 2.01-2.11 (m, 1H), 2.29 (dd,  $J = 17.0, 3.4$  Hz, 1H), 2.61 (dd,  $J = 17.0, 7.0$  Hz, 1H), 2.72-2.83 (m, 1H), 4.47 (dt,  $J = 4.4, 4.1$  Hz, 1H), 4.61 (t,  $J = 4.4$  Hz, 1H).  $^{13}\text{C}$  NMR (100 MHz,  $\text{CDCl}_3$ )  $\delta$  18.6, 26.2, 29.4, 32.6, 36.5, 48.4, 81.4, 175.9. IR (neat) 2929, 1778, 1450, 1321, 1172, 1017  $\text{cm}^{-1}$ . MS (APCI) calcd for  $\text{C}_8\text{H}_{12}\text{BrO}_2$   $[\text{M}+\text{H}]^+$  219.0015, found 219.0013.

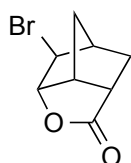

**6-Bromo-2H-3,5-methanocyclopenta[b]furan-2-one (2i):**  $^1\text{H}$  NMR (400 MHz,  $\text{CDCl}_3$ )  $\delta$  1.71-1.78 (m, 1H), 1.81 (dt,  $J = 14.0, 1.8$  Hz, 1H), 2.15 (ddd,  $J = 14.0, 11.4, 4.1$  Hz, 1H),

2.30-2.38 (m, 1H), 2.53-2.61 (m, 1H), 2.65-2.71 (m, 1H), 3.22-3.27 (m, 1H), 3.86 (d,  $J = 2.3$  Hz, 1H), 4.94 (d,  $J = 5.0$  Hz, 1H).  $^{13}\text{C}$  NMR (100 MHz,  $\text{CDCl}_3$ )  $\delta$  34.0, 35.7, 37.5, 45.5, 45.9, 53.4, 87.7, 179.2. IR (neat) 2979, 1782, 1449, 1343, 1170, 1011  $\text{cm}^{-1}$ . MS (APCI) calcd for  $\text{C}_8\text{H}_{10}\text{BrO}_2$   $[\text{M}+\text{H}]^+$  216.9859, found 216.9856.

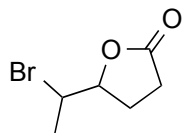

**5-(1-Bromoethyl)dihydrofuran-2(3H)-one (2j):**  $^1\text{H}$  NMR (400 MHz,  $\text{CDCl}_3$ )  $\delta$  1.75 (d,  $J = 7.1$  Hz, 3H), 2.16 (dddd,  $J = 13.3, 10.7, 8.0, 6.6$  Hz, 1H), 2.39 (dddd,  $J = 13.3, 10.7, 8.0, 5.6$  Hz, 1H), 2.56 (ddd,  $J = 18.6, 10.7, 8.0$  Hz, 1H), 2.69 (dd,  $J = 18.6, 10.7, 5.6$  Hz, 1H), 4.21 (qd,  $J = 7.1, 3.7$  Hz, 1H), 4.59 (ddd,  $J = 8.0, 6.6, 3.7$  Hz, 1H).  $^{13}\text{C}$  NMR (100 MHz,  $\text{CDCl}_3$ )  $\delta$  21.2, 25.0, 28.3, 50.3, 81.8, 176.3. IR (neat) 2927, 1771, 1446, 1353, 1154, 1027  $\text{cm}^{-1}$ . MS (APCI) calcd for  $\text{C}_6\text{H}_{10}\text{BrO}_2$   $[\text{M}+\text{H}]^+$  192.9859, found 192.9858.

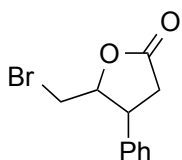

**5-(Bromomethyl)-4-phenyldihydrofuran-2(3H)-one (2k):** (*cis*-isomer)  $^1\text{H}$  NMR (400 MHz,  $\text{CDCl}_3$ )  $\delta$  2.87 (dd,  $J = 18.1, 3.9$  Hz, 1H), 2.99 (dd,  $J = 11.0, 6.6$  Hz, 1H), 3.07 (dd,  $J = 18.1, 9.0$  Hz, 1H), 3.24 (dd,  $J = 11.0, 6.6$  Hz, 1H), 3.90 (ddd,  $J = 9.0, 6.6, 3.9$  Hz, 1H), 4.96 (q,  $J = 6.6$  Hz, 1H), 7.18-7.24 (m, 2H), 7.31-7.42 (m, 3H).  $^{13}\text{C}$  NMR (100 MHz,  $\text{CDCl}_3$ )  $\delta$  29.6, 36.2, 43.7, 82.1, 127.9 (2C), 128.2, 129.0 (2C), 136.3, 175.6. IR (neat) 2925, 1775, 1419, 1326, 1142, 1029  $\text{cm}^{-1}$ . MS (APCI) calcd for  $\text{C}_{11}\text{H}_{12}\text{BrO}_2$   $[\text{M}+\text{H}]^+$  255.0015, found 255.0018. (*trans*-isomer)  $^1\text{H}$  NMR (400 MHz,  $\text{CDCl}_3$ )  $\delta$  2.81 (dd,  $J = 18.3, 9.6$  Hz, 1H), 3.08 (dd,  $J = 18.3, 9.6$  Hz, 1H), 3.52 (dd,  $J = 11.7, 4.1$  Hz, 1H), 3.67 (td,  $J = 9.6, 7.6$  Hz, 1H), 3.69 (dd,  $J = 11.8, 4.1$  Hz, 1H), 4.65 (dt,  $J = 7.6, 4.1$  Hz, 1H), 7.24-7.29 (m, 2H), 7.30-7.36 (m, 1H), 7.36-7.43 (m, 2H).  $^{13}\text{C}$  NMR (100 MHz,  $\text{CDCl}_3$ )  $\delta$  32.6, 36.8, 45.1, 84.2, 127.1 (2C), 128.1, 129.4 (2C), 138.6, 174.6. IR (neat) 2925, 1779, 1419, 1329, 1165, 1031  $\text{cm}^{-1}$ . MS (APCI) calcd for  $\text{C}_{11}\text{H}_{12}\text{BrO}_2$   $[\text{M}+\text{H}]^+$  255.0015, found 255.0018.

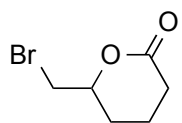

**6-(Bromomethyl)tetrahydro-2H-pyran-2-one (2l):**  $^1\text{H}$  NMR (400 MHz,  $\text{CDCl}_3$ )  $\delta$  1.73 (dtd,  $J = 13.8, 11.2, 5.2$  Hz, 1H), 1.82-1.94 (m, 1H), 1.94-2.06 (m, 1H), 2.08-2.18 (m, 1H), 2.48 (ddd,  $J = 18.1, 9.8, 7.1$  Hz, 1H), 2.57-2.68 (m, 1H), 3.50 (dd,  $J = 11.0, 6.1$  Hz, 1H), 3.55 (dd,  $J = 11.0, 4.6$

Hz, 1H), 4.47-4.57 (m, 1H).  $^{13}\text{C}$  NMR (100 MHz,  $\text{CDCl}_3$ )  $\delta$  18.1, 26.2, 29.3, 33.8, 78.5, 170.3. IR (neat) 2923, 1730, 1442, 1351, 1231, 1164, 1038  $\text{cm}^{-1}$ . MS (APCI) calcd for  $\text{C}_6\text{H}_{10}\text{BrO}_2$   $[\text{M}+\text{H}]^+$  192.9859, found 192.9861.

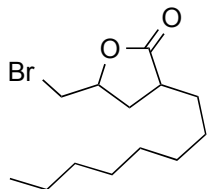

**5-(Bromomethyl)-3-octyldihydrofuran-2(3H)-one (2m):** (*cis*-isomer)  $^1\text{H}$  NMR (400 MHz,  $\text{CDCl}_3$ )  $\delta$  0.88 (t,  $J = 6.8$  Hz, 3H), 1.16-1.53 (m, 13H), 1.65-1.78 (m, 1H), 1.86-1.98 (m, 1H), 2.53-2.72 (m, 2H), 3.49 (dd,  $J = 10.8, 6.6$  Hz, 1H), 3.59 (dd,  $J = 10.8, 4.7$  Hz, 1H), 4.51-4.62 (m, 1H).  $^{13}\text{C}$  NMR (100 MHz,  $\text{CDCl}_3$ )  $\delta$  14.1, 22.6, 27.3, 29.2, 29.29, 29.34, 30.3, 31.8, 33.4, 33.6, 40.7, 76.1, 177.9. IR (neat) 2917, 1756, 1465, 1365, 1164, 1013  $\text{cm}^{-1}$ . MS (APCI) calcd for  $\text{C}_{13}\text{H}_{24}\text{BrO}_2$   $[\text{M}+\text{H}]^+$  291.0954, found 291.0948. (*trans*-isomer)  $^1\text{H}$  NMR (400 MHz,  $\text{CDCl}_3$ )  $\delta$  0.88 (t,  $J = 7.0$  Hz, 3H), 1.17-1.54 (m, 13H), 1.78-1.92 (m, 1H), 2.13 (dt,  $J = 13.5, 8.2$  Hz, 1H), 2.33 (ddd,  $J = 13.5, 9.7, 4.6$  Hz, 1H), 2.66-2.80 (m, 1H), 3.49 (dd,  $J = 11.0, 6.4$  Hz, 1H), 3.54 (dd,  $J = 11.0, 4.4$  Hz, 1H), 4.68-4.77 (m, 1H).  $^{13}\text{C}$  NMR (100 MHz,  $\text{CDCl}_3$ )  $\delta$  14.0, 22.6, 27.1, 29.1, 29.2, 29.3, 31.1, 31.8, 31.9, 34.1, 39.0, 76.0, 178.5. IR (neat) 2923, 1769, 1468, 1338, 1151, 1018  $\text{cm}^{-1}$ . MS (APCI) calcd for  $\text{C}_{13}\text{H}_{24}\text{BrO}_2$   $[\text{M}+\text{H}]^+$  291.0954, found 291.0945.

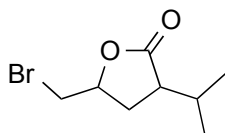

**5-(Bromomethyl)-3-isopropyldihydrofuran-2(3H)-one (2n):** (*cis*-isomer)  $^1\text{H}$  NMR (400 MHz,  $\text{CDCl}_3$ )  $\delta$  0.95 (d,  $J = 7.1$  Hz, 3H), 1.06 (d,  $J = 7.1$  Hz, 3H), 1.72-1.91 (m, 1H), 2.16-2.30 (m, 1H), 2.39 (ddd,  $J = 13.0, 9.3, 6.2$  Hz, 1H), 2.65 (ddd,  $J = 12.4, 9.3, 5.2$  Hz, 1H), 3.49 (dd,  $J = 10.9, 6.6$  Hz, 1H), 3.60 (dd,  $J = 10.9, 4.8$  Hz, 1H), 4.58-4.50 (m, 1H).  $^{13}\text{C}$  NMR (100 MHz,  $\text{CDCl}_3$ )  $\delta$  18.2, 20.5, 27.6, 29.1, 33.4, 46.8, 75.7, 176.9. IR (neat) 2961, 1766, 1467, 1335, 1152, 1011  $\text{cm}^{-1}$ . MS (APCI) calcd for  $\text{C}_8\text{H}_{14}\text{BrO}_2$   $[\text{M}+\text{H}]^+$  221.0172, found 221.0167. (*trans*-isomer)  $^1\text{H}$  NMR (400 MHz,  $\text{CDCl}_3$ )  $\delta$  0.96 (d,  $J = 6.9$  Hz, 3H), 1.04 (d,  $J = 6.9$  Hz, 3H), 1.13-2.30 (m, 3H), 2.70 (ddd,  $J = 10.3, 7.8, 5.1$  Hz, 1H), 3.49 (dd,  $J = 11.0, 6.3$  Hz, 1H), 3.54 (dd,  $J = 11.0, 4.3$  Hz, 1H), 4.64-4.73 (m, 1H).  $^{13}\text{C}$  NMR (100 MHz,  $\text{CDCl}_3$ )  $\delta$  18.3, 20.3, 27.9, 28.9, 34.5, 45.2, 76.1, 177.7. IR (neat) 2962, 1766, 1469, 1334, 1155, 1010  $\text{cm}^{-1}$ . MS (APCI) calcd for  $\text{C}_8\text{H}_{14}\text{BrO}_2$   $[\text{M}+\text{H}]^+$  221.0172, found 221.0167.

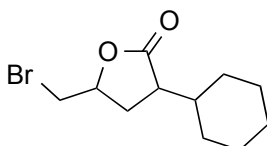

**5-(Bromomethyl)-3-cyclohexyldihydrofuran-2(3H)-one (2o):** (*cis*-isomer)  $^1\text{H}$  NMR (400 MHz,  $\text{CDCl}_3$ )  $\delta$  1.00-1.21 (m, 3H), 1.22-1.38 (m, 2H), 1.52-1.93 (m, 7H), 2.39 (ddd,  $J = 13.0, 9.4, 6.2$  Hz, 1H), 2.63 (ddd,  $J = 12.4, 9.3, 5.0$  Hz, 1H), 3.48 (dd,  $J = 10.8, 6.6$  Hz, 1H), 3.59 (dd,  $J = 10.8, 4.6$  Hz, 1H), 4.48-4.58 (m, 1H).  $^{13}\text{C}$  NMR (100 MHz,  $\text{CDCl}_3$ )  $\delta$  26.0, 26.1, 26.2, 28.5, 29.7, 31.2, 33.4, 37.5, 46.1, 75.8, 176.9. IR (neat) 2924, 1768, 1448, 1339, 1164, 1021  $\text{cm}^{-1}$ . MS (APCI) calcd for  $\text{C}_{11}\text{H}_{18}\text{BrO}_2$   $[\text{M}+\text{H}]^+$  261.0485, found 261.0179. (*trans*-isomer)  $^1\text{H}$  NMR (400 MHz,  $\text{CDCl}_3$ )  $\delta$  1.01-1.21 (m, 3H), 1.21-1.37 (m, 2H), 1.54-1.64 (m, 1H), 1.64-1.72 (m, 1H), 1.72-1.88 (m, 4H), 2.17 (ddd,  $J = 13.9, 10.6, 5.5$  Hz, 1H), 2.27 (ddd,  $J = 13.9, 8.2, 7.3$  Hz, 1H), 2.68 (ddd,  $J = 10.6, 7.3, 5.0$  Hz, 1H), 3.48 (dd,  $J = 11.0, 6.4$  Hz, 1H), 3.53 (dd,  $J = 11.0, 4.5$  Hz, 1H), 4.62-4.72 (m, 1H).  $^{13}\text{C}$  NMR (100 MHz,  $\text{CDCl}_3$ )  $\delta$  26.0 (2C), 26.1, 28.6 (2C), 30.8, 34.4, 38.8, 44.9, 76.3, 177.8. IR (neat) 2924, 1764, 1449, 1340, 1156, 1018  $\text{cm}^{-1}$ . MS (APCI) calcd for  $\text{C}_{11}\text{H}_{18}\text{BrO}_2$   $[\text{M}+\text{H}]^+$  261.0485, found 261.0478.

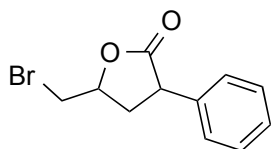

**5-(Bromomethyl)-3-phenyldihydrofuran-2(3H)-one (2p):** (*cis*-isomer)  $^1\text{H}$  NMR (400 MHz,  $\text{CDCl}_3$ )  $\delta$  2.22-2.36 (m, 1H), 2.88 (ddd,  $J = 13.1, 9.4, 6.0$  Hz, 1H), 3.59 (dd,  $J = 11.0, 6.3$  Hz, 1H), 3.66 (dd,  $J = 11.0, 4.6$  Hz, 1H), 3.94 (dd,  $J = 12.6, 9.4$  Hz, 1H), 4.66-4.75 (m, 1H), 7.28-7.35 (m, 3H), 7.35-7.42 (m, 2H).  $^{13}\text{C}$  NMR (100 MHz,  $\text{CDCl}_3$ )  $\delta$  33.1, 36.3, 46.9, 75.7, 127.8, 128.1 (2C), 128.9 (2C), 136.0, 175.7. IR (neat) 2951, 1767, 1450, 1352, 1146, 1015  $\text{cm}^{-1}$ . MS (APPI) calcd for  $\text{C}_{11}\text{H}_{11}\text{BrO}_2$   $[\text{M}]^+$  253.9937, found 253.9936. (*trans*-isomer)  $^1\text{H}$  NMR (400 MHz,  $\text{CDCl}_3$ )  $\delta$  2.58 (dt,  $J = 13.9, 7.8$  Hz, 1H), 2.67 (ddd,  $J = 13.9, 10.1, 5.3$  Hz, 1H), 3.57-3.63 (m, 2H), 4.03 (dd,  $J = 10.1, 7.8$  Hz, 1H), 4.83-4.92 (m, 1H), 7.24-7.34 (m, 3H), 7.34-7.41 (m, 2H).  $^{13}\text{C}$  NMR (100 MHz,  $\text{CDCl}_3$ )  $\delta$  33.9, 34.8, 45.4, 76.1, 127.5 (2C), 127.7, 129.0 (2C), 136.8, 176.3. IR (neat) 2958, 1768, 1452, 1334, 1149, 1011  $\text{cm}^{-1}$ . MS (ESI) calcd for  $\text{C}_{11}\text{H}_{12}\text{BrO}_2$   $[\text{M}+\text{H}]^+$  255.0015, found 255.0019.

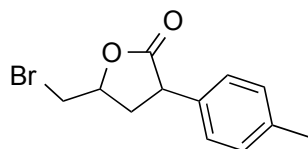

**5-(Bromomethyl)-3-(p-tolyl)dihydrofuran-2(3H)-one (2q):** (*cis*-isomer)  $^1\text{H}$  NMR (400 MHz,  $\text{CDCl}_3$ )  $\delta$  2.26 (td,  $J = 13.0, 10.1$  Hz, 1H), 2.34 (s, 3H), 2.85 (ddd,  $J = 13.0, 9.4, 6.1$  Hz, 1H), 3.58 (dd,  $J = 11.1, 6.1$  Hz, 1H), 3.65 (dd,  $J = 11.1, 4.8$  Hz, 1H), 3.90 (dd,  $J = 13.0, 9.4$  Hz, 1H), 4.64-4.74 (m, 1H), 7.18 (s, 4H).  $^{13}\text{C}$  NMR (100 MHz,  $\text{CDCl}_3$ )  $\delta$  21.1, 33.2, 36.3, 46.5, 75.7, 127.9 (2C), 129.6 (2C), 132.9, 137.6, 175.9. IR (neat) 2922, 1770, 1451, 1335, 1156, 1019  $\text{cm}^{-1}$ . MS

(APCI) calcd for C<sub>12</sub>H<sub>14</sub>BrO<sub>2</sub> [M+H]<sup>+</sup> 269.0172, found 269.0168. (*trans*-isomer) <sup>1</sup>H NMR (400 MHz, CDCl<sub>3</sub>) δ 2.34 (s, 3H), 2.57 (dt, *J* = 13.7, 7.6 Hz, 1H), 2.66 (ddd, *J* = 13.7, 9.8, 5.0 Hz, 1H), 3.59 (dd, *J* = 11.0, 6.0 Hz, 1H), 3.62 (dd, *J* = 11.0, 4.6 Hz, 1H), 4.00 (dd, *J* = 9.8, 7.6 Hz, 1H), 4.82-4.92 (m, 1H), 7.13-7.21 (m, 4H). <sup>13</sup>C NMR (100 MHz, CDCl<sub>3</sub>) δ 21.0, 33.8, 34.9, 45.1, 76.1, 127.4 (2C), 129.7 (2C), 133.8, 137.5, 176.5. IR (neat) 2920, 1770, 1453, 1339, 1150, 1011 cm<sup>-1</sup>. MS (APCI) calcd for C<sub>12</sub>H<sub>14</sub>BrO<sub>2</sub> [M+H]<sup>+</sup> 269.0172, found 269.0172.

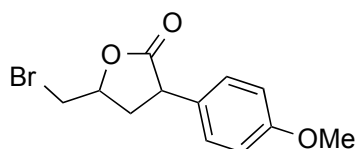

**5-(Bromomethyl)-3-(4-methoxyphenyl)dihydrofuran-2(3H)-one (2r):** (*cis*-isomer) <sup>1</sup>H NMR (400 MHz, CDCl<sub>3</sub>) δ 2.25 (dd, *J* = 13.0, 10.1 Hz, 1H), 2.86 (ddd, *J* = 13.0, 9.3, 6.0 Hz, 1H), 3.59 (dd, *J* = 11.0, 6.4 Hz, 1H), 3.66 (dd, *J* = 11.0, 4.6 Hz, 1H), 3.80 (s, 3H), 3.90 (dd, *J* = 13.0, 9.3 Hz, 1H), 4.65-4.74 (m, 1H), 6.88-6.94 (m, 2H), 7.19-7.25 (m, 2H). <sup>13</sup>C NMR (100 MHz, CDCl<sub>3</sub>) δ 33.2, 36.4, 46.2, 55.3, 75.7, 114.3 (2C), 127.9, 129.1 (2C), 159.1, 176.1. IR (neat) 2932, 1770, 1514, 1455, 1249, 1156, 1019 cm<sup>-1</sup>. MS (APCI) calcd for C<sub>12</sub>H<sub>14</sub>BrO<sub>3</sub> [M+H]<sup>+</sup> 285.0121, found 285.0116. (*trans*-isomer) <sup>1</sup>H NMR (400 MHz, CDCl<sub>3</sub>) δ 2.55 (dt, *J* = 14.0, 8.0 Hz, 1H), 2.66 (ddd, *J* = 14.0, 10.0, 5.0 Hz, 1H), 3.58 (dd, *J* = 11.0, 6.0 Hz, 1H), 3.61 (dd, *J* = 11.0, 4.8 Hz, 1H), 3.80 (s, 3H), 3.99 (dd, *J* = 10.0, 8.0 Hz, 1H), 4.82-4.91 (m, 1H), 6.87-6.93 (m, 2H), 7.16-7.22 (m, 2H). <sup>13</sup>C NMR (100 MHz, CDCl<sub>3</sub>) δ 33.8, 34.9, 44.6, 55.3, 76.1, 114.4 (2C), 128.65 (2C), 128.69, 159.1, 176.7. IR (neat) 2931, 1768, 1513, 1459, 1249, 1150, 1031 cm<sup>-1</sup>. MS (APCI) calcd for C<sub>12</sub>H<sub>14</sub>BrO<sub>3</sub> [M+H]<sup>+</sup> 285.0121, found 285.0121.

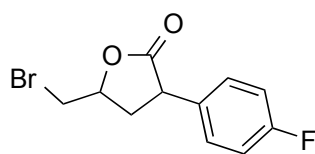

**5-(Bromomethyl)-3-(4-fluorophenyl)dihydrofuran-2(3H)-one (2s):** (*cis*-isomer) <sup>1</sup>H NMR (400 MHz, CDCl<sub>3</sub>) δ 2.26 (td, *J* = 12.7, 10.1 Hz, 1H), 2.89 (ddd, *J* = 13.0, 9.2, 6.0 Hz, 1H), 3.60 (dd, *J* = 11.0, 6.1 Hz, 1H), 3.67 (dd, *J* = 11.0, 4.6 Hz, 1H), 3.94 (dd, *J* = 12.7, 9.2 Hz, 1H), 4.67-4.76 (m, 1H), 7.03-7.12 (m, 2H), 7.24-7.33 (m, 2H). <sup>13</sup>C NMR (100 MHz, CDCl<sub>3</sub>) δ 33.1, 36.3, 46.1, 75.6, 115.9 (d, *J*<sub>C-F</sub> = 21.1 Hz, 2C), 129.7 (d, *J*<sub>C-F</sub> = 8.6 Hz, 2C), 131.7 (d, *J*<sub>C-F</sub> = 2.9 Hz), 162.3 (d, *J*<sub>C-F</sub> = 248.1 Hz), 175.5. IR (neat) 2925, 1770, 1551, 1338, 1225, 1156, 1018 cm<sup>-1</sup>. MS (APCI) calcd for C<sub>11</sub>H<sub>11</sub>BrFO<sub>2</sub> [M+H]<sup>+</sup> 272.9921, found 272.9919. (*trans*-isomer) <sup>1</sup>H NMR (400 MHz, CDCl<sub>3</sub>) δ 2.52-2.60 (m, 1H), 2.66-2.74 (m, 1H), 3.61 (d, *J* = 5.3 Hz, 2H), 4.04 (t, *J* = 9.2 Hz, 1H), 4.84-4.93 (m, 1H), 7.02-7.10 (m, 2H), 7.22-7.30 (m, 2H). <sup>13</sup>C NMR (100 MHz, CDCl<sub>3</sub>) δ 33.9, 34.7, 44.6, 76.0, 116.0 (d, *J*<sub>C-F</sub> = 21.9 Hz, 2C), 129.3 (d, *J*<sub>C-F</sub> = 7.6 Hz, 2C), 132.5, 162.2 (d, *J*<sub>C-F</sub> =



250.8 Hz), 176.3. IR (neat) 2958, 1769, 1510, 1339, 1226, 1152, 1012  $\text{cm}^{-1}$ . MS (APPI) calcd for  $\text{C}_{11}\text{H}_{10}\text{BrFO}_2$   $[\text{M}]^+$  271.9843, found 271.9843.

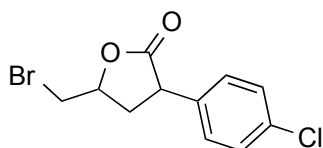

**5-(Bromomethyl)-3-(4-chlorophenyl)dihydrofuran-2(3H)-one (2t):** (*cis*-isomer)  $^1\text{H}$  NMR (400 MHz,  $\text{CDCl}_3$ )  $\delta$  2.26 (td,  $J = 12.7, 10.1$  Hz, 1H), 2.88 (ddd,  $J = 13.0, 9.1, 5.8$  Hz, 1H), 3.60 (dd,  $J = 11.0, 6.2$  Hz, 1H), 3.66 (dd,  $J = 11.0, 4.6$  Hz, 1H), 3.93 (dd,  $J = 12.7, 9.1$  Hz, 1H), 4.67-4.76 (m, 1H), 7.22-7.28 (m, 2H), 7.32-7.39 (m, 2H).  $^{13}\text{C}$  NMR (100 MHz,  $\text{CDCl}_3$ )  $\delta$  33.1, 36.1, 46.2, 75.7, 129.1 (2C), 129.4 (2C), 133.8, 134.4, 175.2. IR (neat) 2925, 1766, 1491, 1342, 1155, 1087, 1014  $\text{cm}^{-1}$ . MS (APCI) calcd for  $\text{C}_{11}\text{H}_{11}\text{BrClO}_2$   $[\text{M}+\text{H}]^+$  288.9625, found 288.9627. (*trans*-isomer)  $^1\text{H}$  NMR (400 MHz,  $\text{CDCl}_3$ )  $\delta$  2.49-2.61 (m, 1H), 2.64-2.75 (m, 1H), 3.57-3.65 (m, 2H), 4.03 (t,  $J = 9.1$  Hz, 1H), 4.84-4.93 (m, 1H), 7.19-7.25 (m, 2H), 7.31-7.38 (m, 2H).  $^{13}\text{C}$  NMR (100 MHz,  $\text{CDCl}_3$ )  $\delta$  33.9, 34.5, 44.7, 76.0, 129.0 (2C), 129.2 (2C), 133.7, 135.2, 176.0. IR (neat) 2958, 1770, 1493, 1340, 1152, 1092, 1013  $\text{cm}^{-1}$ . MS (APPI) calcd for  $\text{C}_{11}\text{H}_{10}\text{BrClO}_2$   $[\text{M}]^+$  287.9547, found 287.9548.

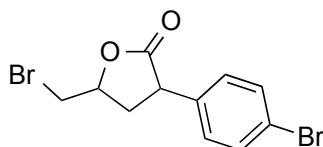

**5-(Bromomethyl)-3-(4-bromophenyl)dihydrofuran-2(3H)-one (2u):** (*cis*-isomer)  $^1\text{H}$  NMR (400 MHz,  $\text{CDCl}_3$ )  $\delta$  2.25 (td,  $J = 12.6, 10.1$  Hz, 1H), 2.88 (ddd,  $J = 13.0, 9.2, 6.0$  Hz, 1H), 3.60 (dd,  $J = 11.0, 6.2$  Hz, 1H), 3.66 (dd,  $J = 11.0, 4.6$  Hz, 1H), 3.91 (dd,  $J = 12.6, 9.2$  Hz, 1H), 4.66-4.76 (m, 1H), 7.15-7.22 (m, 2H), 7.47-7.55 (m, 2H).  $^{13}\text{C}$  NMR (100 MHz,  $\text{CDCl}_3$ )  $\delta$  33.0, 36.0, 46.3, 75.7, 121.9, 129.7 (2C), 132.1 (2C), 134.9, 175.1. IR (neat) 2920, 1766, 1488, 1341, 1153, 1010  $\text{cm}^{-1}$ . MS (ESI) calcd for  $\text{C}_{11}\text{H}_{10}\text{Br}_2\text{O}_2\text{Na}$   $[\text{M}+\text{Na}]^+$  354.8940, found 354.8934. (*trans*-isomer)  $^1\text{H}$  NMR (400 MHz,  $\text{CDCl}_3$ )  $\delta$  2.55 (dtd,  $J = 13.7, 8.2, 1.3$  Hz, 1H), 2.64-2.75 (m, 1H), 3.58-3.65 (m, 2H), 4.02 (dd,  $J = 10.0, 8.2$  Hz, 1H), 4.83-4.92 (m, 1H), 7.17 (d,  $J = 8.7$  Hz, 2H), 7.50 (d,  $J = 8.7$  Hz, 2H).  $^{13}\text{C}$  NMR (100 MHz,  $\text{CDCl}_3$ )  $\delta$  33.8, 34.5, 44.8, 76.0, 121.9, 129.3 (2C), 132.2 (2C), 135.7, 175.8. IR (neat) 2962, 1771, 1489, 1339, 1151, 1010  $\text{cm}^{-1}$ . MS (APCI) calcd for  $\text{C}_{11}\text{H}_{10}\text{Br}_2\text{O}_2$   $[\text{M}]^+$  331.9042, found 331.9046.

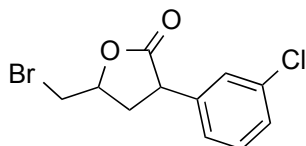

**5-(Bromomethyl)-3-(3-chlorophenyl)dihydrofuran-2(3H)-one (2v):** (*cis*-isomer)  $^1\text{H}$  NMR (400 MHz,  $\text{CDCl}_3$ )  $\delta$  2.27 (td,  $J = 13.0, 10.2$  Hz, 1H), 2.89 (ddd,  $J = 13.0, 9.2, 6.0$  Hz, 1H), 3.61 (dd,  $J = 11.0, 6.2$  Hz, 1H), 3.67 (dd,  $J = 11.0, 4.3$  Hz, 1H), 3.93 (dd,  $J = 12.6, 9.2$  Hz, 1H), 4.72 (dtd,  $J = 10.2, 6.1, 4.3$  Hz, 1H), 7.18-7.24 (m, 1H), 7.27-7.35 (m, 3H).  $^{13}\text{C}$  NMR (100 MHz,  $\text{CDCl}_3$ )  $\delta$  33.0, 36.0, 46.4, 75.7, 126.3, 128.1, 128.3, 130.2, 134.7, 137.8, 175.0. IR (neat) 2925, 1773, 1479, 1342, 1157, 1019  $\text{cm}^{-1}$ . MS (APCI) calcd for  $\text{C}_{11}\text{H}_{11}\text{BrClO}_2$   $[\text{M}+\text{H}]^+$  288.9625, found 288.9617. (*trans*-isomer)  $^1\text{H}$  NMR (400 MHz,  $\text{CDCl}_3$ )  $\delta$  2.56 (dd,  $J = 13.7, 8.2$  Hz, 1H), 2.69 (ddd,  $J = 13.7, 10.1, 4.6$  Hz, 1H), 3.34 (d,  $J = 5.3$  Hz, 2H), 4.03 (dd,  $J = 10.1, 8.2$  Hz, 1H), 4.84-4.93 (m, 1H), 7.14-7.20 (m, 1H), 7.25-7.34 (m, 3H).  $^{13}\text{C}$  NMR (100 MHz,  $\text{CDCl}_3$ )  $\delta$  33.9, 34.4, 44.9, 76.0, 125.8, 127.8, 128.0, 130.3, 134.8, 138.6, 175.7. IR (neat) 2967, 1771, 1478, 1340, 1151, 1012  $\text{cm}^{-1}$ . MS (APCI) calcd for  $\text{C}_{11}\text{H}_{10}\text{BrClO}_2$   $[\text{M}]^+$  287.9547, found 287.9553.

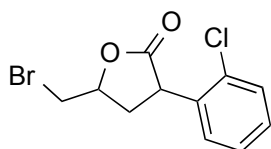

**5-(Bromomethyl)-3-(2-chlorophenyl)dihydrofuran-2(3H)-one (2w):** (*cis*-isomer)  $^1\text{H}$  NMR (400 MHz,  $\text{CDCl}_3$ )  $\delta$  2.19 (td,  $J = 13.0, 10.1$  Hz, 1H), 2.95 (ddd,  $J = 13.0, 9.6, 6.2$  Hz, 1H), 3.60 (dd,  $J = 11.0, 6.4$  Hz, 1H), 3.68 (dd,  $J = 11.0, 4.6$  Hz, 1H), 4.37 (dd,  $J = 13.0, 9.6$  Hz, 1H), 4.71-4.82 (m, 1H), 7.24-7.34 (m, 3H), 7.39-7.45 (m, 1H).  $^{13}\text{C}$  NMR (100 MHz,  $\text{CDCl}_3$ )  $\delta$  33.0, 35.5, 45.1, 76.0, 127.5, 129.3, 129.8, 129.9, 134.0, 134.3, 174.9. IR (neat) 2922, 1762, 1421, 1347, 1177, 1025  $\text{cm}^{-1}$ . MS (APCI) calcd for  $\text{C}_{11}\text{H}_{11}\text{BrClO}_2$   $[\text{M}+\text{H}]^+$  288.9625, found 288.9621. (*trans*-isomer)  $^1\text{H}$  NMR (400 MHz,  $\text{CDCl}_3$ )  $\delta$  2.52 (dt,  $J = 13.8, 8.7$  Hz, 1H), 2.73 (ddd,  $J = 13.8, 10.7, 4.3$  Hz, 1H), 3.61 (dd,  $J = 11.2, 4.1$  Hz, 1H), 3.66 (dd,  $J = 11.2, 5.7$  Hz, 1H), 4.38 (dd,  $J = 10.7, 8.7$  Hz, 1H), 4.86-4.97 (m, 1H), 7.22-7.32 (m, 3H), 7.39-7.46 (m, 1H).  $^{13}\text{C}$  NMR (100 MHz,  $\text{CDCl}_3$ )  $\delta$  33.9, 34.3, 44.3, 76.0, 127.5, 129.3, 129.7, 130.1, 133.7, 135.1, 175.8. IR (neat) 2962, 1772, 1476, 1343, 1153, 1012  $\text{cm}^{-1}$ . MS (APCI) calcd for  $\text{C}_{11}\text{H}_{11}\text{BrClO}_2$   $[\text{M}+\text{H}]^+$  288.9625, found 288.9624.

### 3. Transformation into $\gamma$ -Azidomethyl Lactone (3c) from 1c without purification of 2c via Oxidative Bromo-lactonization Using KBr and Oxone<sup>®</sup> (Scheme 2).

To a solution of **1c** (32.1 mg, 0.25 mmol) and KBr (44.6 mg, 0.375 mmol) in AcOEt (1.0 mL) was added Oxone<sup>®</sup> (184.4 mg, 0.30 mmol) at  $-10$  °C. After stirring at  $-10$  °C for 12 h, the reaction mixture was filtered through Celite with AcOEt to remove the precipitate. The filtrate was concentrated under reduced pressure and the crude product was dissolved with MeCN (1.2 mL). 15-Crown-5-ether (10  $\mu\text{L}$ , 0.05 mmol) and  $\text{NaN}_3$  (32.5 mg, 0.50 mmol) were added to the solution at room temperature under argon atmosphere. After stirring at 90 °C for 6 h,  $\text{NaN}_3$  (8.2 mg, 0.125

mmol) was again added to the reaction mixture. After stirring at 90 °C for 18 h, the reaction mixture was cooled to room temperature, and the suspension was filtered through Celite with AcOEt. The filtrate was concentrated under reduced pressure and the crude product was purified by silica gel column chromatography (eluent: hexane/AcOEt = 3/1) to give desired product **3c** (37.6 mg, 89%).

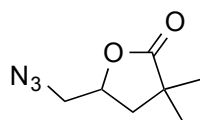

**5-(Azidomethyl)-3,3-dimethyldihydrofuran-2(3H)-one (3c):** <sup>1</sup>H NMR (400 MHz, CDCl<sub>3</sub>) δ 1.29 (s, 3H), 1.32 (s, 3H), 1.94 (dd, *J* = 12.9, 9.8 Hz, 1H), 2.13 (dd, *J* = 12.9, 6.5 Hz, 1H), 3.44 (dd, *J* = 13.5, 5.5 Hz, 1H), 3.58 (dd, *J* = 13.5, 3.9 Hz, 1H), 4.54-4.63 (m, 1H). <sup>13</sup>C NMR (100 MHz, CDCl<sub>3</sub>) δ 24.7, 24.9, 39.7, 40.1, 53.8, 74.7, 180.9. IR (neat) 2971, 2099, 1767, 1458, 1281, 1204, 1121, 1050 cm<sup>-1</sup>. MS (APCI) calcd for C<sub>7</sub>H<sub>12</sub>N<sub>3</sub>O<sub>2</sub> [M+H]<sup>+</sup> 170.0930, found 170.0922.

#### 4. General Procedure for Oxidative Bromo-Cyclization of *N*-Allyl Amides (**4**) (Table 4; Entry 13, and Scheme 3).

To a solution of **4a** (59.4 mg, 0.25 mmol) and KBr (35.7 mg, 0.30 mmol) in AcOEt (1.0 mL) was added Oxone<sup>®</sup> (153.7 mg, 0.25 mmol) at room temperature. After stirring at room temperature for 13 h, saturated Na<sub>2</sub>SO<sub>3</sub> aqueous solution (10 mL) was added to the reaction mixture, and the product was extracted with AcOEt (15 mL × 3). The combined extracts were washed with brine (10 mL) and dried over Na<sub>2</sub>SO<sub>4</sub>. The organic phase was concentrated under reduced pressure and the crude product was purified by silica gel column chromatography (eluent: hexane/AcOEt = 3/1) to give desired product **5a** (72.7 mg, 92%).

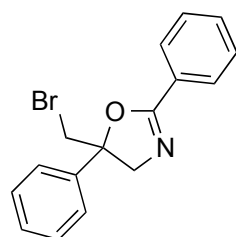

**5-(Bromomethyl)-2,5-diphenyl-4,5-dihydrooxazole (5a):** <sup>1</sup>H NMR (400 MHz, CDCl<sub>3</sub>) δ 3.77 (d, *J* = 11.4 Hz, 1H), 3.85 (d, *J* = 11.4 Hz, 1H), 4.28 (d, *J* = 15.1 Hz, 1H), 4.50 (d, *J* = 15.1 Hz, 1H), 7.30-7.57 (m, 8H), 8.03-8.09 (m, 2H). <sup>13</sup>C NMR (100 MHz, CDCl<sub>3</sub>) δ 40.1, 65.9, 87.0, 124.9 (2C), 127.4, 128.3 (3C), 128.4 (2C), 128.8 (2C), 131.6, 141.7, 162.9. IR (neat) 1656, 1446, 1345, 1270, 1065, 1021 cm<sup>-1</sup>. MS (ESI) calcd for C<sub>16</sub>H<sub>15</sub>BrNO [M+H]<sup>+</sup> 316.0332, found 316.0327.

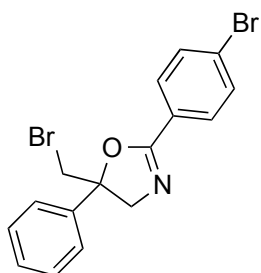

**5-(Bromomethyl)-2-(4-bromophenyl)-5-phenyl-4,5-dihydrooxazole (5b):**  $^1\text{H}$  NMR (400 MHz,  $\text{CDCl}_3$ )  $\delta$  3.75 (d,  $J = 11.2$  Hz, 1H), 3.83 (d,  $J = 11.2$  Hz, 1H), 4.27 (d,  $J = 15.1$  Hz, 1H), 4.48 (d,  $J = 15.1$  Hz, 1H), 7.31-7.39 (m, 1H), 7.39-7.44 (m, 4H), 7.56-7.62 (m, 2H), 7.88-7.95 (m, 2H).  $^{13}\text{C}$  NMR (100 MHz,  $\text{CDCl}_3$ )  $\delta$  40.1, 65.9, 87.2, 124.8 (2C), 126.3, 128.4 (2C), 128.8 (2C), 129.8 (2C), 131.7 (2C), 141.5, 162.1. IR (neat) 1655, 1486, 1345, 1268, 1079, 1010  $\text{cm}^{-1}$ . MS (ESI) calcd for  $\text{C}_{16}\text{H}_{14}\text{Br}_2\text{NO}$   $[\text{M}+\text{H}]^+$  393.9437, found 393.9439.

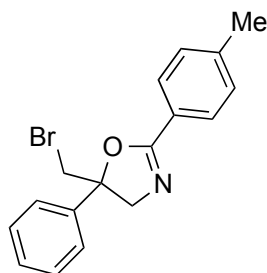

**5-(Bromomethyl)-5-phenyl-2-(p-tolyl)-4,5-dihydrooxazole (5c):**  $^1\text{H}$  NMR (400 MHz,  $\text{CDCl}_3$ )  $\delta$  2.41 (s, 3H), 3.76 (d,  $J = 8.9$  Hz, 1H), 3.83 (d,  $J = 8.9$  Hz, 1H), 4.26 (d,  $J = 11.9$  Hz, 1H), 4.47 (d,  $J = 11.9$  Hz, 1H), 7.26 (d,  $J = 6.4$  Hz, 2H), 7.30-7.35 (m, 1H), 7.36-7.45 (m, 4H), 7.94 (d,  $J = 6.4$  Hz, 2H).  $^{13}\text{C}$  NMR (100 MHz,  $\text{CDCl}_3$ )  $\delta$  21.6, 40.1, 65.8, 86.8, 124.6, 124.9 (2C), 128.2 (3C), 128.7 (2C), 141.8, 142.0, 162.9. IR (neat) 1653, 1447, 1346, 1269, 1077, 1018  $\text{cm}^{-1}$ . MS (ESI) calcd for  $\text{C}_{17}\text{H}_{17}\text{BrNO}$   $[\text{M}+\text{H}]^+$  330.0488, found 330.0487.

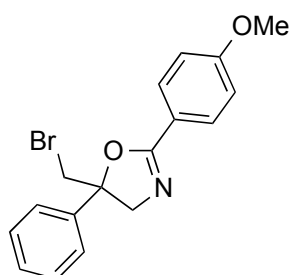

**5-(Bromomethyl)-2-(4-methoxyphenyl)-5-phenyl-4,5-dihydrooxazole (5d):**  $^1\text{H}$  NMR (400 MHz,  $\text{CDCl}_3$ )  $\delta$  3.76 (d,  $J = 11.2$  Hz, 1H), 3.82 (d,  $J = 11.2$  Hz, 1H), 3.85 (s, 3H), 4.24 (d,  $J = 14.9$  Hz, 1H), 4.45 (d,  $J = 14.9$  Hz, 1H), 6.91-6.98 (m, 2H), 7.28-7.45 (m, 5H), 7.95-8.02 (m, 2H).  $^{13}\text{C}$  NMR (100 MHz,  $\text{CDCl}_3$ )  $\delta$  40.1, 55.4, 65.8, 86.8, 113.8 (2C), 119.9, 124.9 (2C), 128.2, 128.7 (2C), 130.0 (2C), 141.8, 162.3, 162.7. IR (neat) 1647, 1606, 1510, 1444, 1348, 1254, 1167, 1020  $\text{cm}^{-1}$ . MS (ESI) calcd for  $\text{C}_{17}\text{H}_{17}\text{BrNO}_2$   $[\text{M}+\text{H}]^+$  346.0437, found 346.0436.

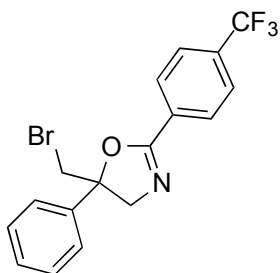

**5-(Bromomethyl)-5-phenyl-2-(4-(trifluoromethyl)phenyl)-4,5-dihydrooxazole (5e):**  $^1\text{H}$  NMR (400 MHz,  $\text{CDCl}_3$ )  $\delta$  3.77 (d,  $J = 11.5$  Hz, 1H), 3.85 (d,  $J = 11.5$  Hz, 1H), 4.32 (d,  $J = 15.4$  Hz, 1H), 4.54 (d,  $J = 15.4$  Hz, 1H), 7.32-7.45 (m, 5H), 7.72 (d,  $J = 8.3$  Hz, 2H), 8.17 (d,  $J = 8.3$  Hz, 2H).  $^{13}\text{C}$  NMR (100 MHz,  $\text{CDCl}_3$ )  $\delta$  40.0, 65.9, 87.5, 123.7 (q,  $J_{\text{C-F}} = 274.0$  Hz), 124.8 (2C), 125.4 (q,  $J_{\text{C-F}} = 3.8$  Hz, 2C), 128.5, 128.6 (2C), 128.9 (2C), 131.0, 133.2 (q,  $J_{\text{C-F}} = 32.6$  Hz), 141.4, 161.7. IR (neat) 1657, 1448, 1321, 1272, 1125, 1084, 1016  $\text{cm}^{-1}$ . MS (ESI) calcd for  $\text{C}_{17}\text{H}_{14}\text{BrF}_3\text{NO}$   $[\text{M}+\text{H}]^+$  384.0205, found 384.0204.

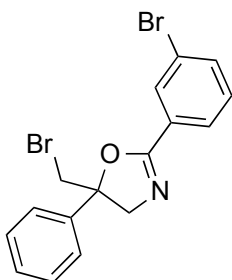

**5-(Bromomethyl)-2-(3-bromophenyl)-5-phenyl-4,5-dihydrooxazole (5f):**  $^1\text{H}$  NMR (400 MHz,  $\text{CDCl}_3$ )  $\delta$  3.74 (d,  $J = 11.3$  Hz, 1H), 3.83 (d,  $J = 11.3$  Hz, 1H), 4.28 (d,  $J = 15.2$  Hz, 1H), 4.50 (d,  $J = 15.2$  Hz, 1H), 7.29-7.44 (m, 6H), 7.61-7.66 (m, 1H), 7.97 (dt,  $J = 7.8, 1.8$  Hz, 1H), 8.19 (t,  $J = 1.8$  Hz, 1H).  $^{13}\text{C}$  NMR (100 MHz,  $\text{CDCl}_3$ )  $\delta$  40.0, 65.8, 87.4, 122.5, 124.8 (2C), 126.8, 128.4, 128.8 (2C), 129.3, 130.0, 131.2, 134.5, 141.4, 161.6. IR (neat) 1653, 1561, 1478, 1346, 1257, 1064  $\text{cm}^{-1}$ . MS (ESI) calcd for  $\text{C}_{16}\text{H}_{14}\text{Br}_2\text{NO}$   $[\text{M}+\text{H}]^+$  393.9437, found 393.9437.

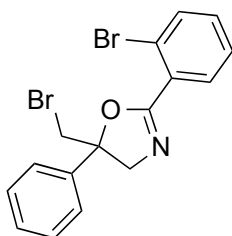

**5-(Bromomethyl)-2-(2-bromophenyl)-5-phenyl-4,5-dihydrooxazole (5g):**  $^1\text{H}$  NMR (400 MHz,  $\text{CDCl}_3$ )  $\delta$  3.76 (d,  $J = 11.2$  Hz, 1H), 3.84 (d,  $J = 11.2$  Hz, 1H), 4.34 (d,  $J = 15.1$  Hz, 1H), 4.56 (d,  $J = 15.1$  Hz, 1H), 7.29-7.49 (m, 7H), 7.68 (dd,  $J = 6.8, 1.4$  Hz, 1H), 7.85 (dd,  $J = 7.8, 1.8$  Hz, 1H).  $^{13}\text{C}$  NMR (100 MHz,  $\text{CDCl}_3$ )  $\delta$  40.3, 65.9, 87.4, 121.8, 125.1 (2C), 127.2, 128.3, 128.8 (2C), 129.2, 131.6, 131.8, 134.0, 141.4, 162.1. IR (neat) 1658, 1434, 1343, 1249, 1095, 1020  $\text{cm}^{-1}$ .

MS (ESI) calcd for C<sub>16</sub>H<sub>14</sub>Br<sub>2</sub>NO [M+H]<sup>+</sup> 393.9437, found 393.9438.

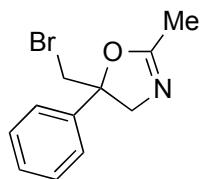

**5-(Bromomethyl)-2-methyl-5-phenyl-4,5-dihydrooxazole (5h):** <sup>1</sup>H NMR (400 MHz, CDCl<sub>3</sub>) δ 2.10 (t, *J* = 1.3 Hz, 3H), 3.65 (d, *J* = 11.3 Hz, 1H), 3.71 (d, *J* = 11.3 Hz, 1H), 4.04 (dd, *J* = 14.4, 1.3 Hz, 1H), 4.24 (dd, *J* = 14.4, 1.3 Hz, 1H), 7.30-7.43 (m, 5H). <sup>13</sup>C NMR (100 MHz, CDCl<sub>3</sub>) δ 14.0, 40.3, 65.4, 86.8, 124.9 (2C), 128.2, 128.7 (2C), 141.7, 163.9. IR (neat) 3286, 1641, 1539, 1446, 1285, 1110, 1046 cm<sup>-1</sup>. MS (ESI) calcd for C<sub>11</sub>H<sub>13</sub>BrNO [M+H]<sup>+</sup> 254.0175, found 254.0173.

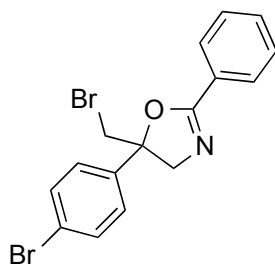

**5-(Bromomethyl)-5-(4-bromophenyl)-2-phenyl-4,5-dihydrooxazole (5i):** <sup>1</sup>H NMR (400 MHz, CDCl<sub>3</sub>) δ 3.74 (d, *J* = 11.4 Hz, 1H), 3.80 (d, *J* = 11.4 Hz, 1H), 4.23 (d, *J* = 15.2 Hz, 1H), 4.48 (d, *J* = 15.2 Hz, 1H), 7.28-7.36 (m, 2H), 7.42-7.50 (m, 2H), 7.50-7.58 (m, 3H), 8.00-8.08 (m, 2H). <sup>13</sup>C NMR (100 MHz, CDCl<sub>3</sub>) δ 39.5, 65.9, 86.6, 122.4, 126.7 (2C), 127.2, 128.3 (2C), 128.5 (2C), 131.7, 131.9 (2C), 140.7, 162.8. IR (neat) 1647, 1486, 1345, 1260, 1063, 1007 cm<sup>-1</sup>. MS (ESI) calcd for C<sub>16</sub>H<sub>14</sub>Br<sub>2</sub>NO [M+H]<sup>+</sup> 393.9437, found 393.9432.

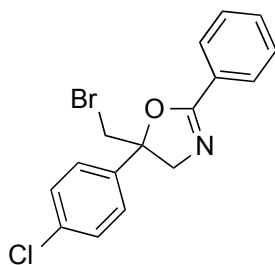

**5-(Bromomethyl)-5-(4-chlorophenyl)-2-phenyl-4,5-dihydrooxazole (5j):** <sup>1</sup>H NMR (400 MHz, CDCl<sub>3</sub>) δ 3.74 (d, *J* = 11.4 Hz, 1H), 3.80 (d, *J* = 11.4 Hz, 1H), 4.23 (d, *J* = 15.4 Hz, 1H), 4.48 (d, *J* = 15.4 Hz, 1H), 7.38 (s, 4H), 7.43-7.50 (m, 2H), 7.50-7.56 (m, 1H), 8.01-8.07 (m, 2H). <sup>13</sup>C NMR (100 MHz, CDCl<sub>3</sub>) δ 39.6, 65.9, 86.6, 126.4 (2C), 127.2, 128.2 (2C), 128.5 (2C), 128.9 (2C), 131.7, 134.2, 140.2, 162.8. IR (neat) 1649, 1490, 1345, 1261, 1065, 1011 cm<sup>-1</sup>. MS (ESI) calcd for C<sub>16</sub>H<sub>14</sub>BrClNO [M+H]<sup>+</sup> 349.9942, found 349.9936.

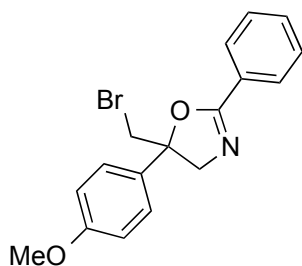

**5-(Bromomethyl)-5-(4-methoxyphenyl)-2-phenyl-4,5-dihydrooxazole (5k):**  $^1\text{H}$  NMR (400 MHz,  $\text{CDCl}_3$ )  $\delta$  3.74 (d,  $J = 11.5$  Hz, 1H), 3.81 (s, 3H), 3.82 (d,  $J = 11.5$  Hz, 1H), 4.26 (d,  $J = 15.1$  Hz, 1H), 4.47 (d,  $J = 15.1$  Hz, 1H), 6.88-6.96 (m, 2H), 7.32-7.39 (m, 2H), 7.42-7.48 (m, 2H), 7.48-7.55 (m, 1H), 8.01-8.08 (m, 2H).  $^{13}\text{C}$  NMR (100 MHz,  $\text{CDCl}_3$ )  $\delta$  40.2, 55.3, 65.8, 86.8, 114.1 (2C), 126.2 (2C), 127.5, 128.2 (2C), 128.4 (2C), 131.5, 133.6, 159.4, 162.8. IR (neat) 1644, 1611, 1510, 1346, 1250, 1184, 1021  $\text{cm}^{-1}$ . MS (ESI) calcd for  $\text{C}_{17}\text{H}_{17}\text{BrNO}_2$   $[\text{M}+\text{H}]^+$  346.0437, found 346.0428.

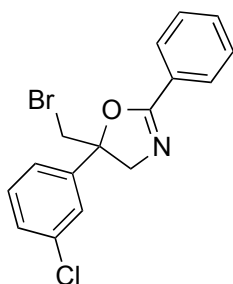

**5-(Bromomethyl)-5-(3-chlorophenyl)-2-phenyl-4,5-dihydrooxazole (5l):**  $^1\text{H}$  NMR (400 MHz,  $\text{CDCl}_3$ )  $\delta$  3.74 (d,  $J = 11.3$  Hz, 1H), 3.80 (d,  $J = 11.3$  Hz, 1H), 4.24 (d,  $J = 15.2$  Hz, 1H), 4.47 (d,  $J = 15.2$  Hz, 1H), 7.24-7.37 (m, 3H), 7.40-7.56 (m, 4H), 8.01-8.08 (m, 2H).  $^{13}\text{C}$  NMR (100 MHz,  $\text{CDCl}_3$ )  $\delta$  39.5, 65.9, 86.5, 123.1, 125.3, 127.1, 128.2 (2C), 128.5 (3C), 130.1, 131.7, 134.7, 143.7, 162.7. IR (neat) 1655, 1472, 1345, 1267, 1086, 1022  $\text{cm}^{-1}$ . MS (ESI) calcd for  $\text{C}_{16}\text{H}_{14}\text{BrClNO}$   $[\text{M}+\text{H}]^+$  349.9942, found 349.9935.

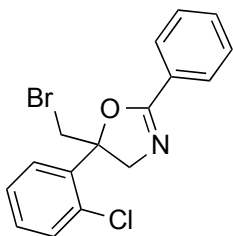

**5-(Bromomethyl)-5-(2-chlorophenyl)-2-phenyl-4,5-dihydrooxazole (5m):**  $^1\text{H}$  NMR (400 MHz,  $\text{CDCl}_3$ )  $\delta$  3.97 (d,  $J = 11.4$  Hz, 1H), 4.11 (d,  $J = 11.4$  Hz, 1H), 4.41 (d,  $J = 15.9$  Hz, 1H), 4.62 (d,  $J = 15.9$  Hz, 1H), 7.26-7.36 (m, 2H), 7.38-7.57 (m, 4H), 7.76-7.83 (m, 1H), 8.03-8.11 (m, 2H).  $^{13}\text{C}$  NMR (100 MHz,  $\text{CDCl}_3$ )  $\delta$  38.1, 65.3, 87.1, 127.16, 127.22, 127.8, 128.3 (2C), 128.5 (2C), 129.8, 129.9, 130.9, 131.6, 139.0, 162.0. IR (neat) 1659, 1450, 1345, 1267, 1088, 1022  $\text{cm}^{-1}$ . MS

(ESI) calcd for  $C_{16}H_{14}BrClNO$   $[M+H]^+$  349.9942, found 349.9936.

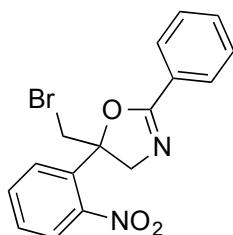

**5-(Bromomethyl)-5-(2-nitrophenyl)-2-phenyl-4,5-dihydrooxazole (5n):**  $^1H$  NMR (400 MHz,  $CDCl_3$ )  $\delta$  3.80 (d,  $J = 11.2$  Hz, 1H), 3.84 (d,  $J = 11.2$  Hz, 1H), 4.29 (d,  $J = 15.2$  Hz, 1H), 4.54 (d,  $J = 15.2$  Hz, 1H), 7.44-7.52 (m, 2H), 7.52-7.58 (m, 1H), 7.62 (t,  $J = 8.1$  Hz, 1H), 7.74-7.82 (m, 1H), 8.02-8.10 (m, 2H), 8.18-8.26 (m, 1H), 8.33 (t,  $J = 1.9$  Hz, 1H).  $^{13}C$  NMR (100 MHz,  $CDCl_3$ )  $\delta$  39.0, 66.0, 86.4, 120.4, 123.3, 126.8, 128.3 (2C), 128.6 (2C), 129.9, 131.3, 131.9, 143.8, 148.4, 162.8. IR (neat) 1732, 1656, 1528, 1347, 1268, 1064, 1022  $cm^{-1}$ . MS (ESI) calcd for  $C_{16}H_{14}BrN_2O_3$   $[M+H]^+$  361.0182, found 361.0176.

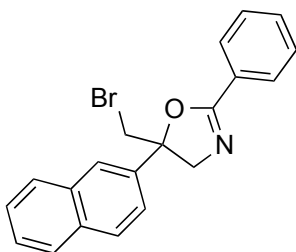

**5-(Bromomethyl)-5-(naphthalen-2-yl)-2-phenyl-4,5-dihydrooxazole (5o):**  $^1H$  NMR (400 MHz,  $CDCl_3$ )  $\delta$  3.88 (d,  $J = 11.4$  Hz, 1H), 3.93 (d,  $J = 11.4$  Hz, 1H), 4.38 (d,  $J = 15.1$  Hz, 1H), 4.57 (d,  $J = 15.1$  Hz, 1H), 7.44-7.58 (m, 6H), 7.81-7.95 (m, 4H), 8.07-8.14 (m, 2H).  $^{13}C$  NMR (100 MHz,  $CDCl_3$ )  $\delta$  40.0, 65.9, 87.2, 122.7, 124.0, 126.6, 126.7, 127.4, 127.7, 128.2, 128.3 (2C), 128.5 (2C), 128.9, 131.6, 132.9, 133.0, 138.8, 163.0. IR (neat) 1654, 1449, 1334, 1269, 1088, 1022  $cm^{-1}$ . MS (ESI) calcd for  $C_{20}H_{17}BrNO$   $[M+H]^+$  366.0488, found 366.0486.

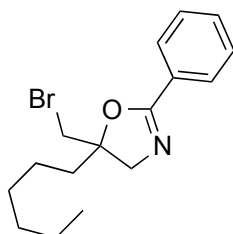

**5-(Bromomethyl)-5-hexyl-2-phenyl-4,5-dihydrooxazole (5p):**  $^1H$  NMR (400 MHz,  $CDCl_3$ )  $\delta$  0.88 (t,  $J = 6.9$  Hz, 3H), 1.22-1.48 (m, 8H), 1.80-1.97 (m, 2H), 3.54 (d,  $J = 10.9$  Hz, 1H), 3.58 (d,  $J = 10.9$  Hz, 1H), 3.86 (d,  $J = 15.3$  Hz, 1H), 4.03 (d,  $J = 15.3$  Hz, 1H), 7.38-7.45 (m, 2H), 7.45-7.51 (m, 1H), 7.90-7.96 (m, 2H).  $^{13}C$  NMR (100 MHz,  $CDCl_3$ )  $\delta$  14.0, 22.5, 23.2, 29.4, 31.6, 37.0, 37.8, 63.0, 86.3, 127.6, 128.1 (2C), 128.3 (2C), 131.4, 168.2. IR (neat) 2928, 1651, 1450, 1348,



1265, 1086, 1024  $\text{cm}^{-1}$ . MS (ESI) calcd for  $\text{C}_{16}\text{H}_{23}\text{BrNO}$   $[\text{M}+\text{H}]^+$  324.0958, found 324.0949.

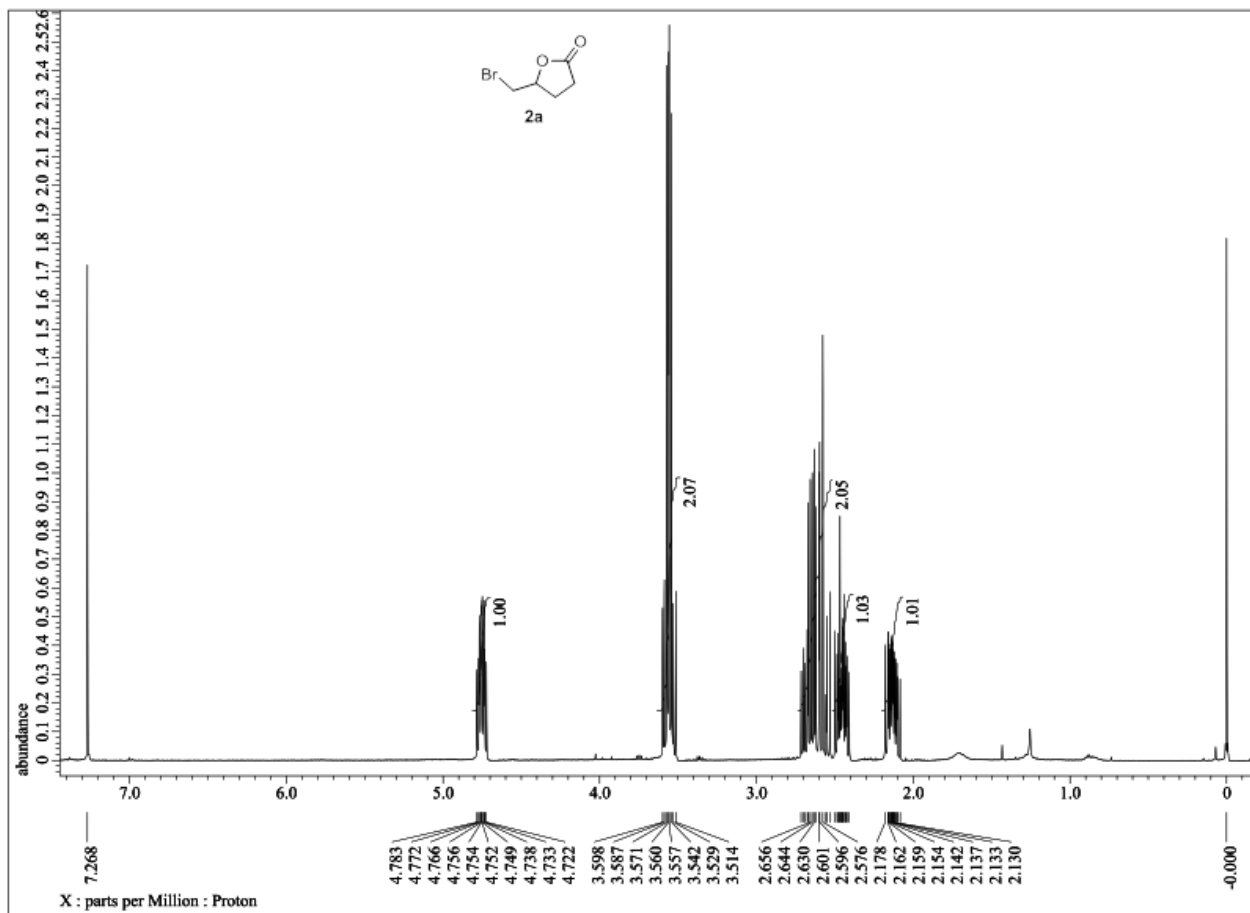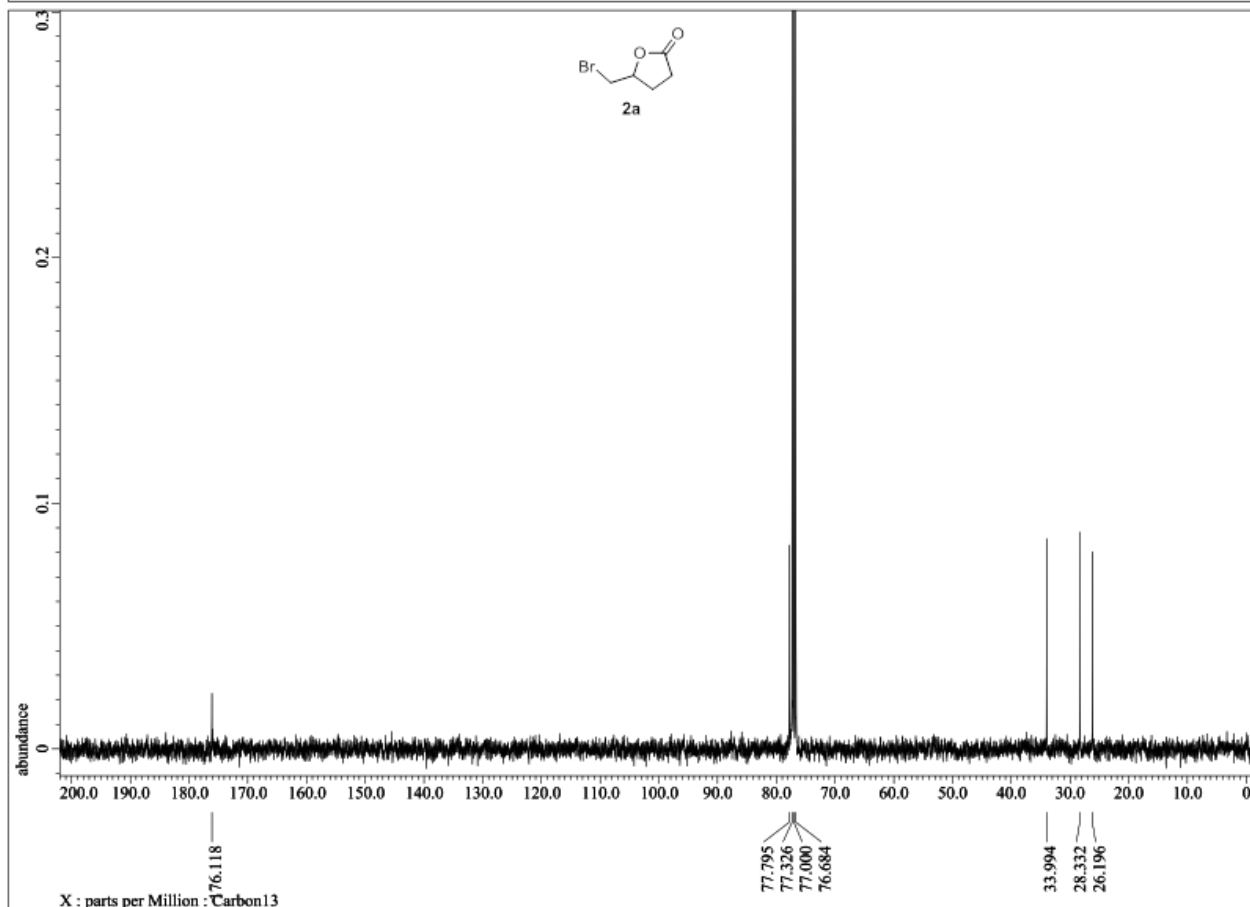

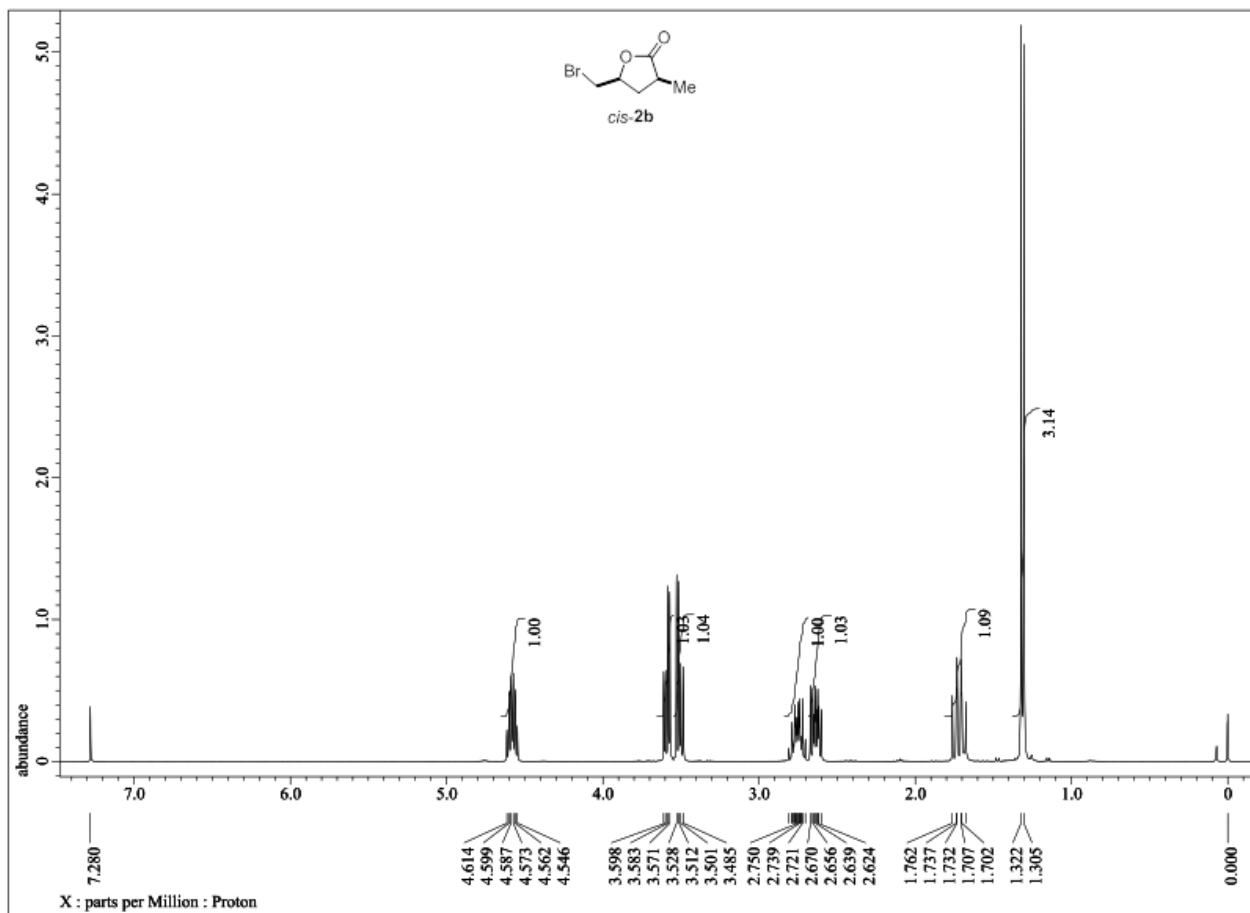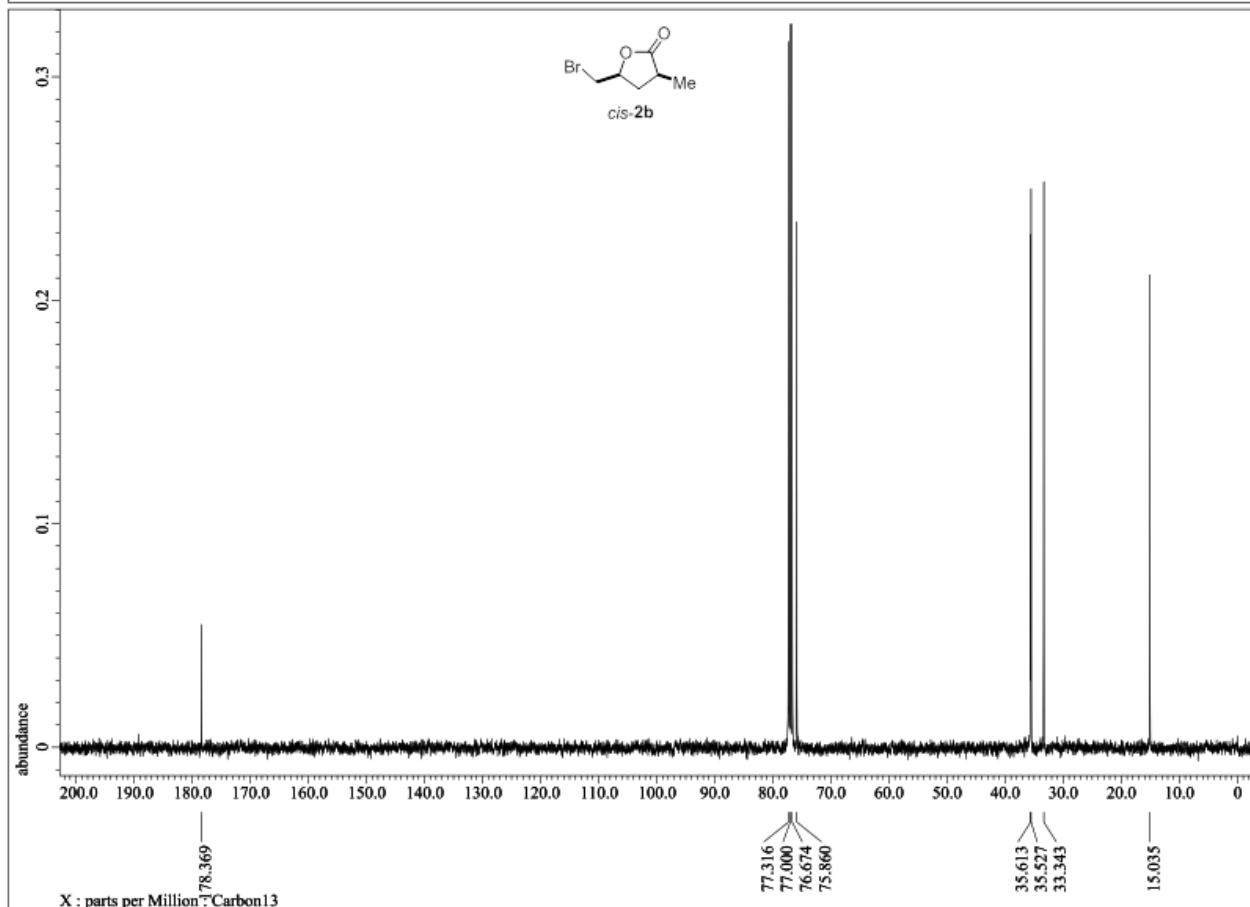

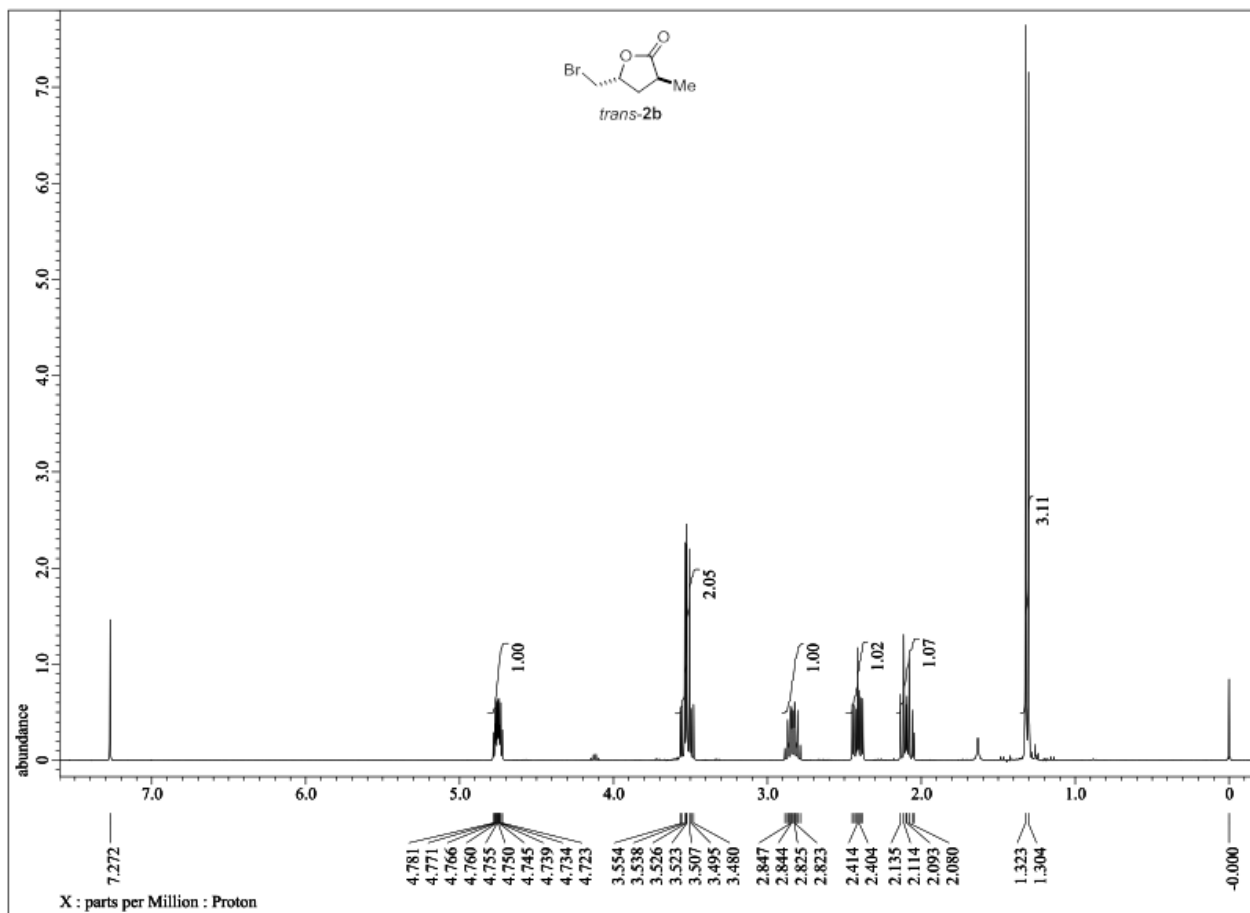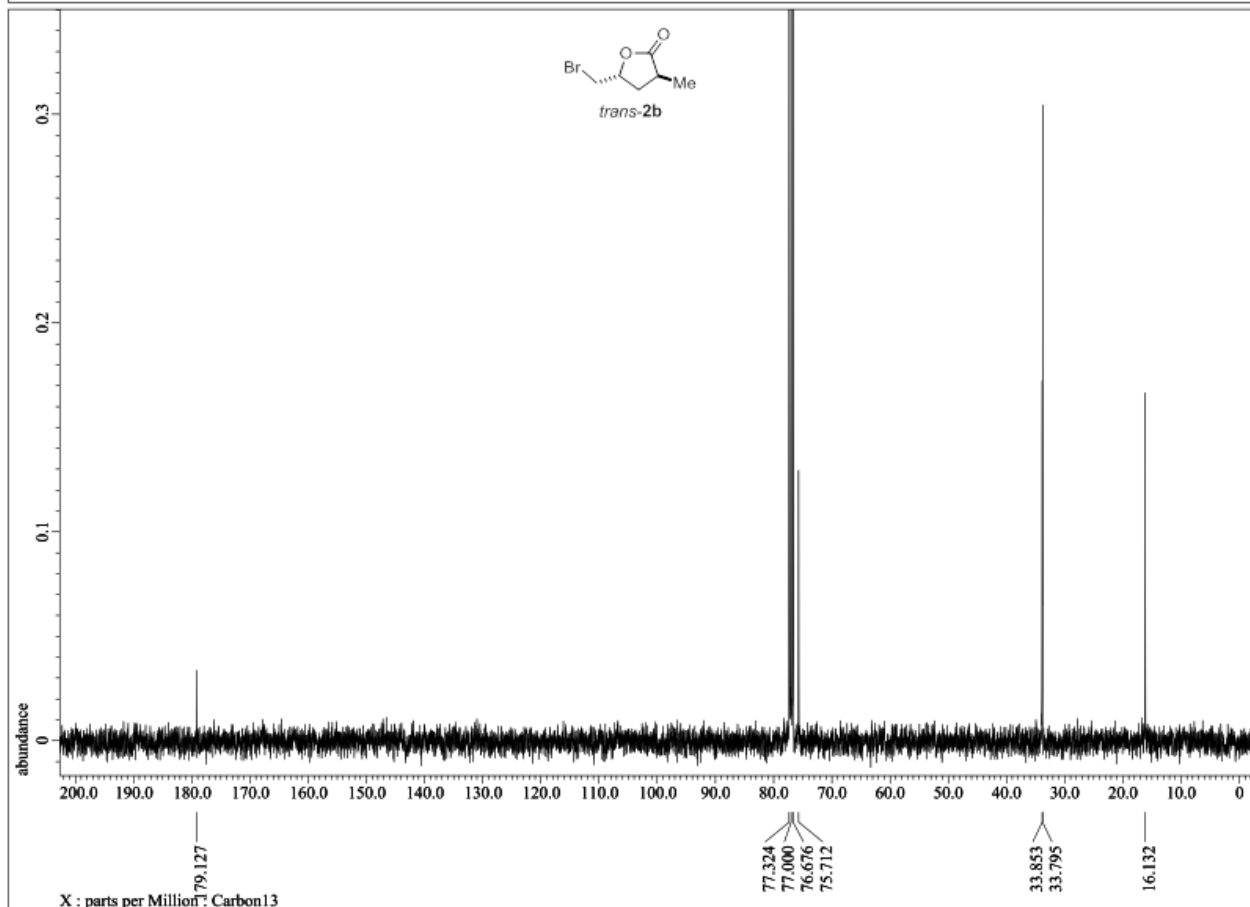

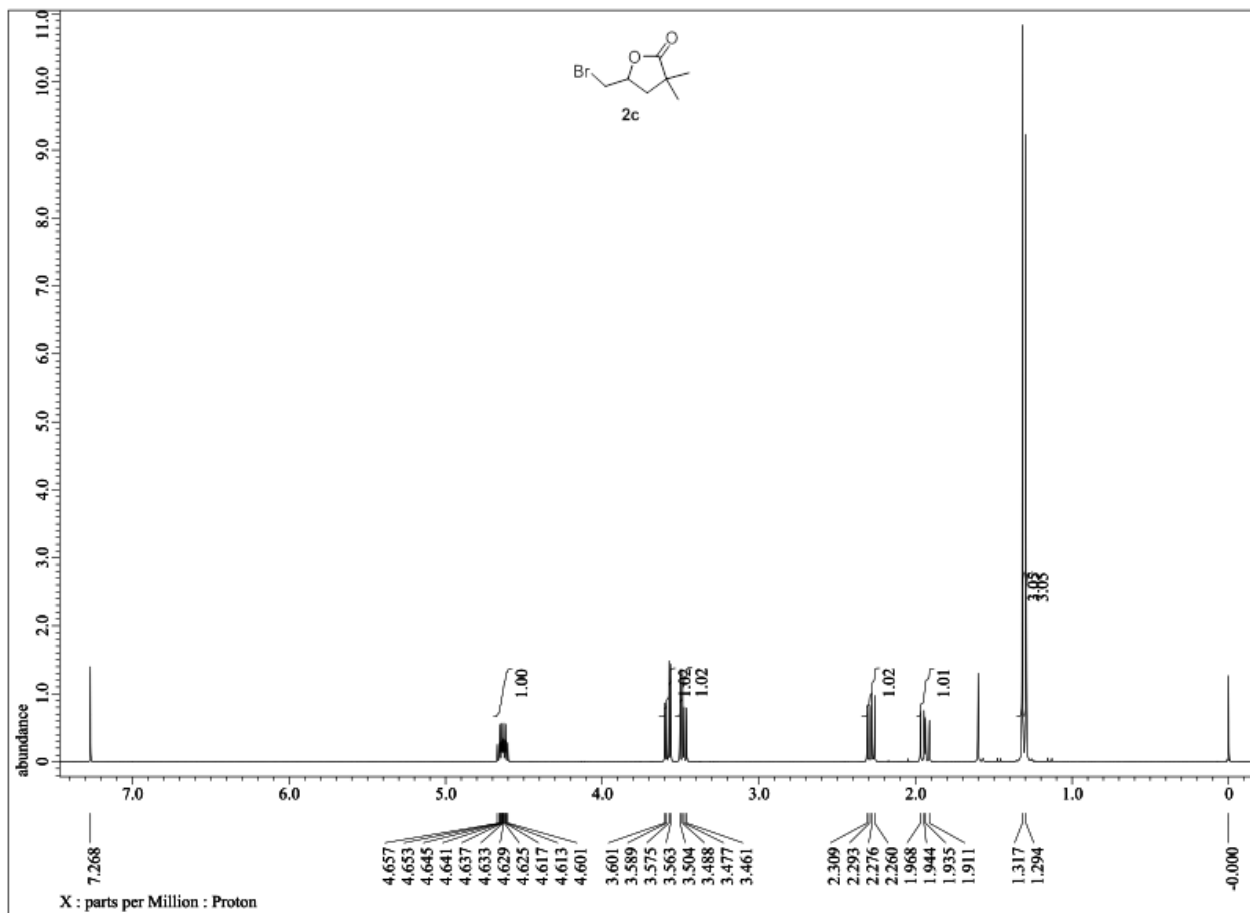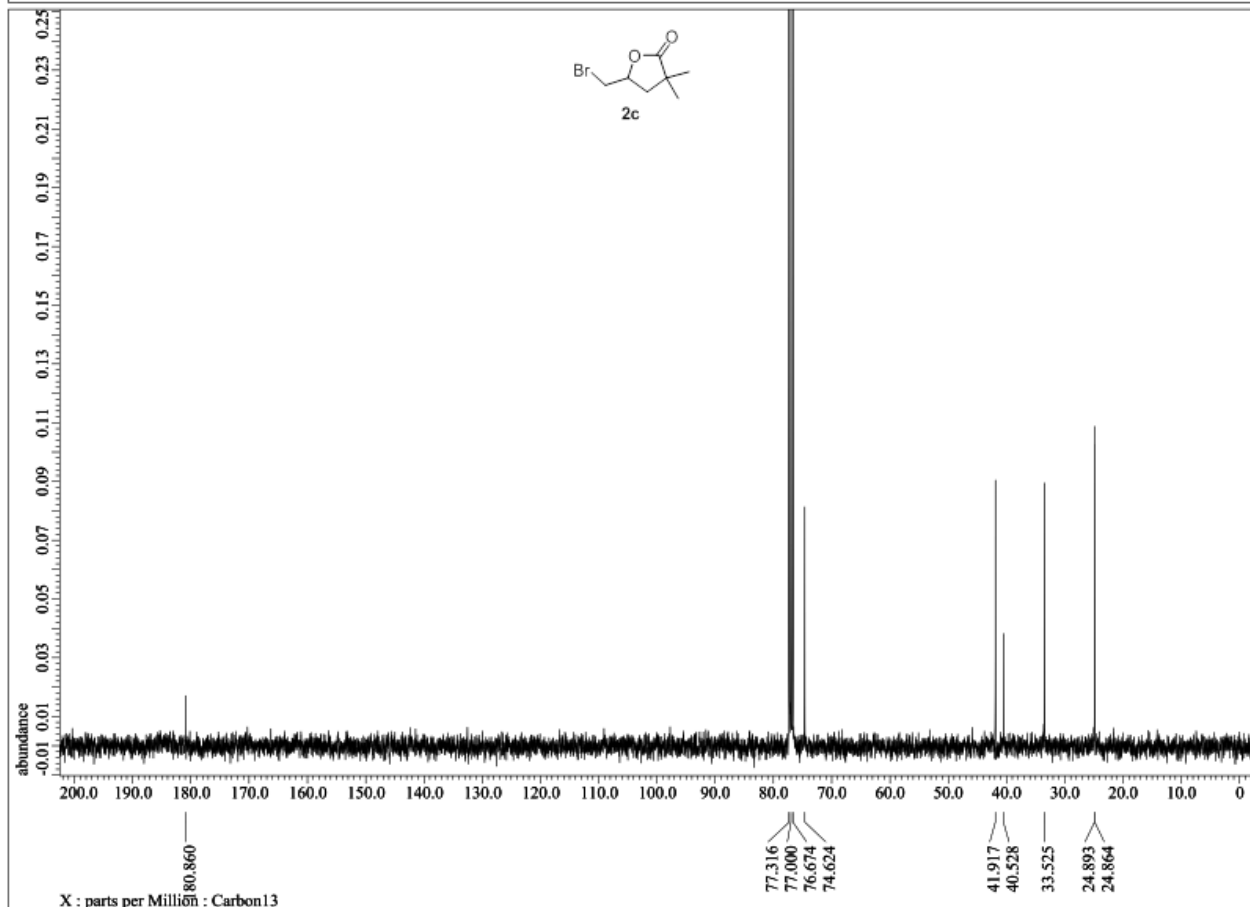

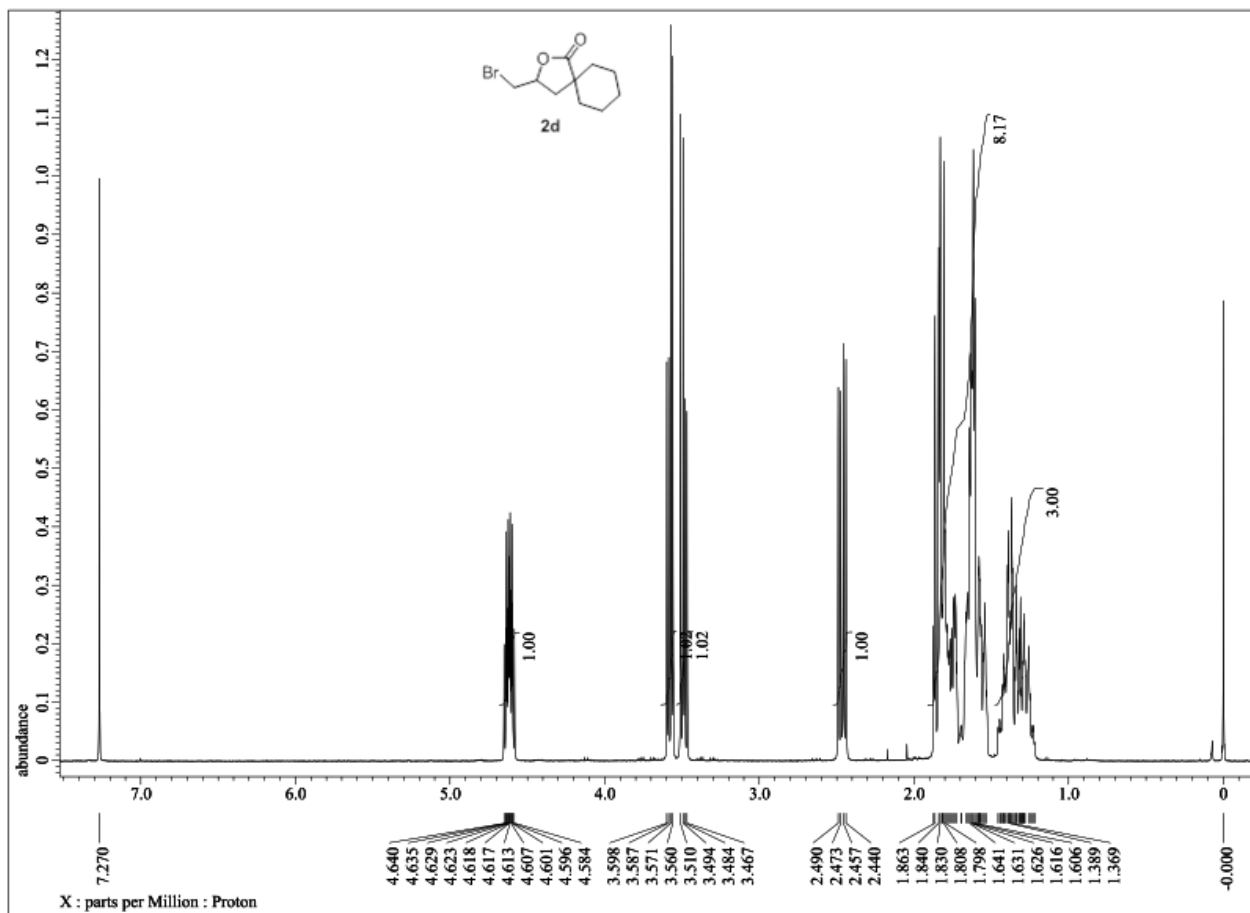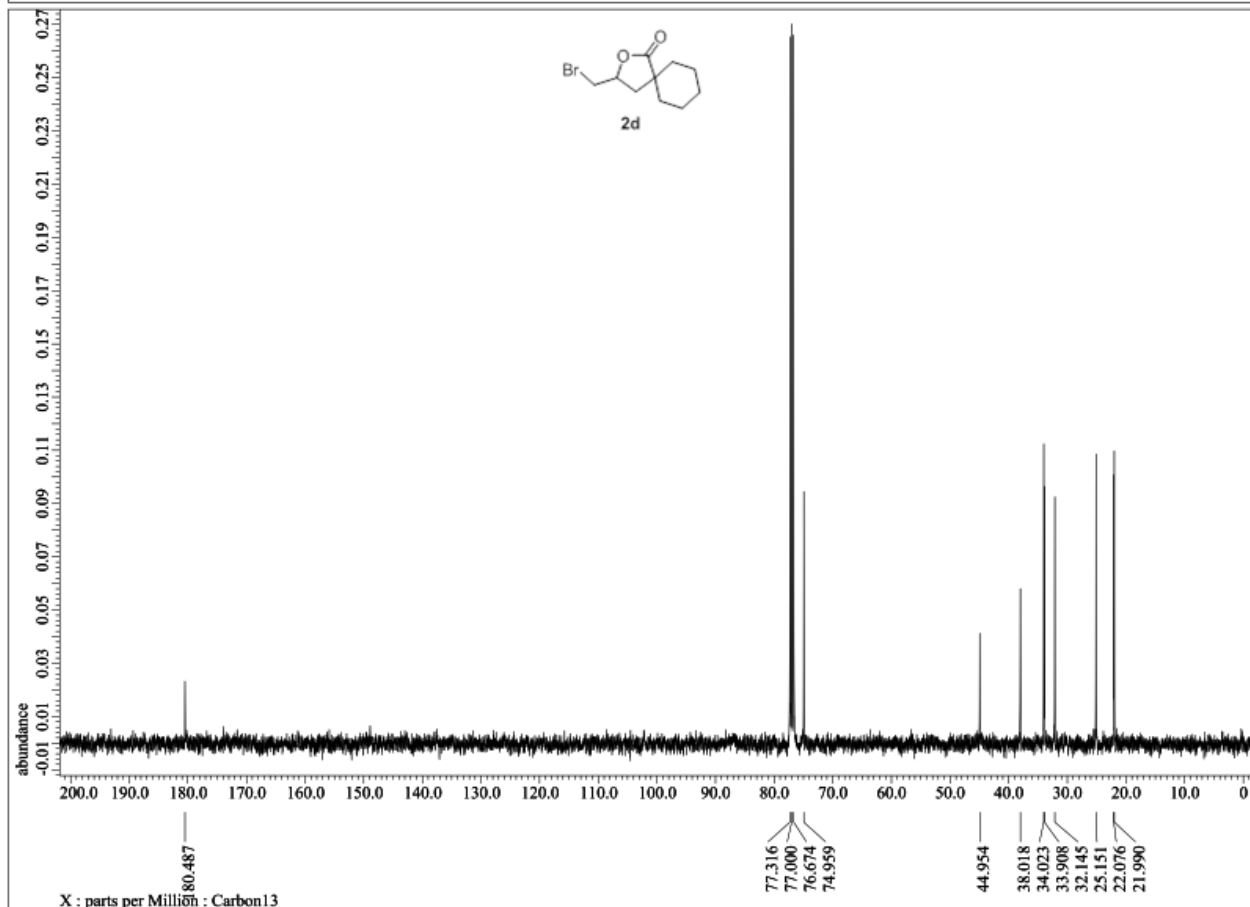

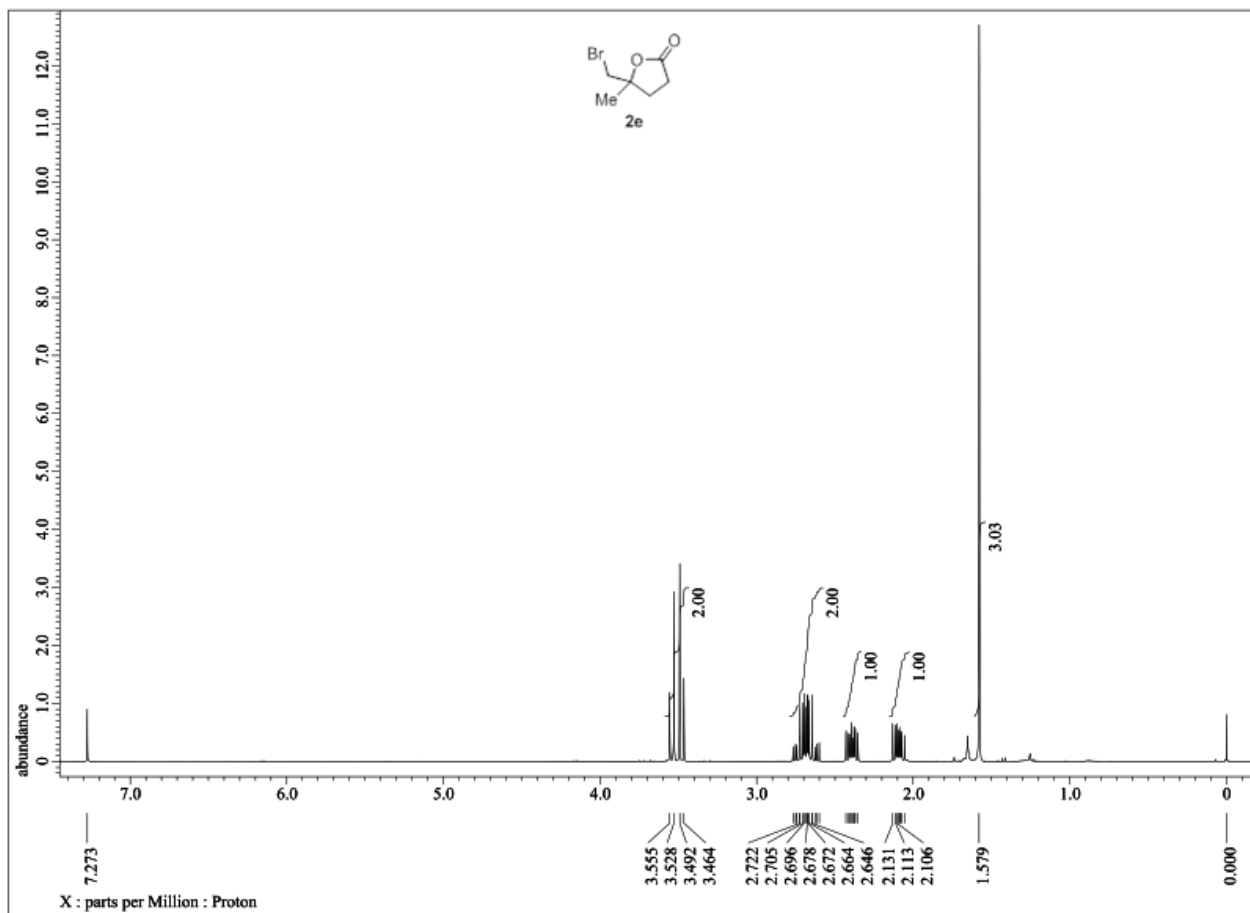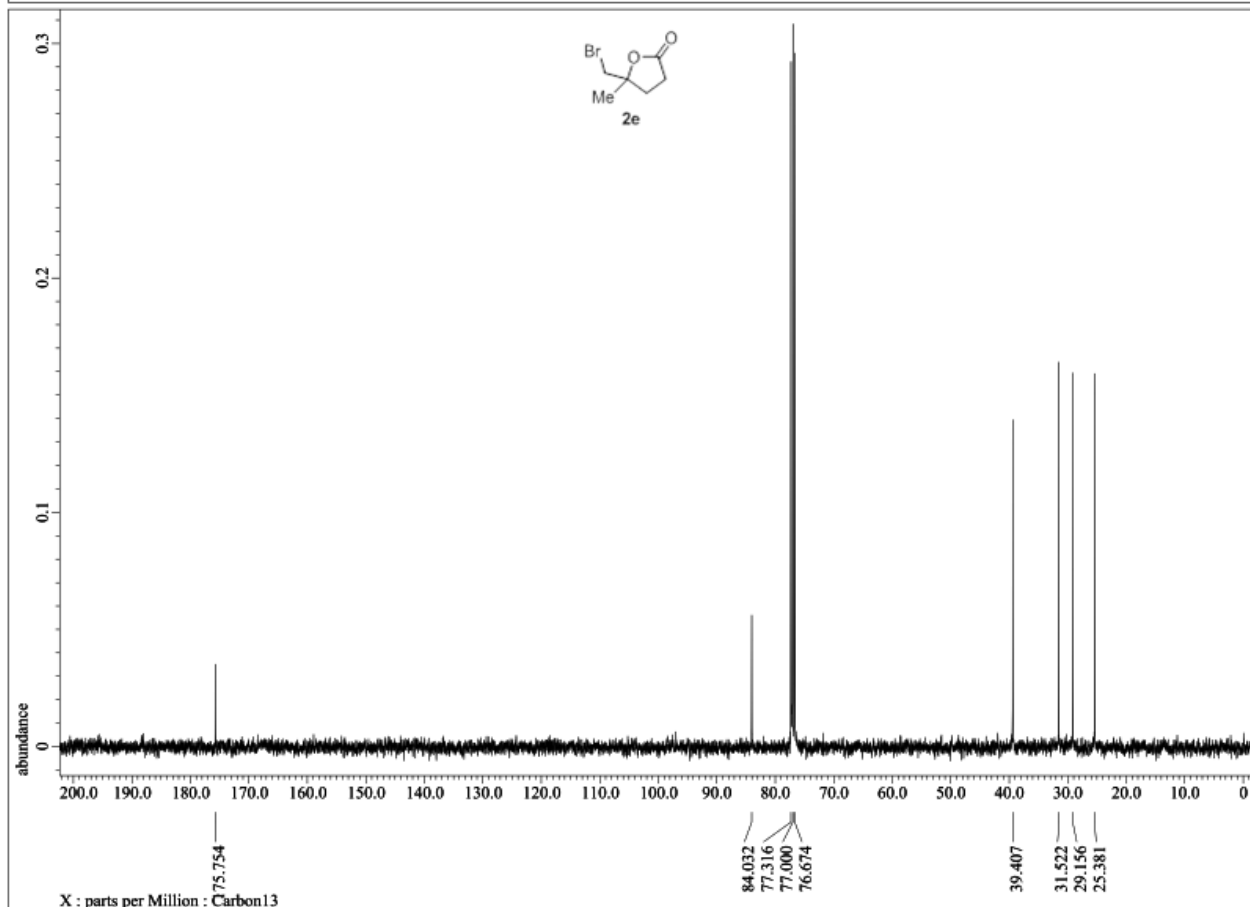

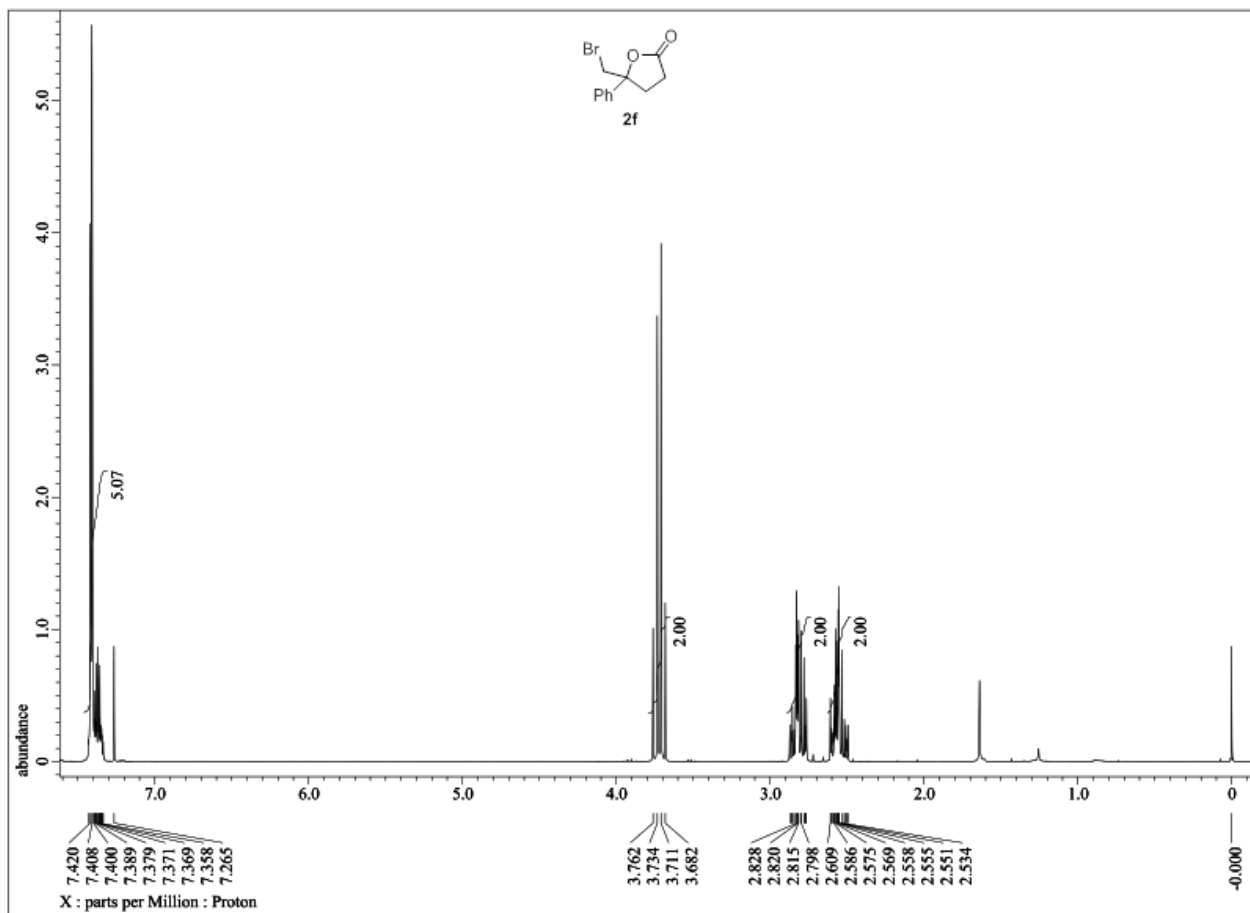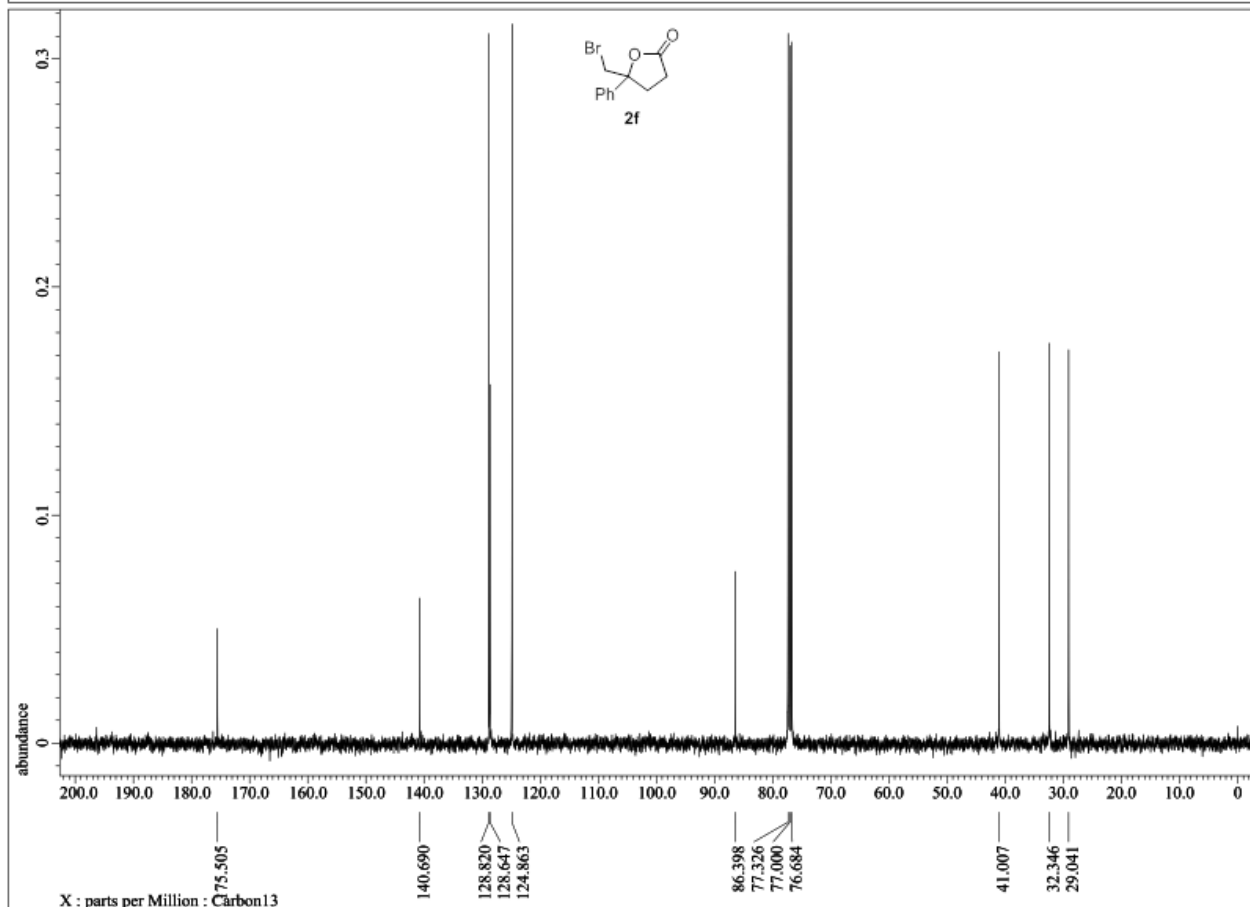



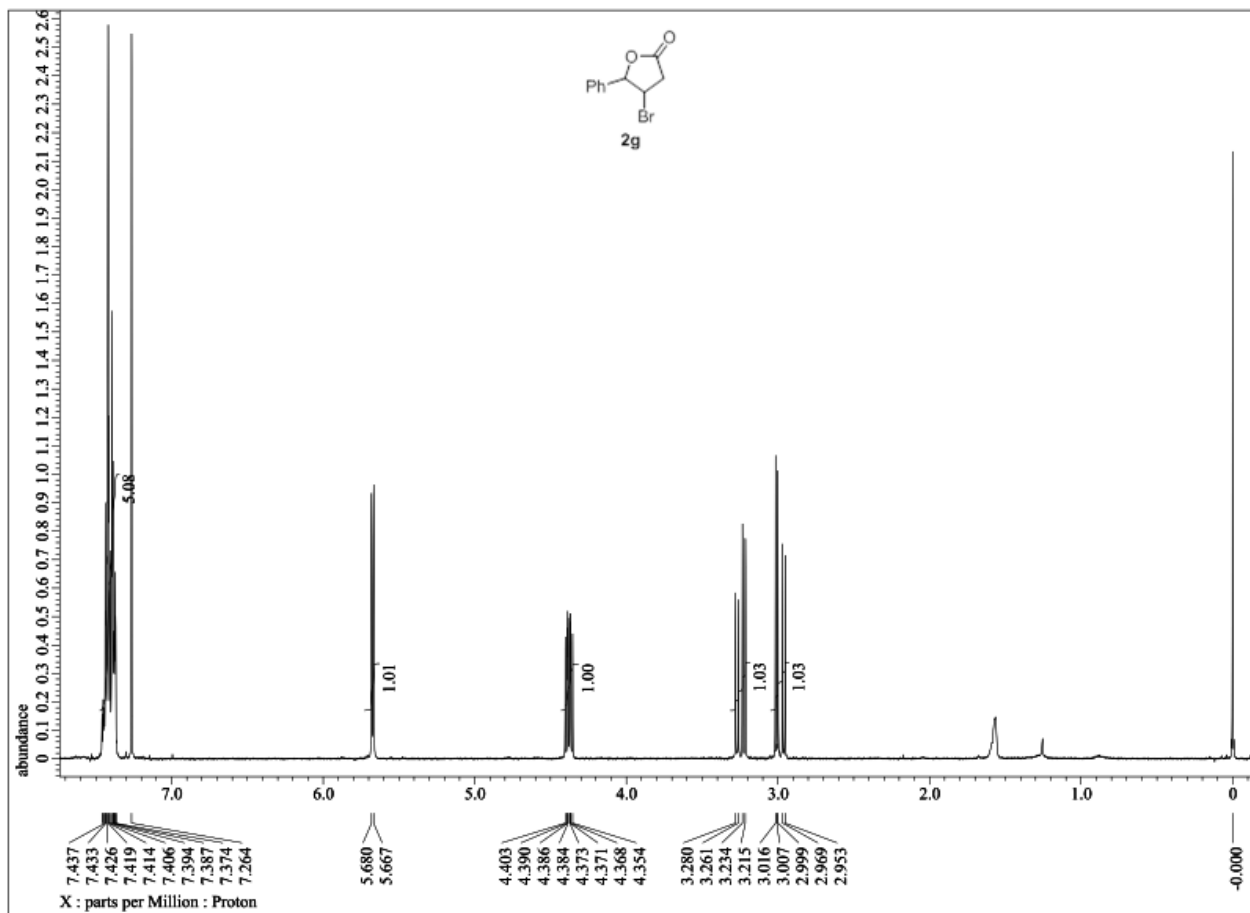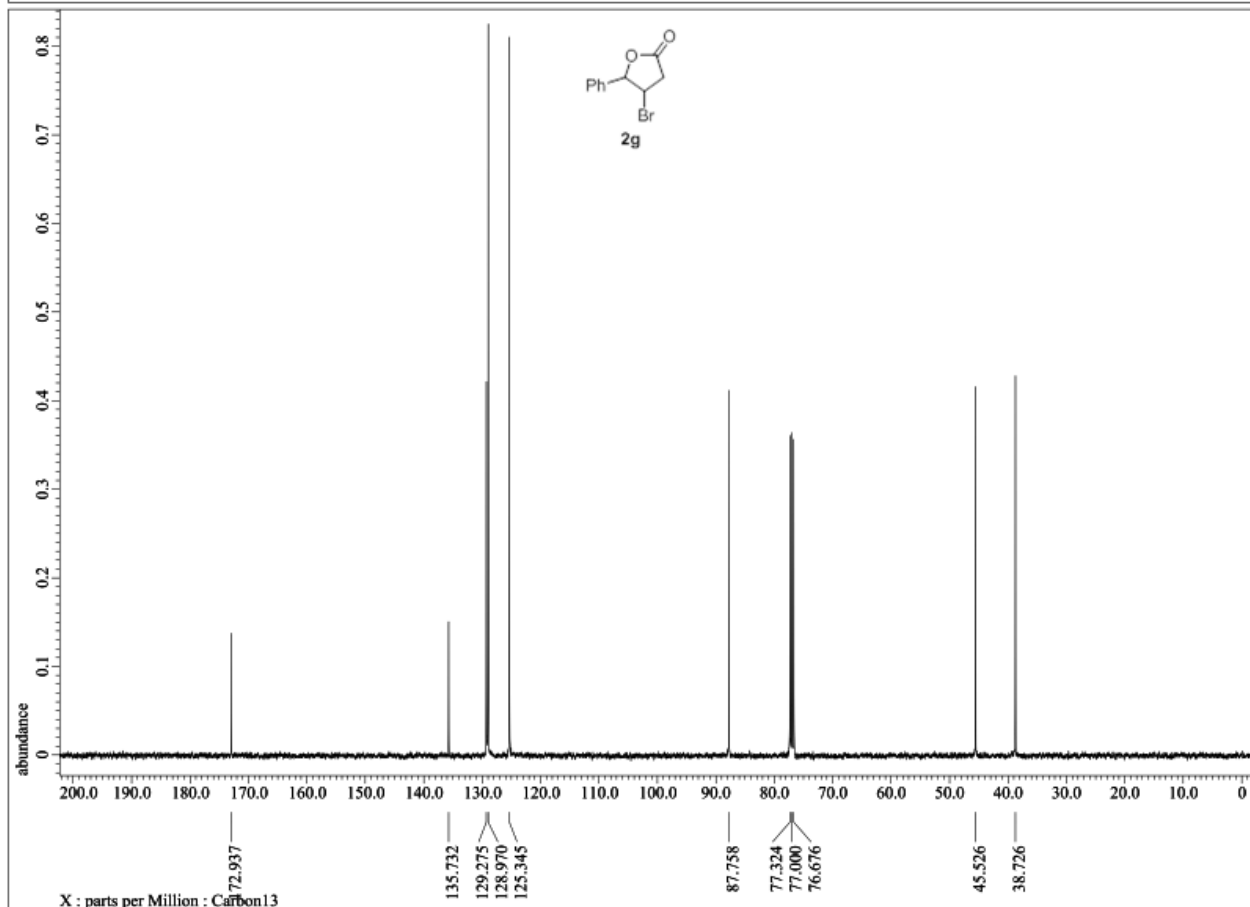

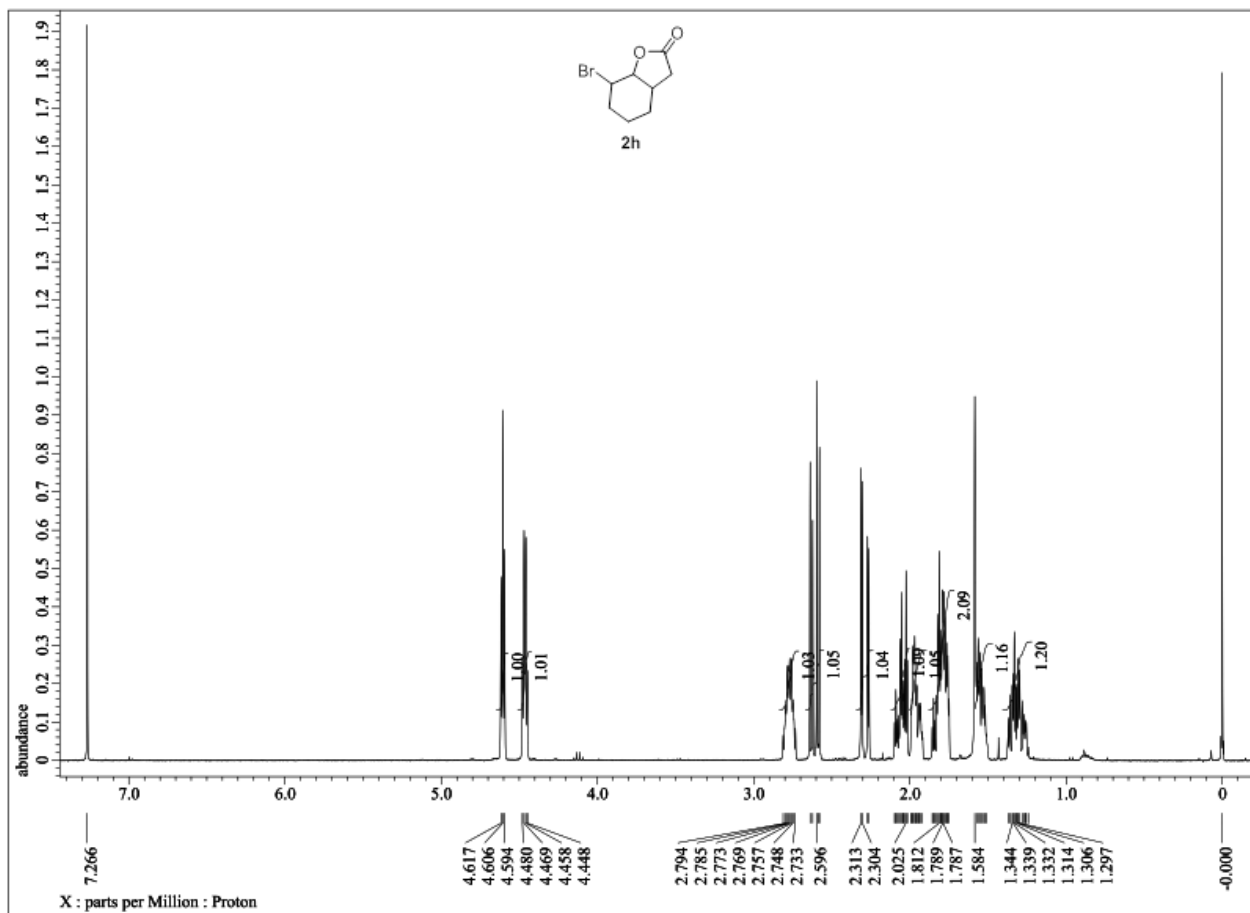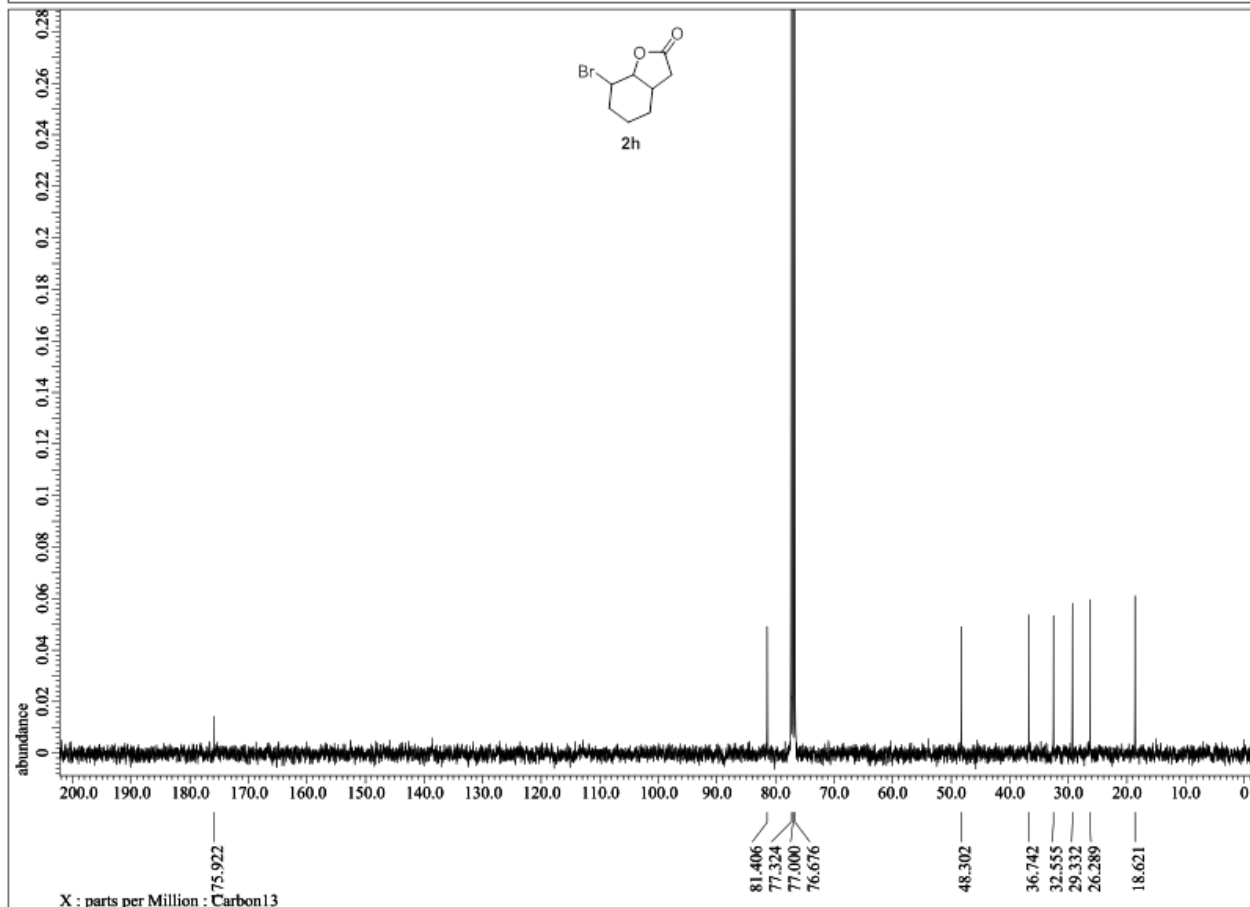

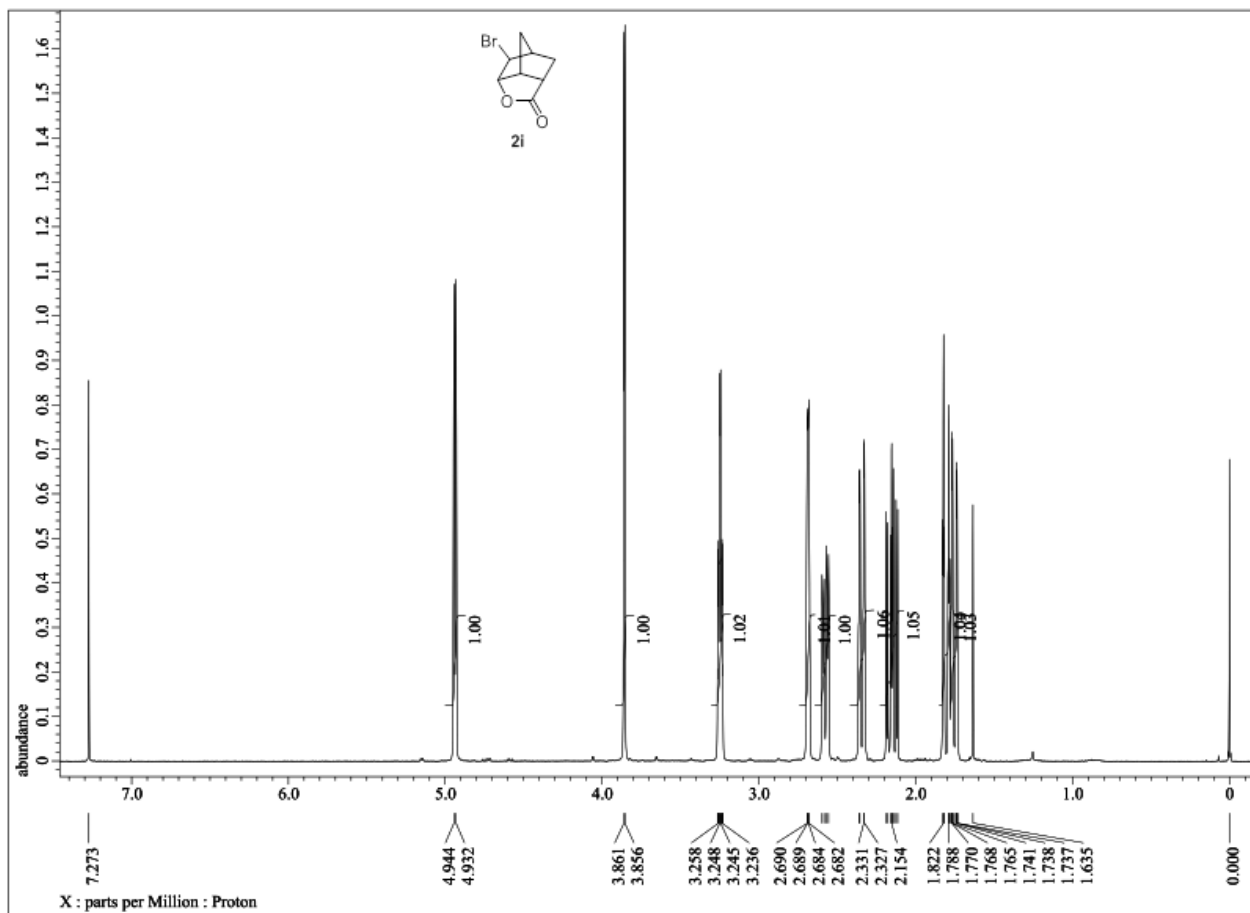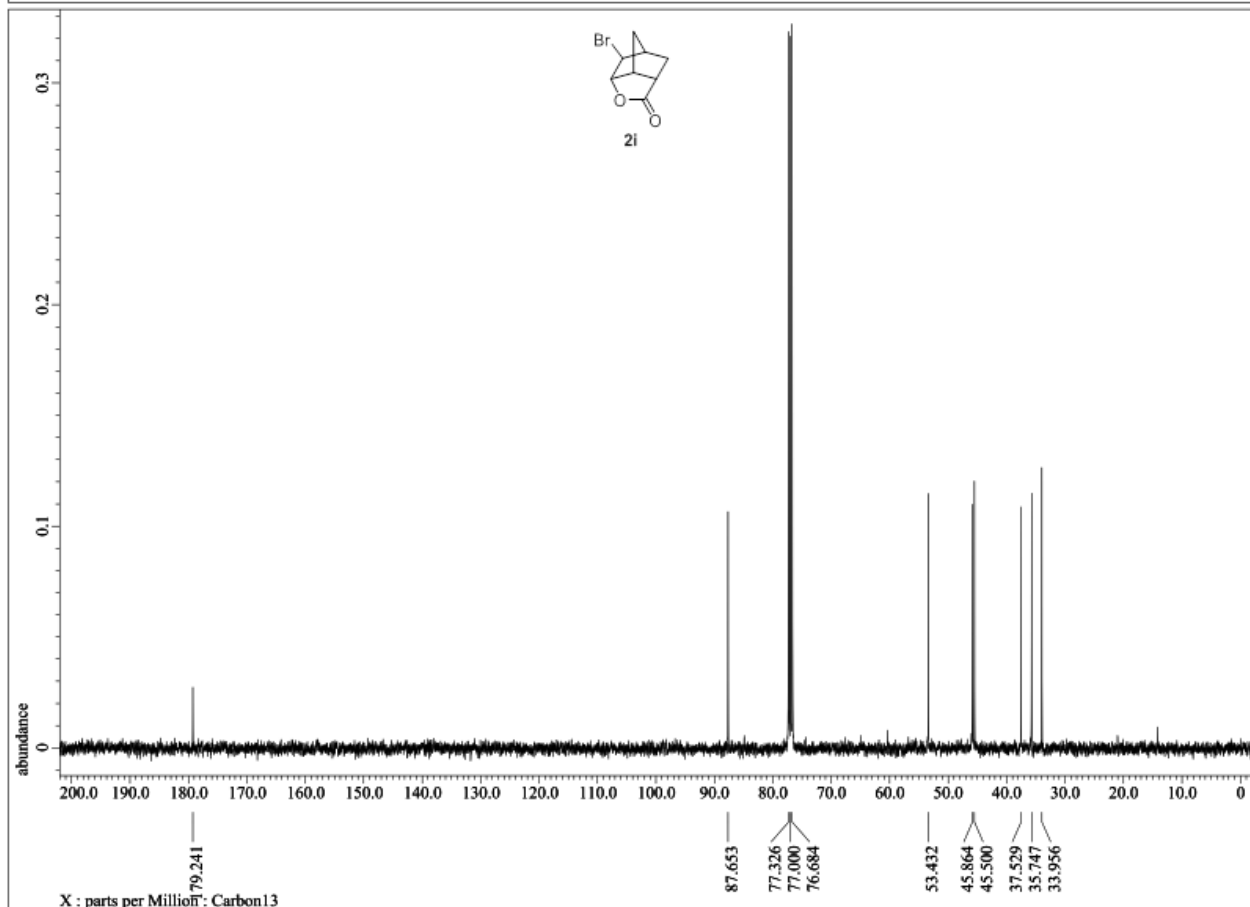

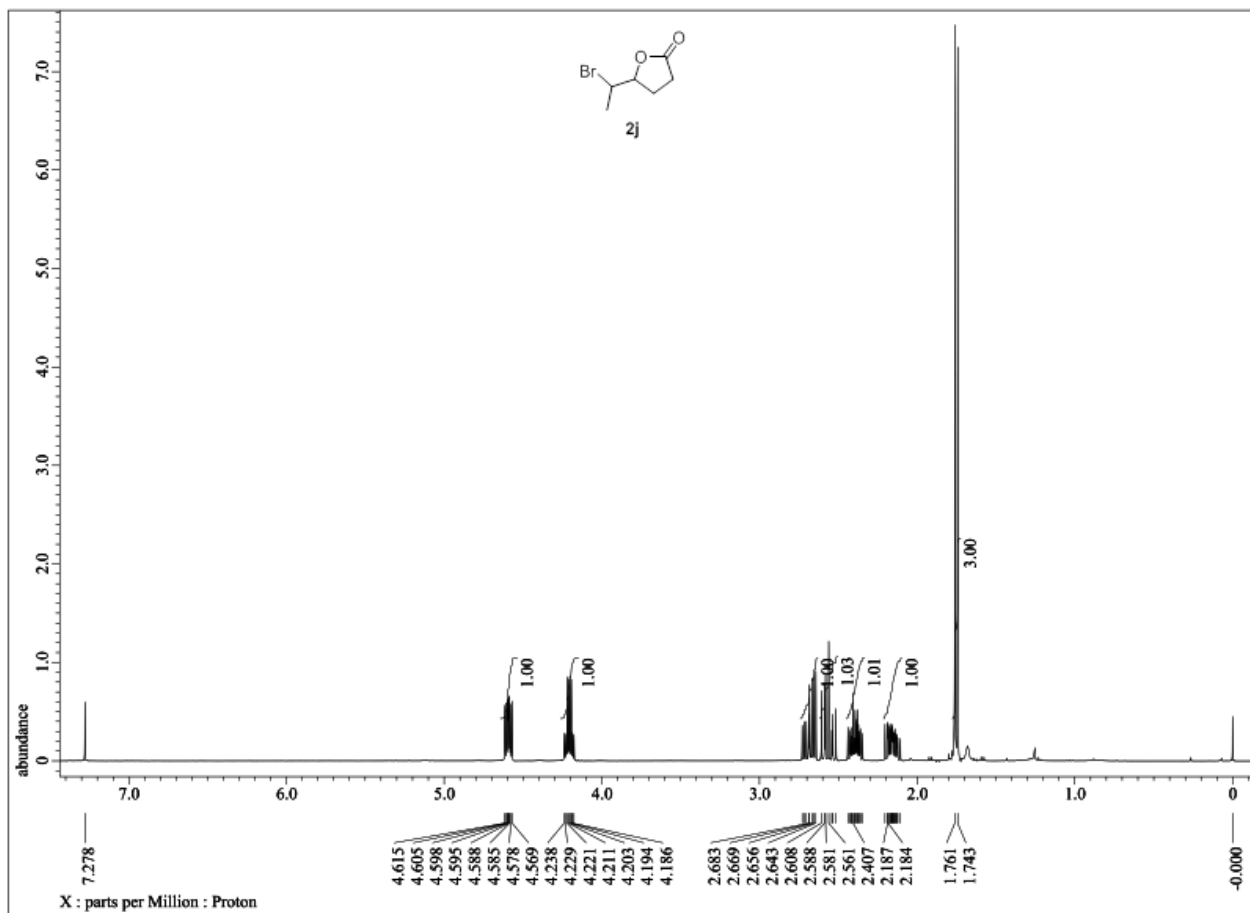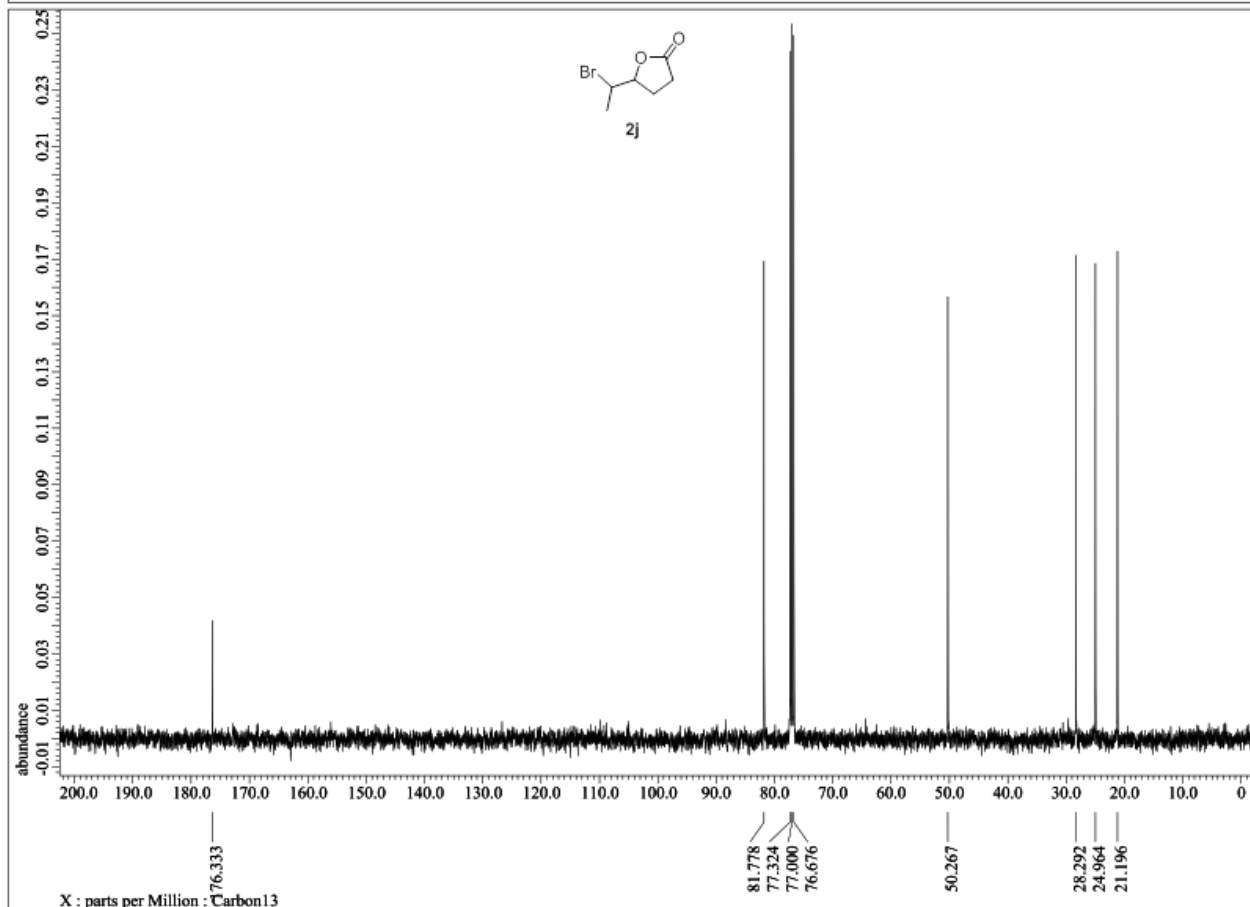

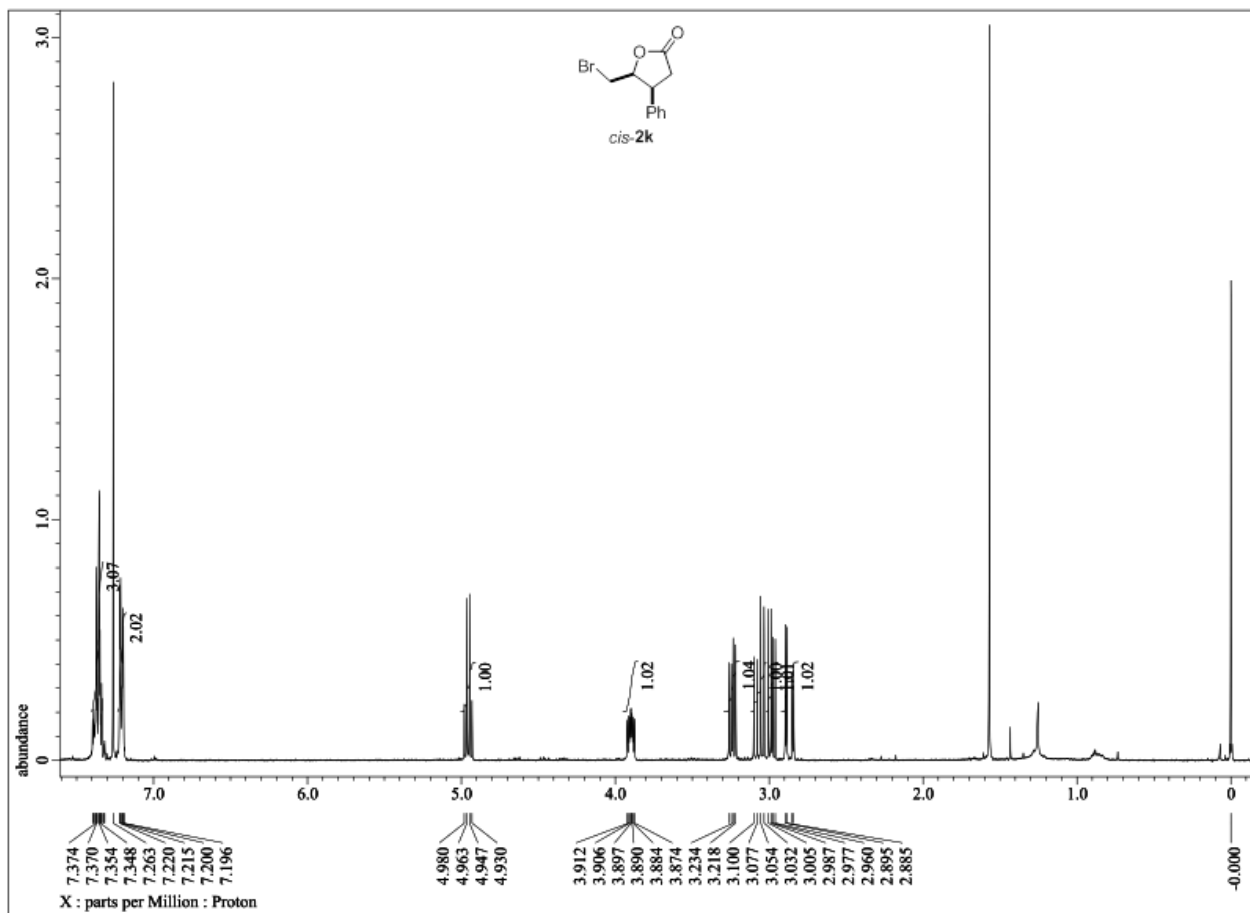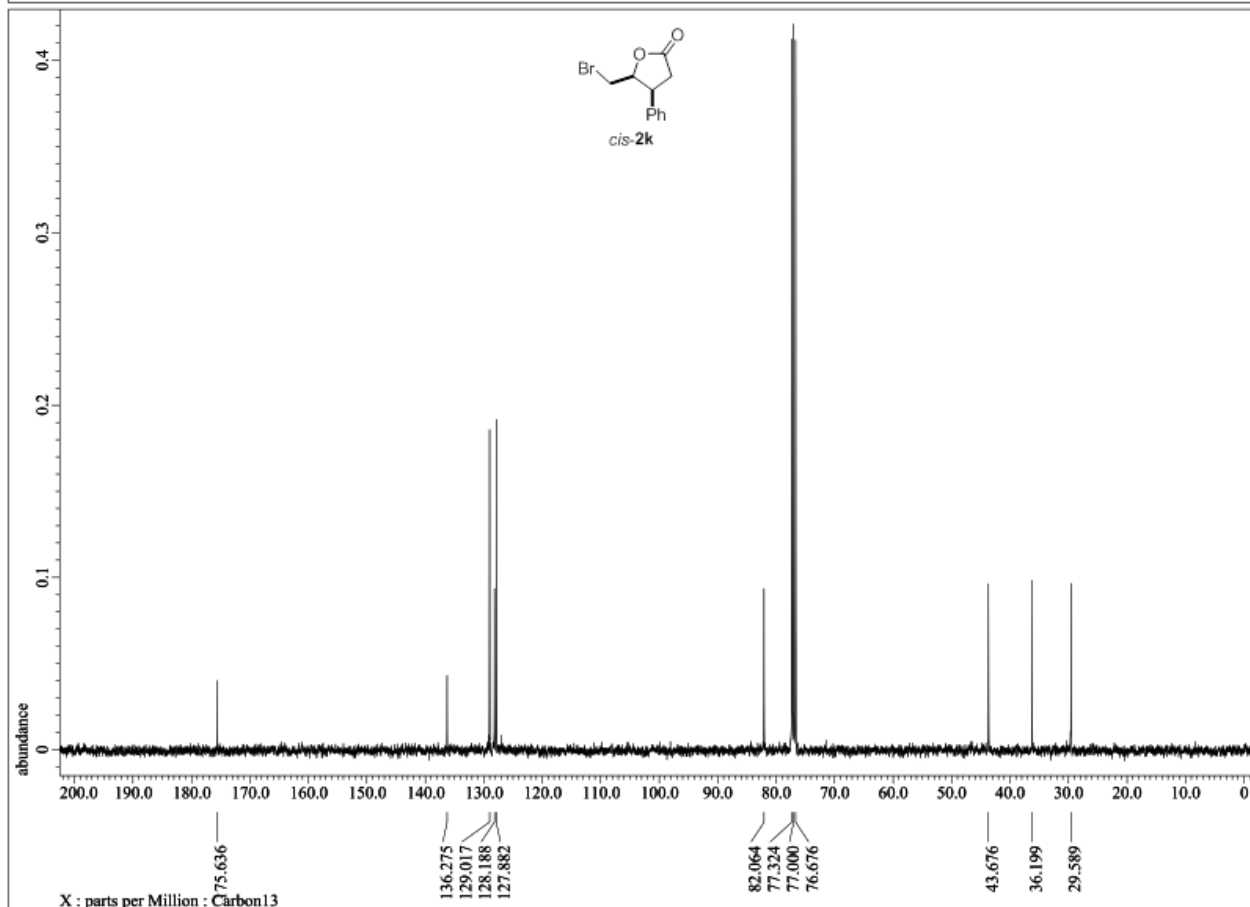

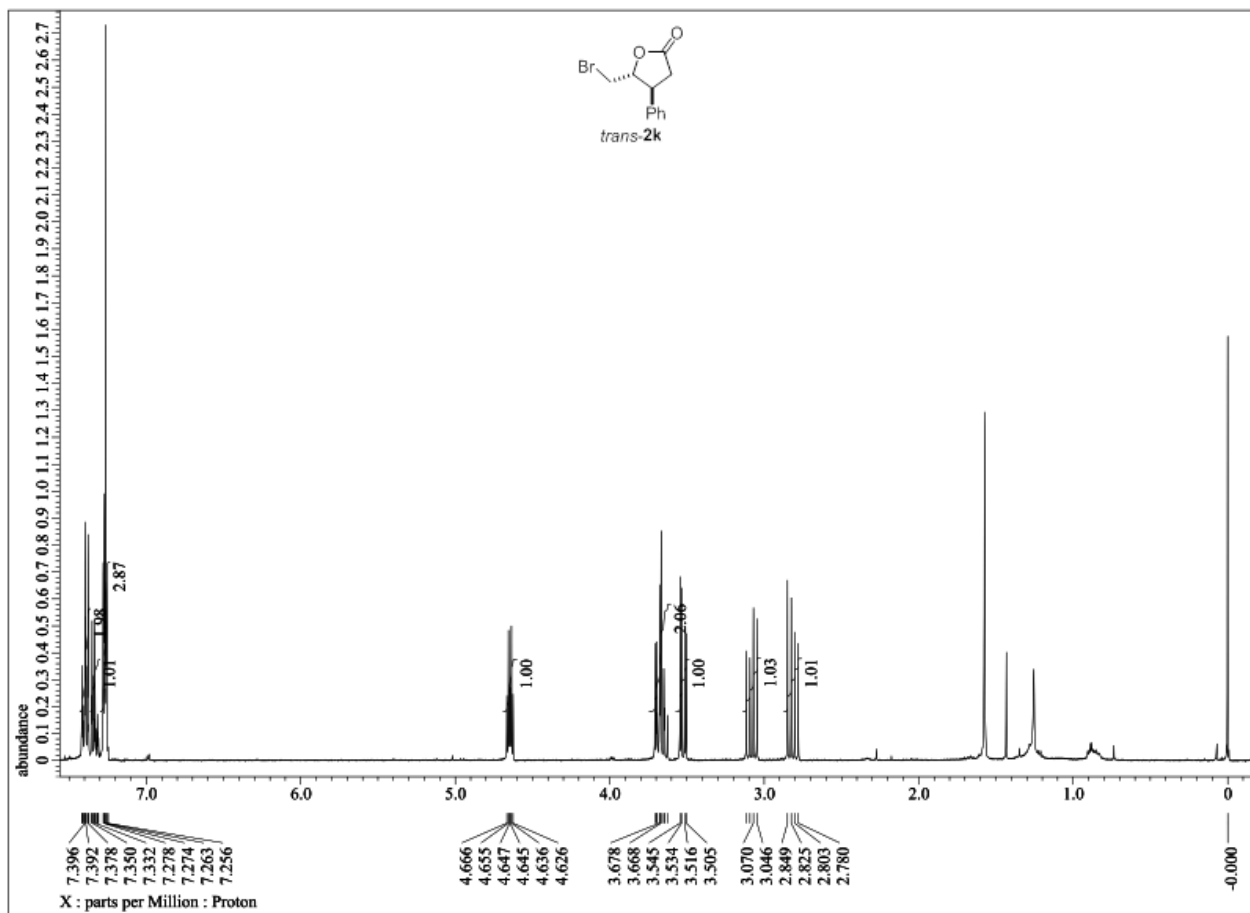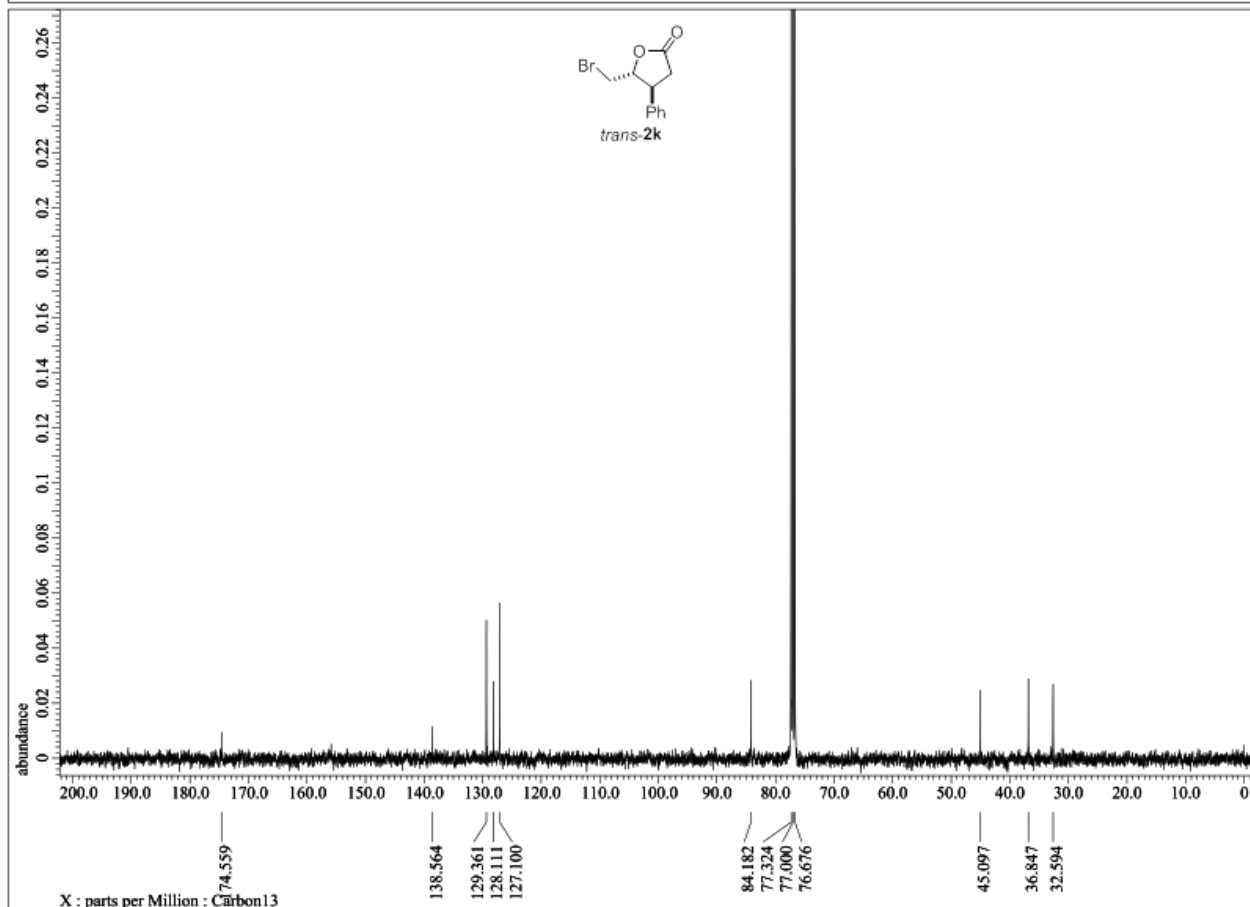

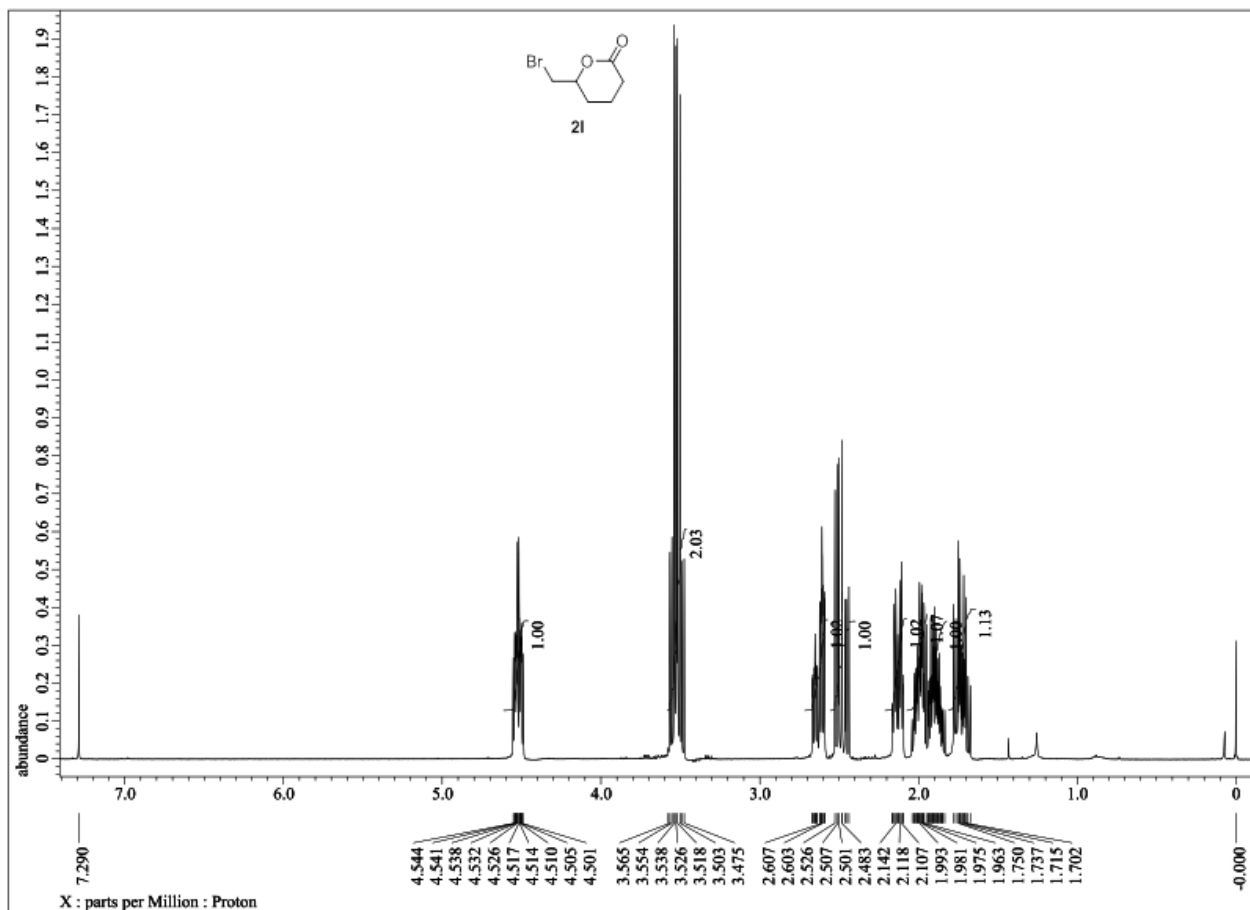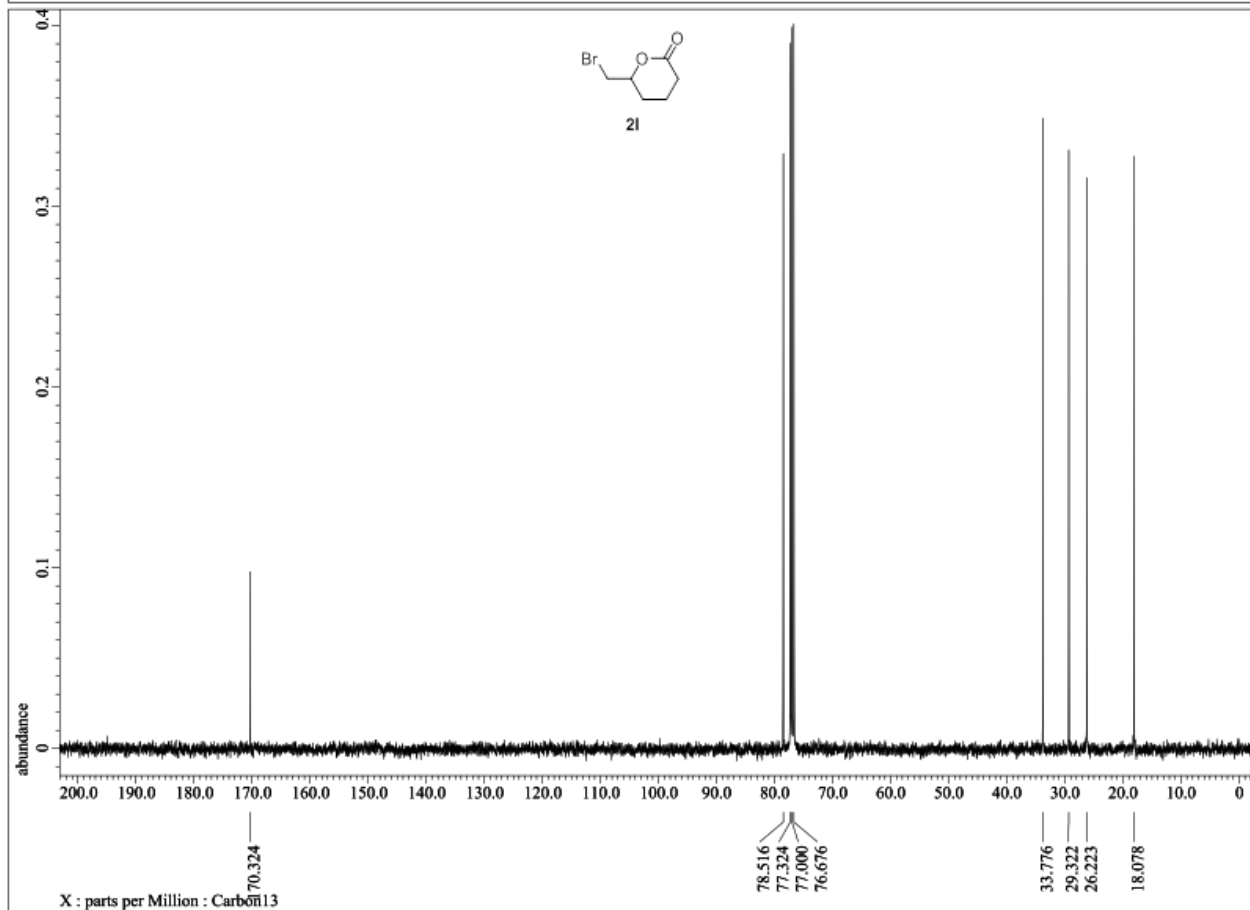

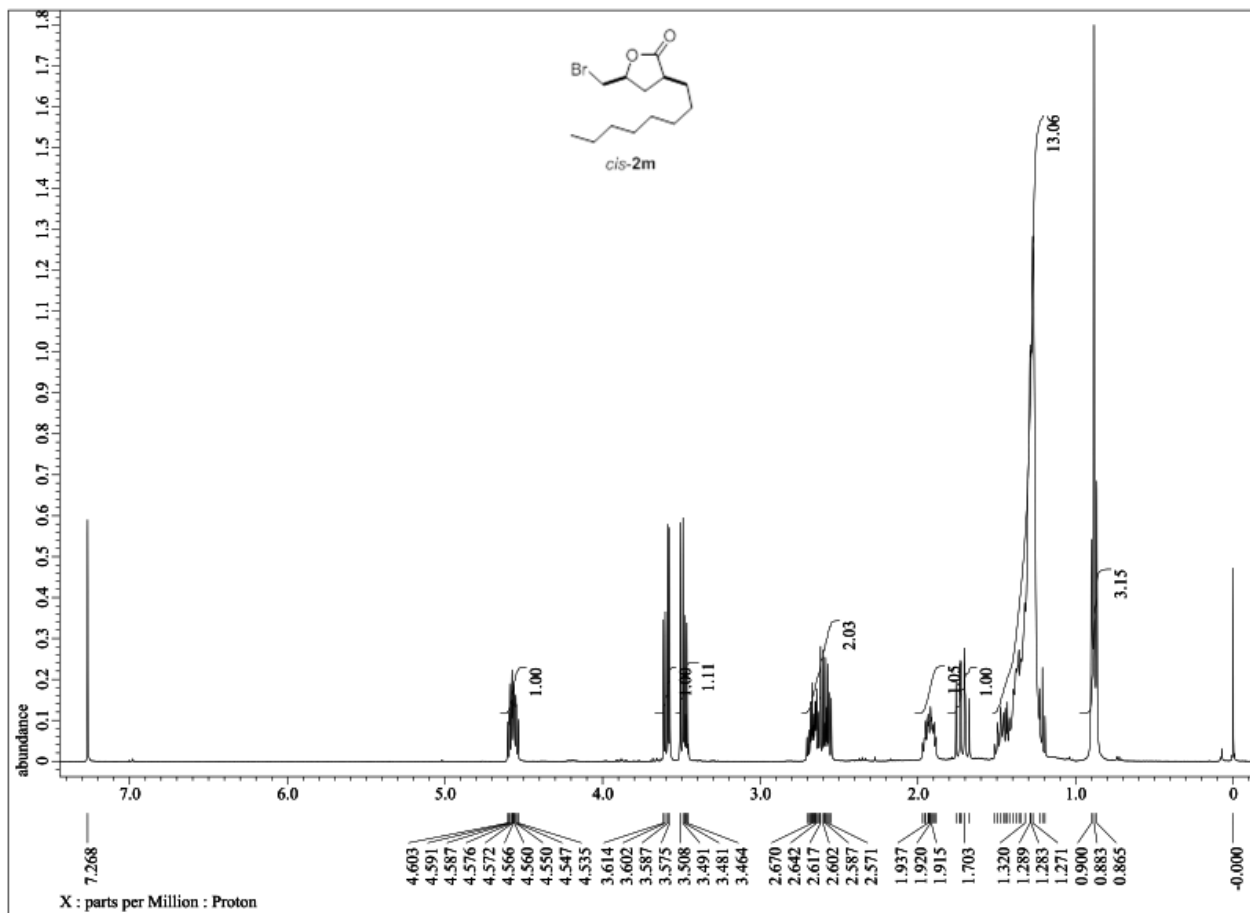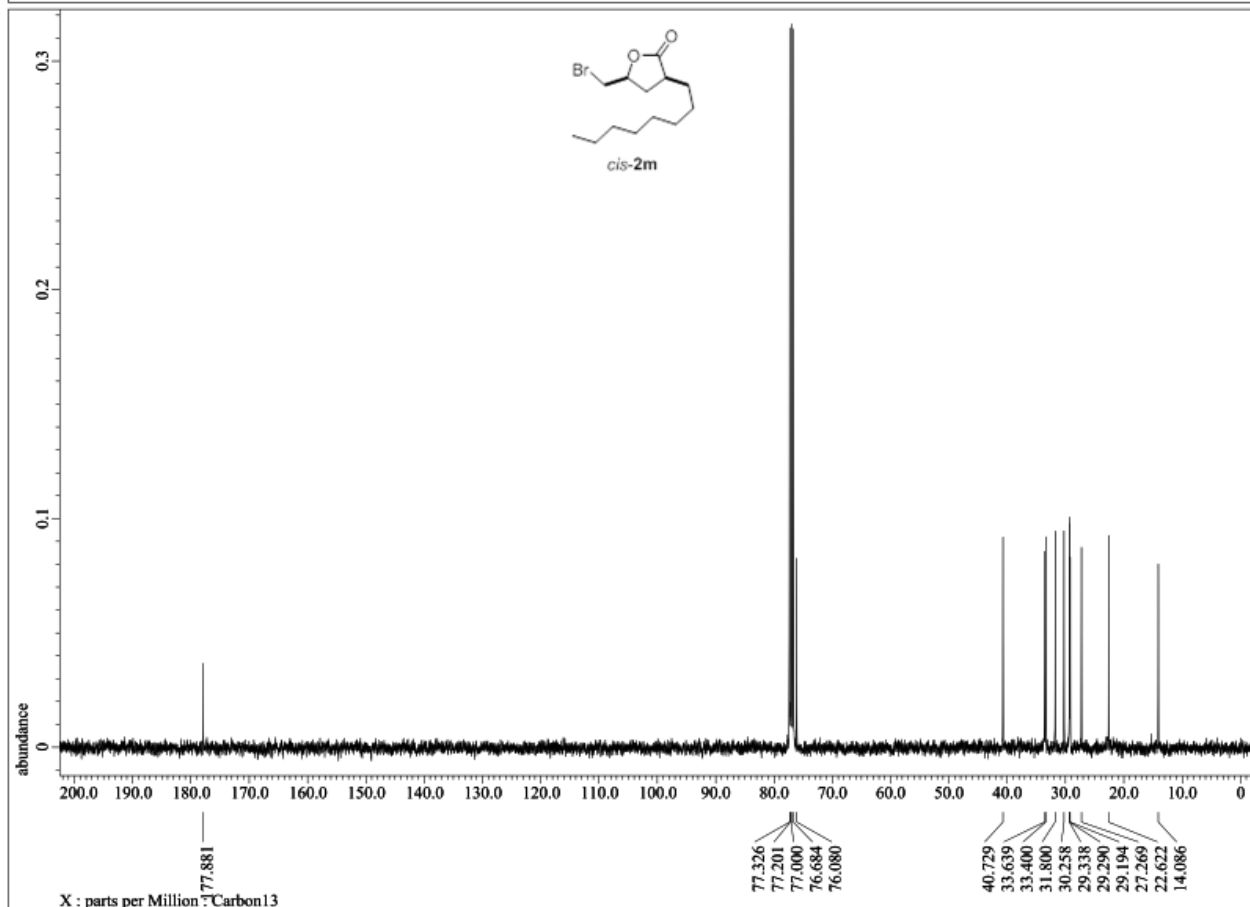



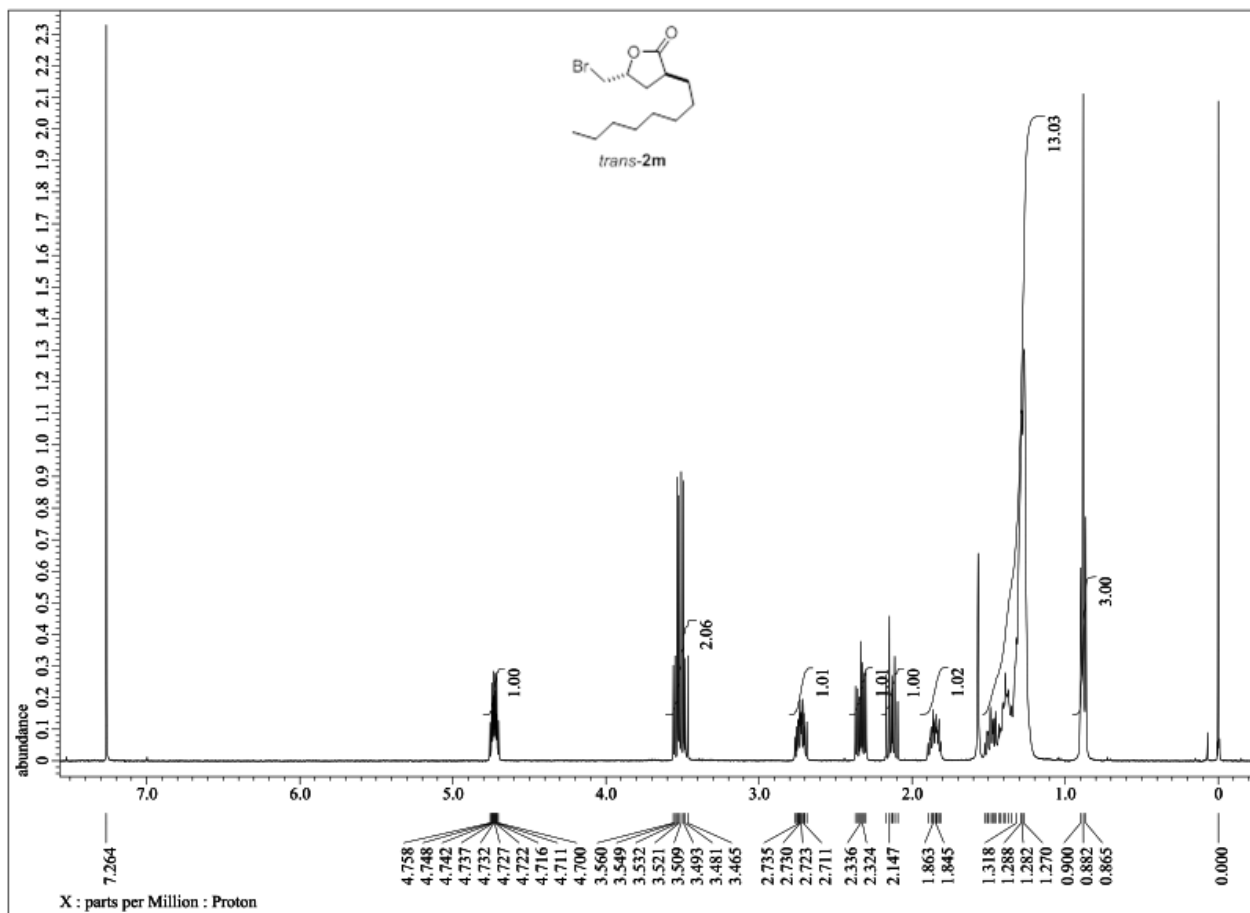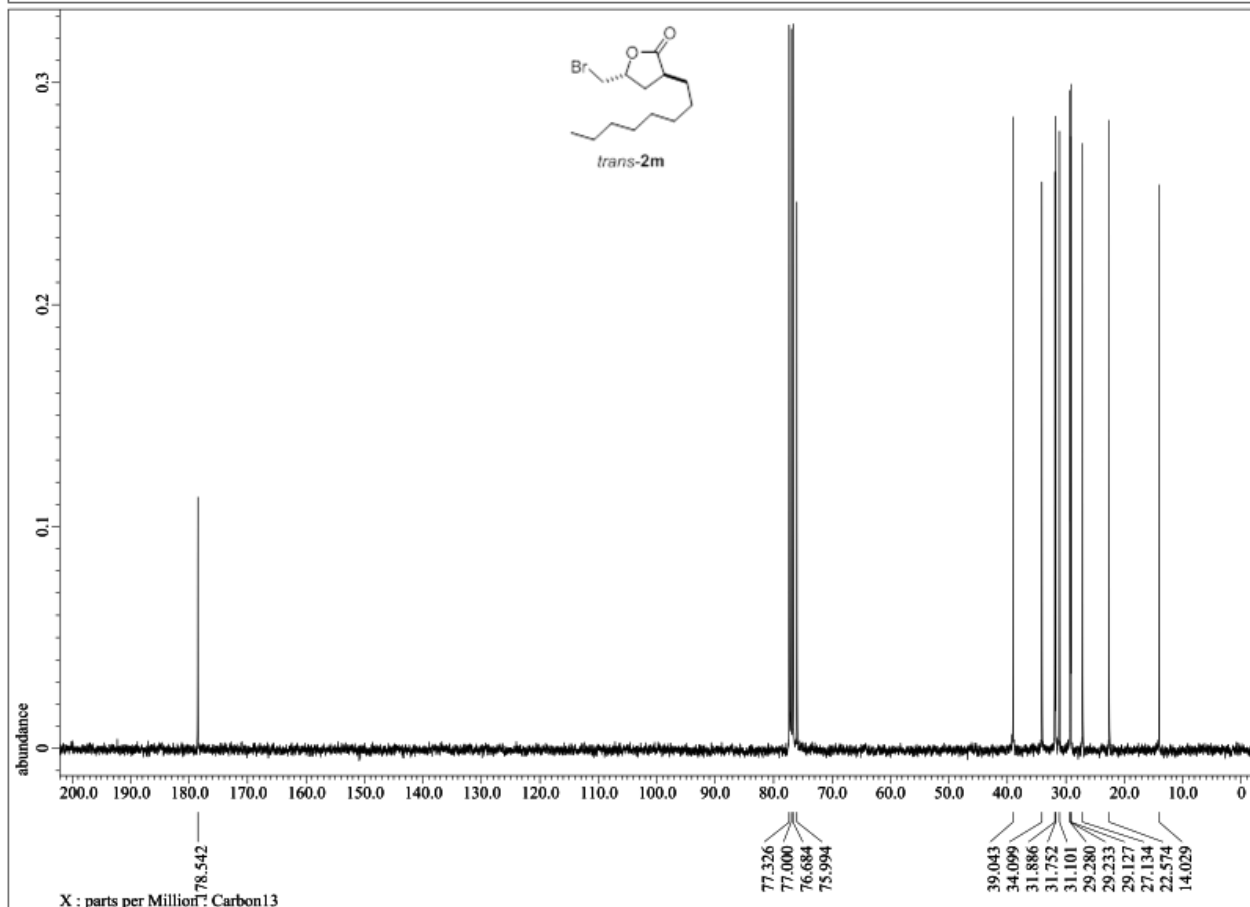

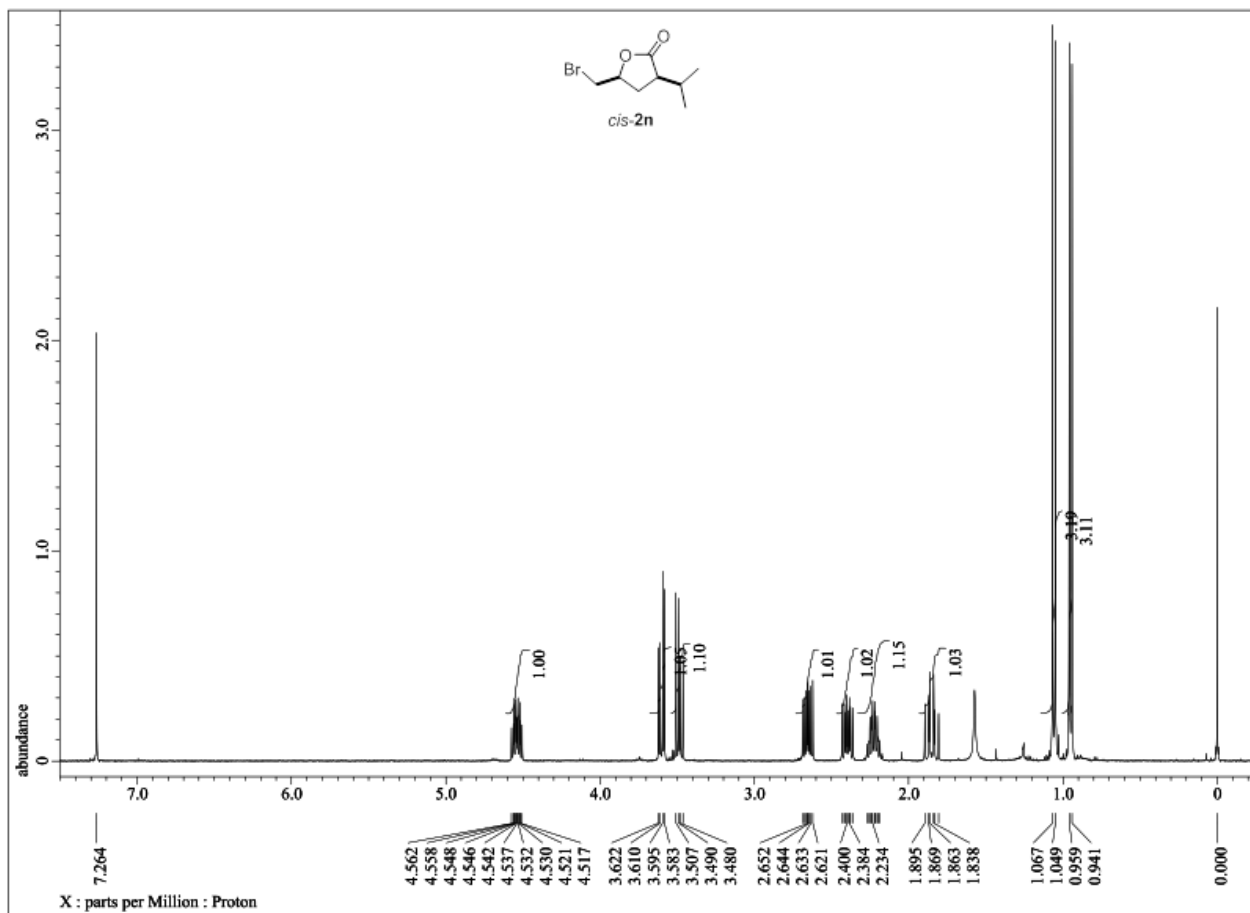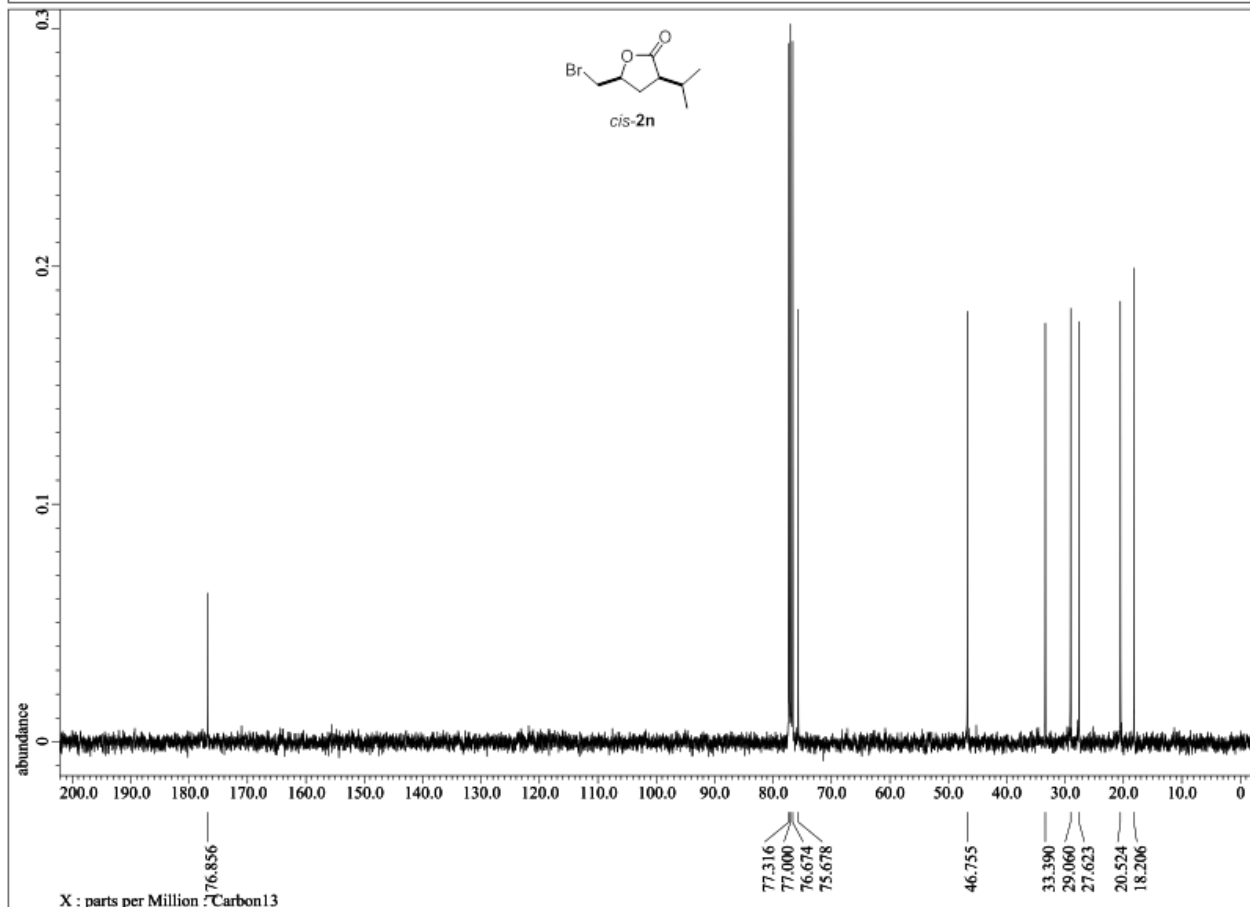

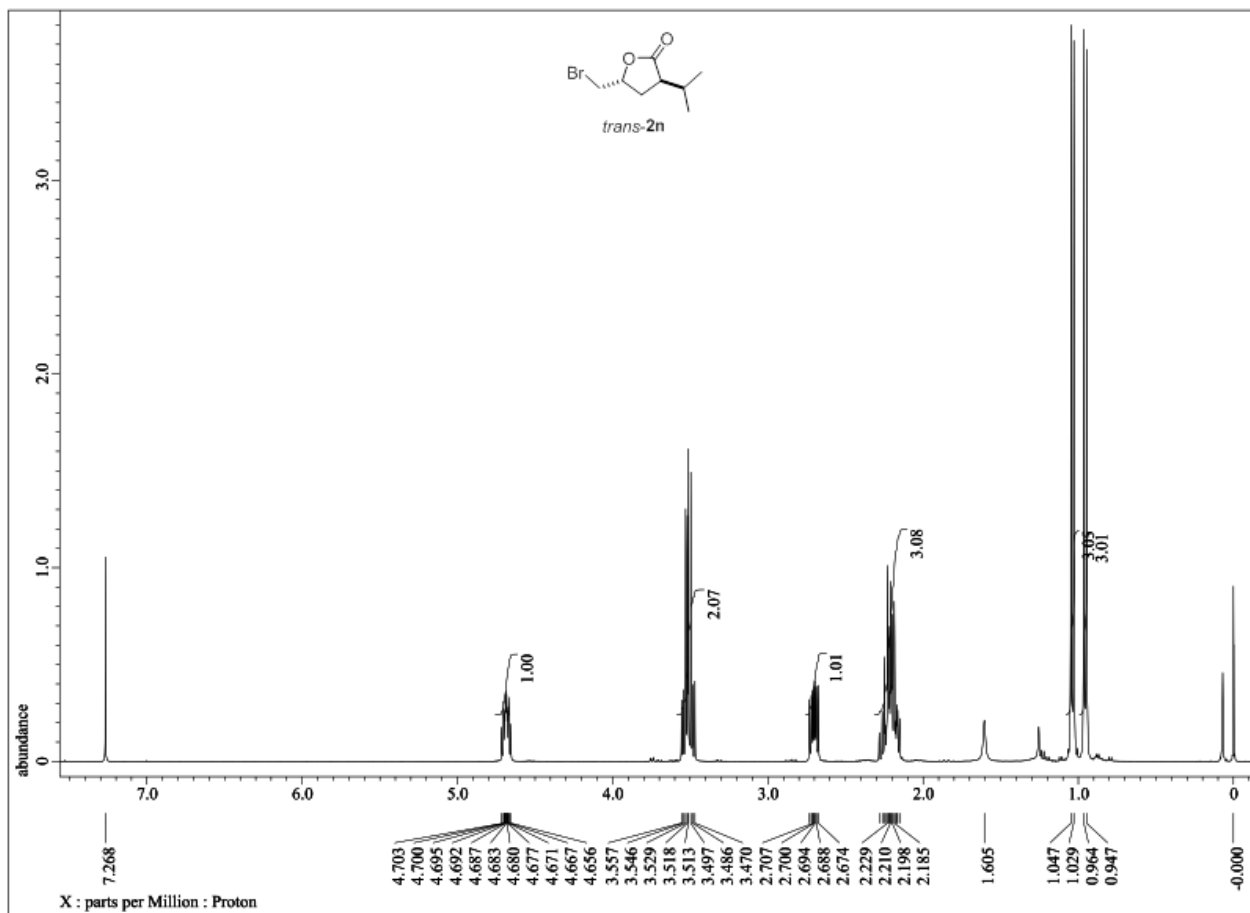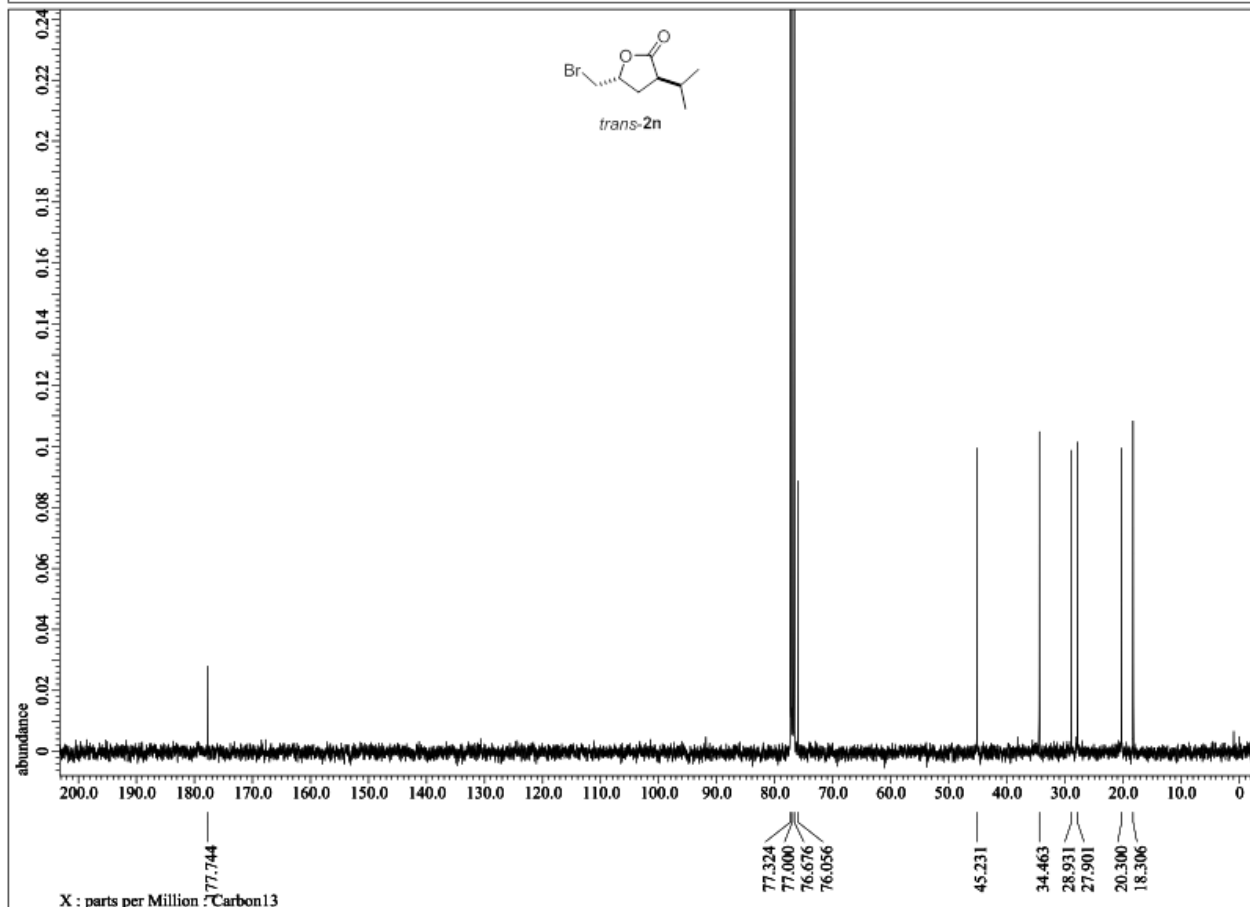

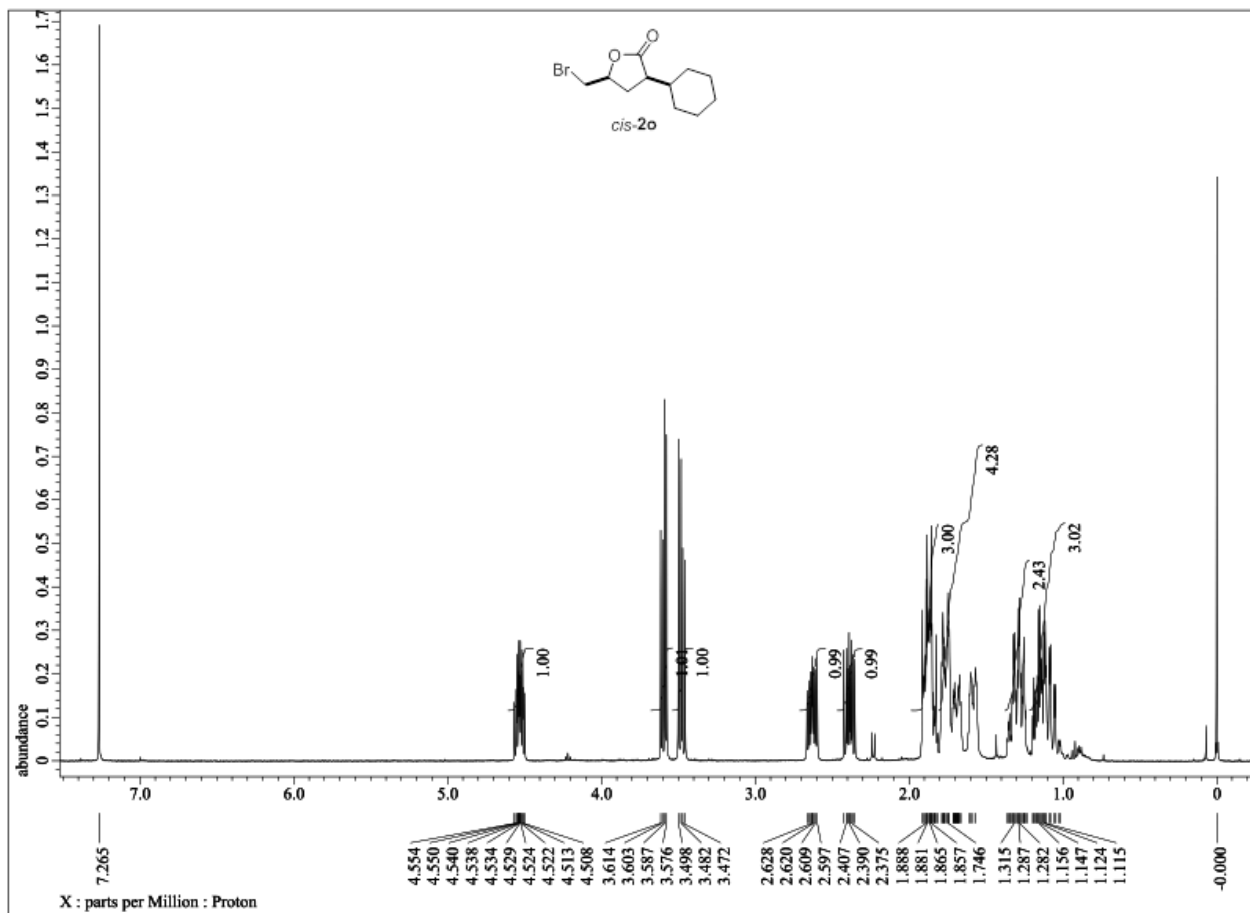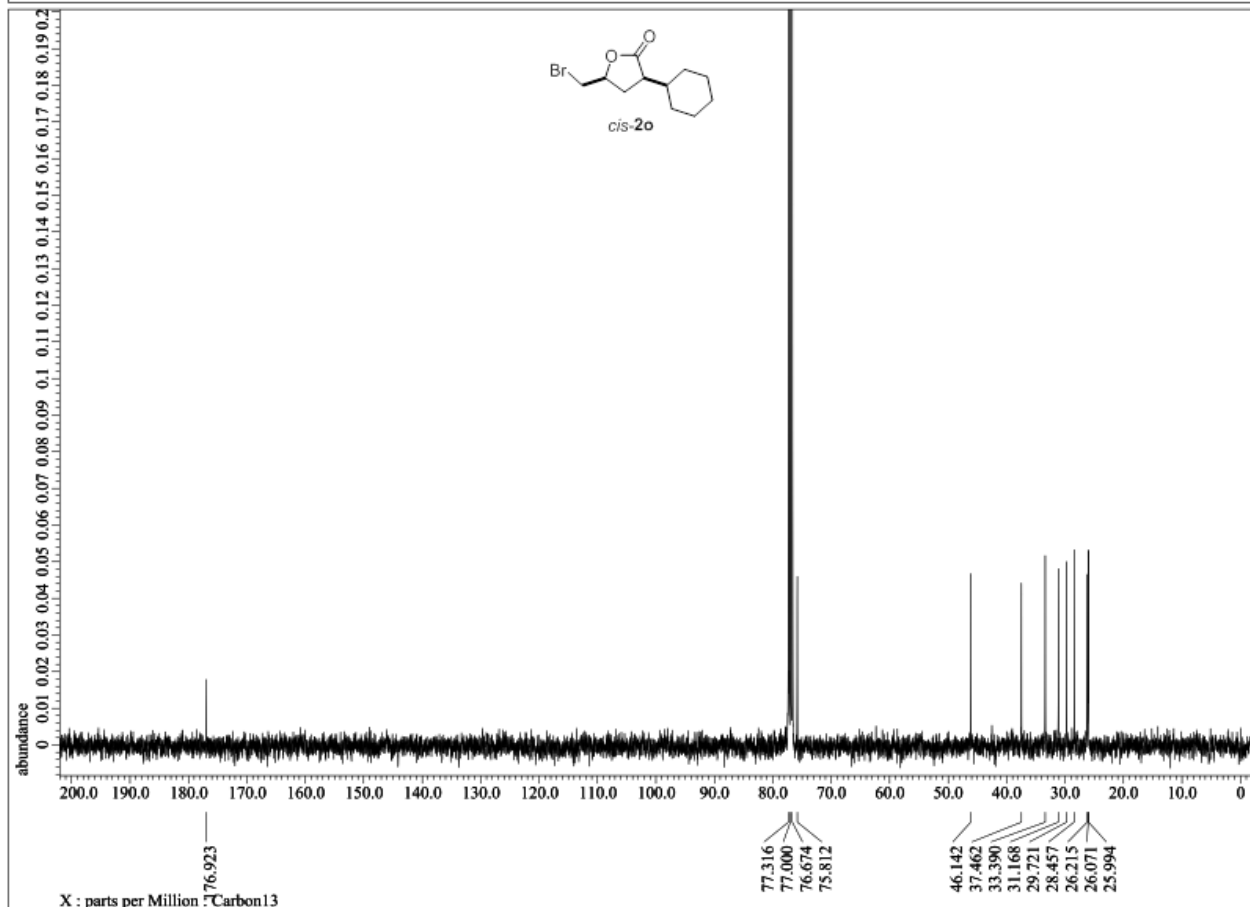

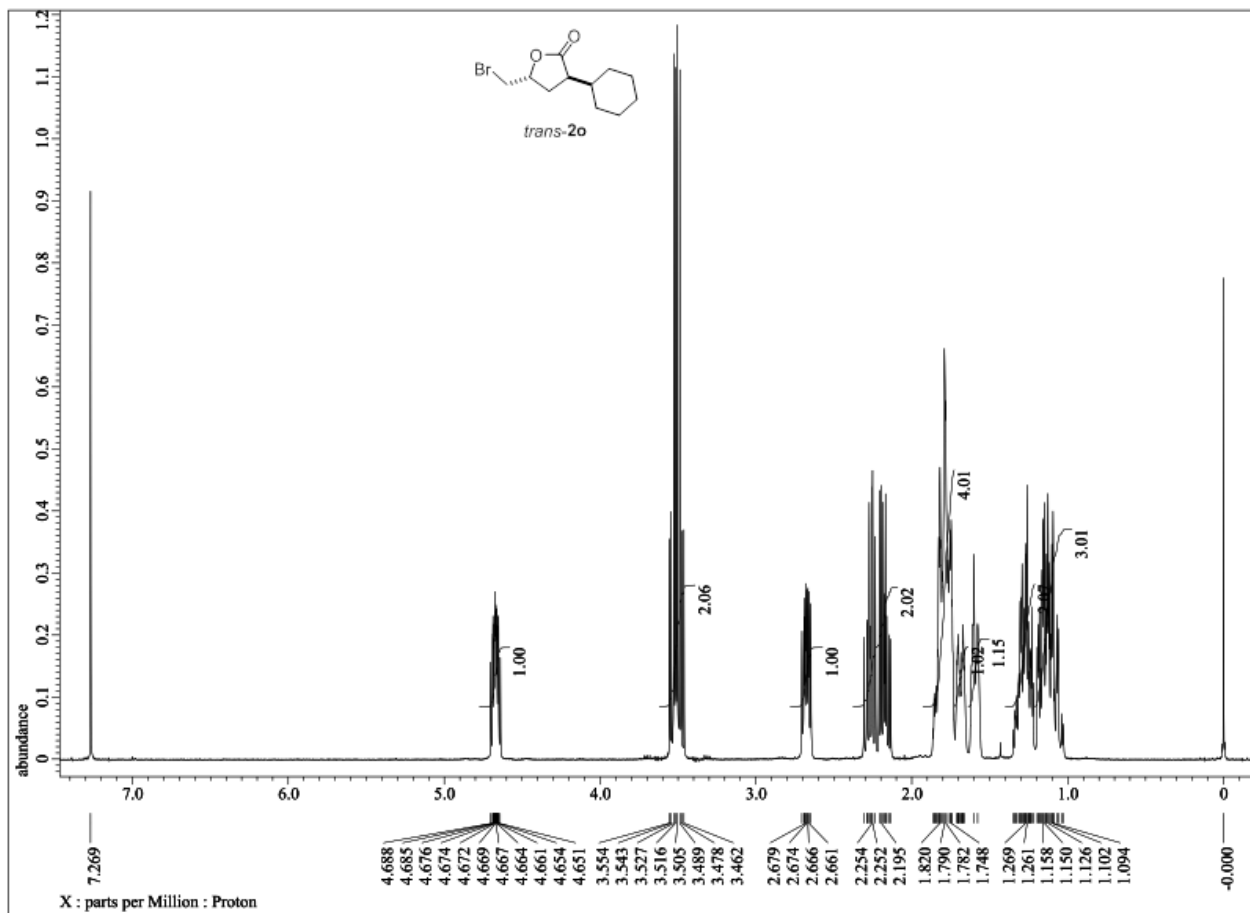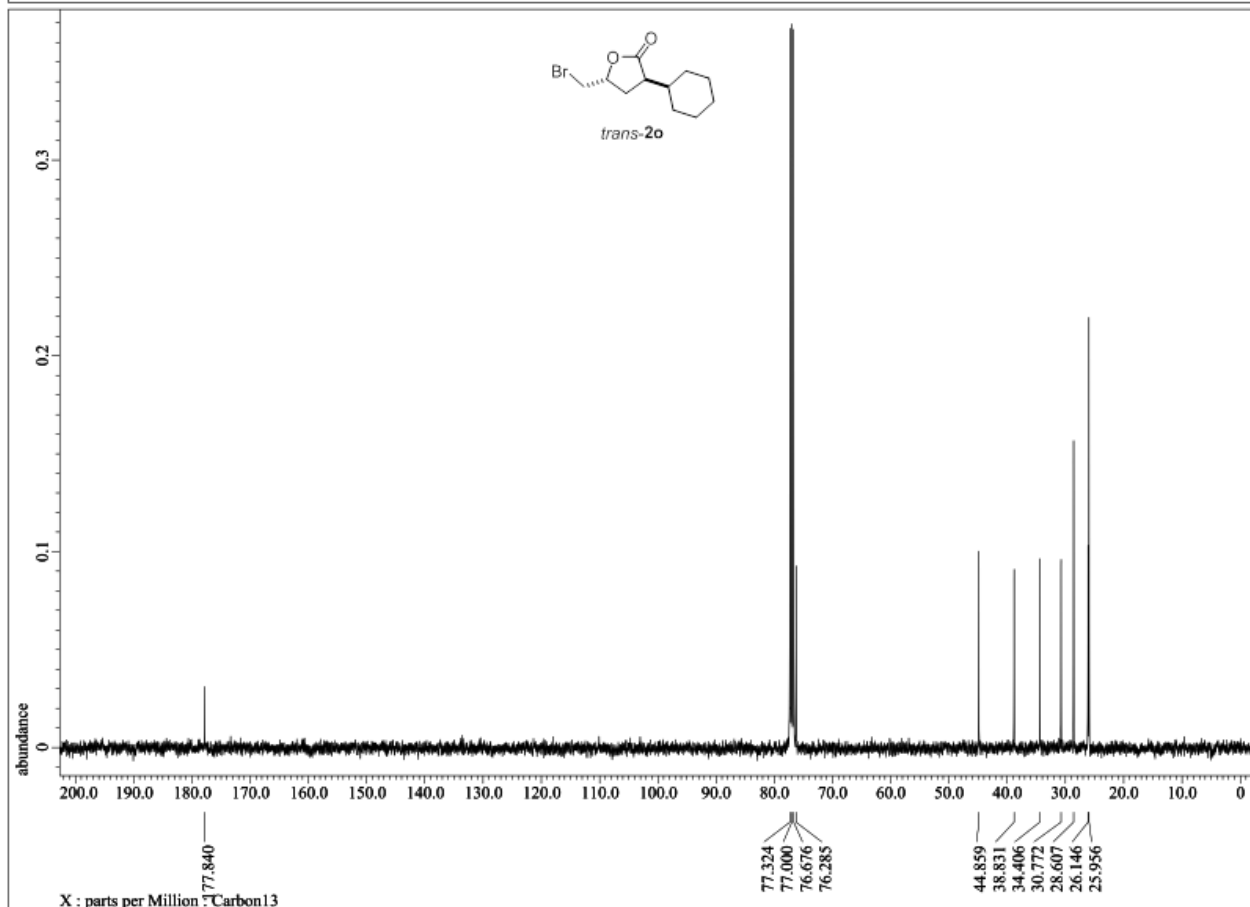

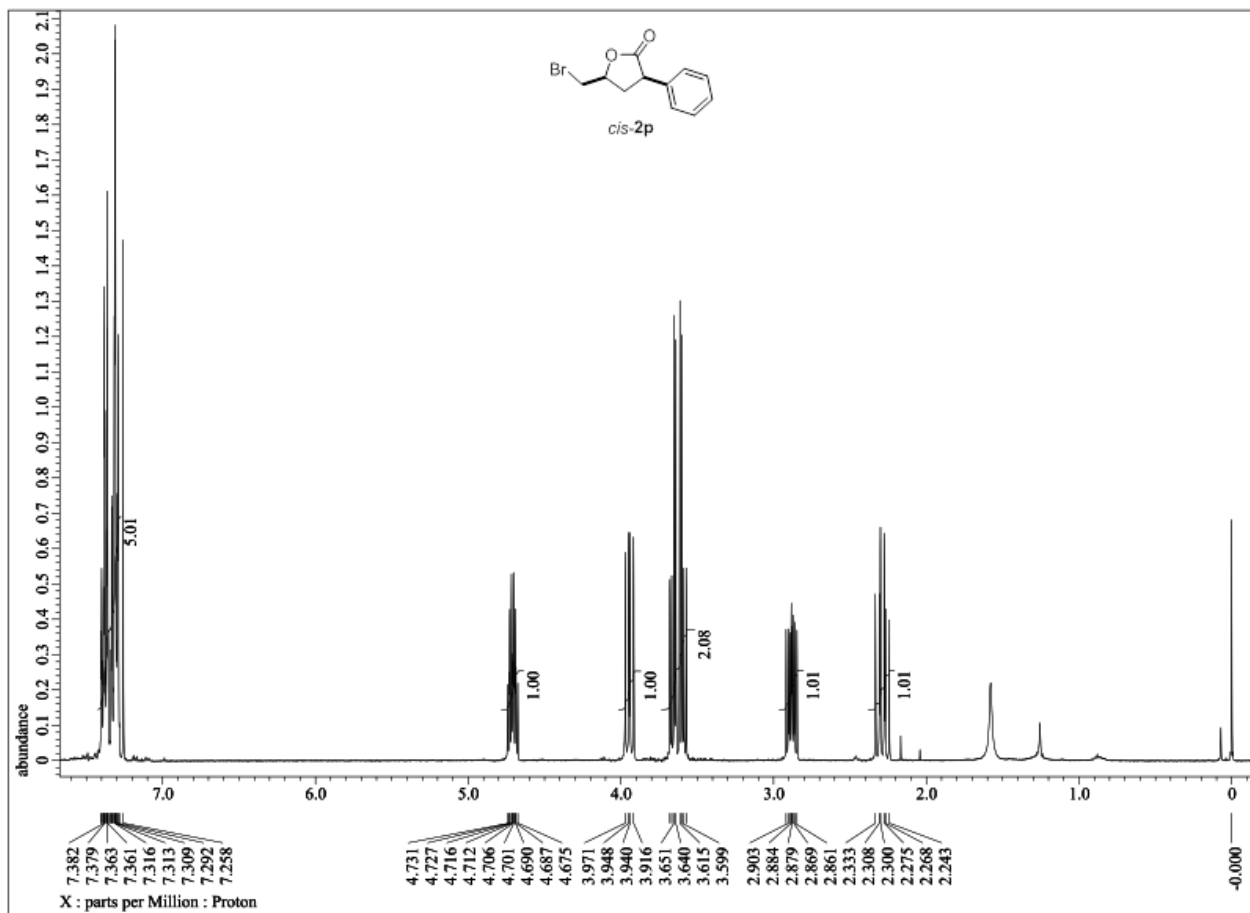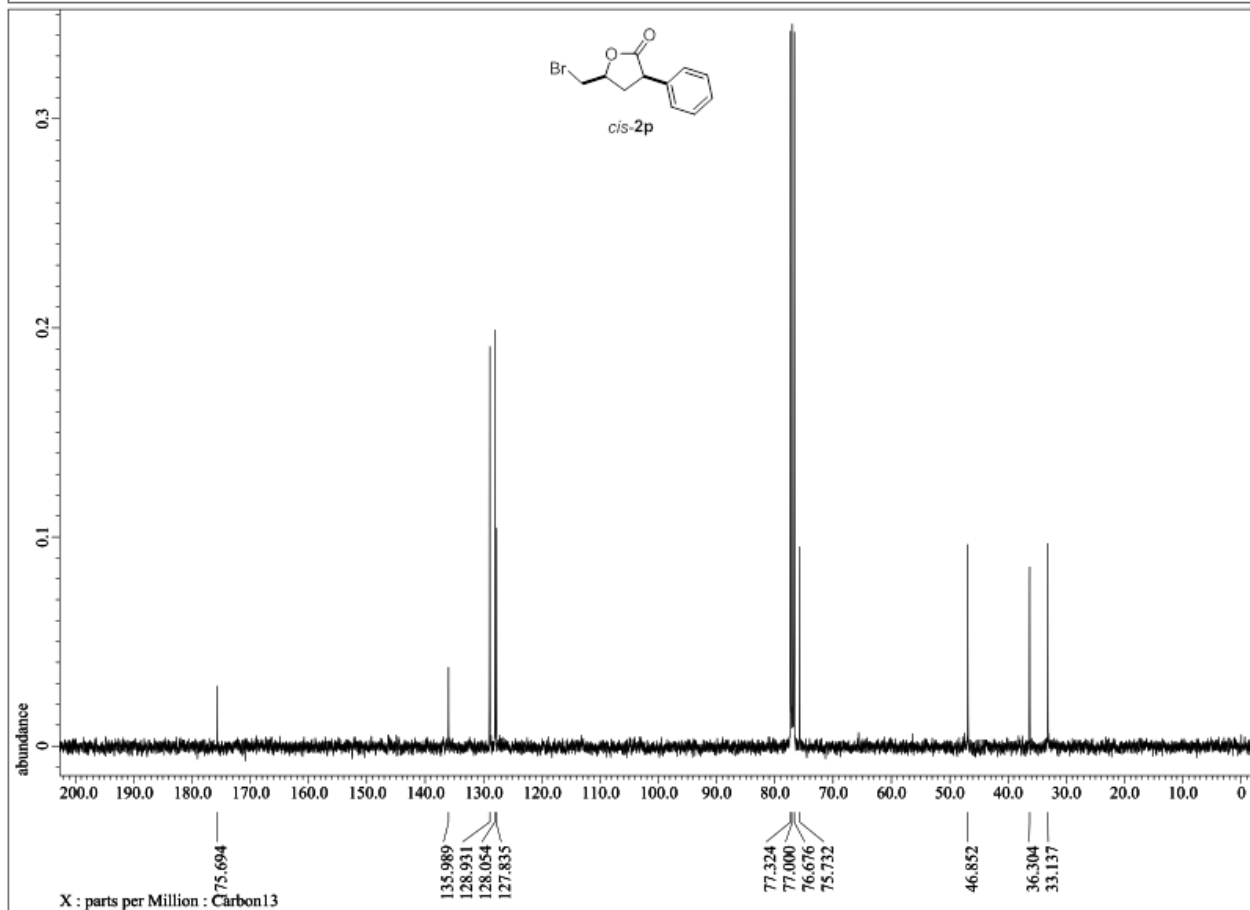

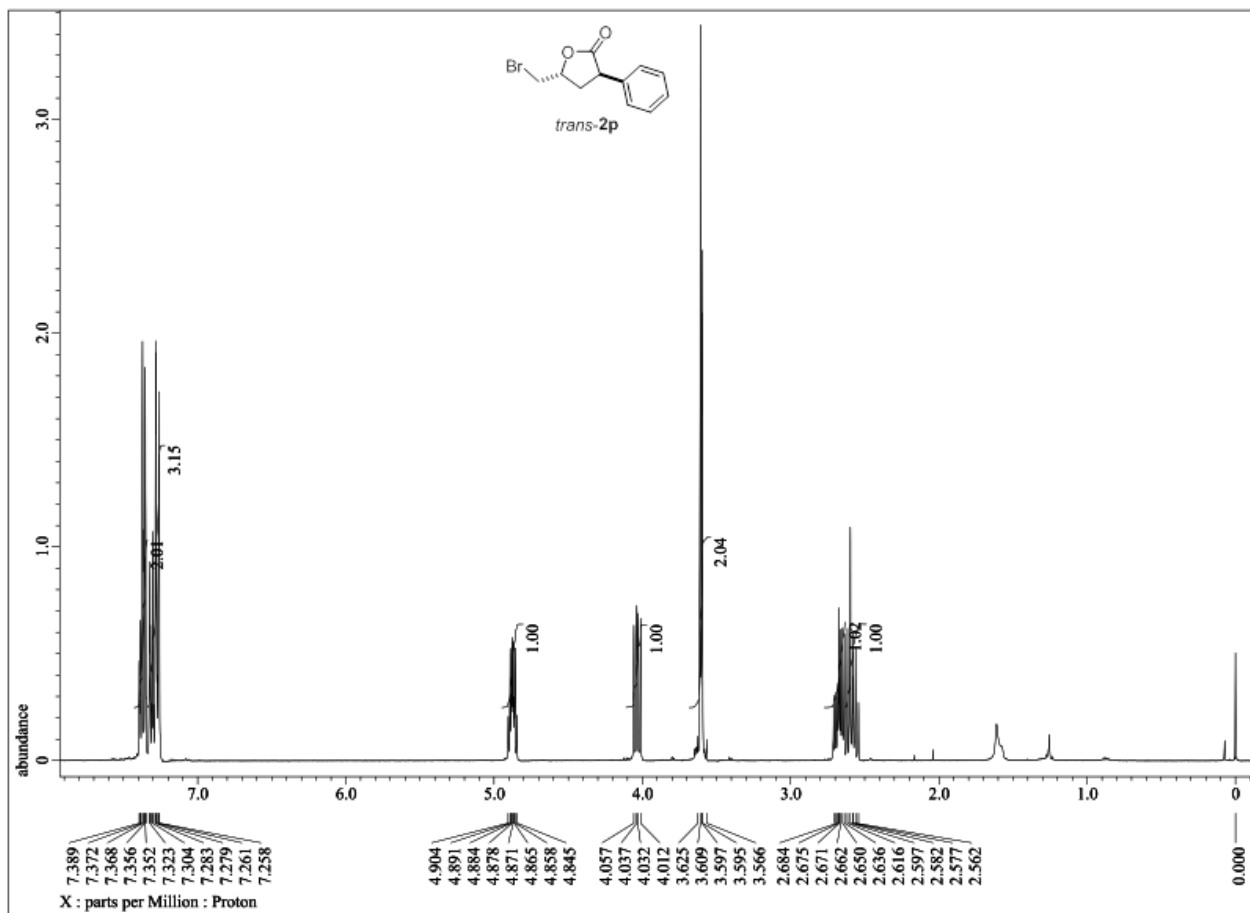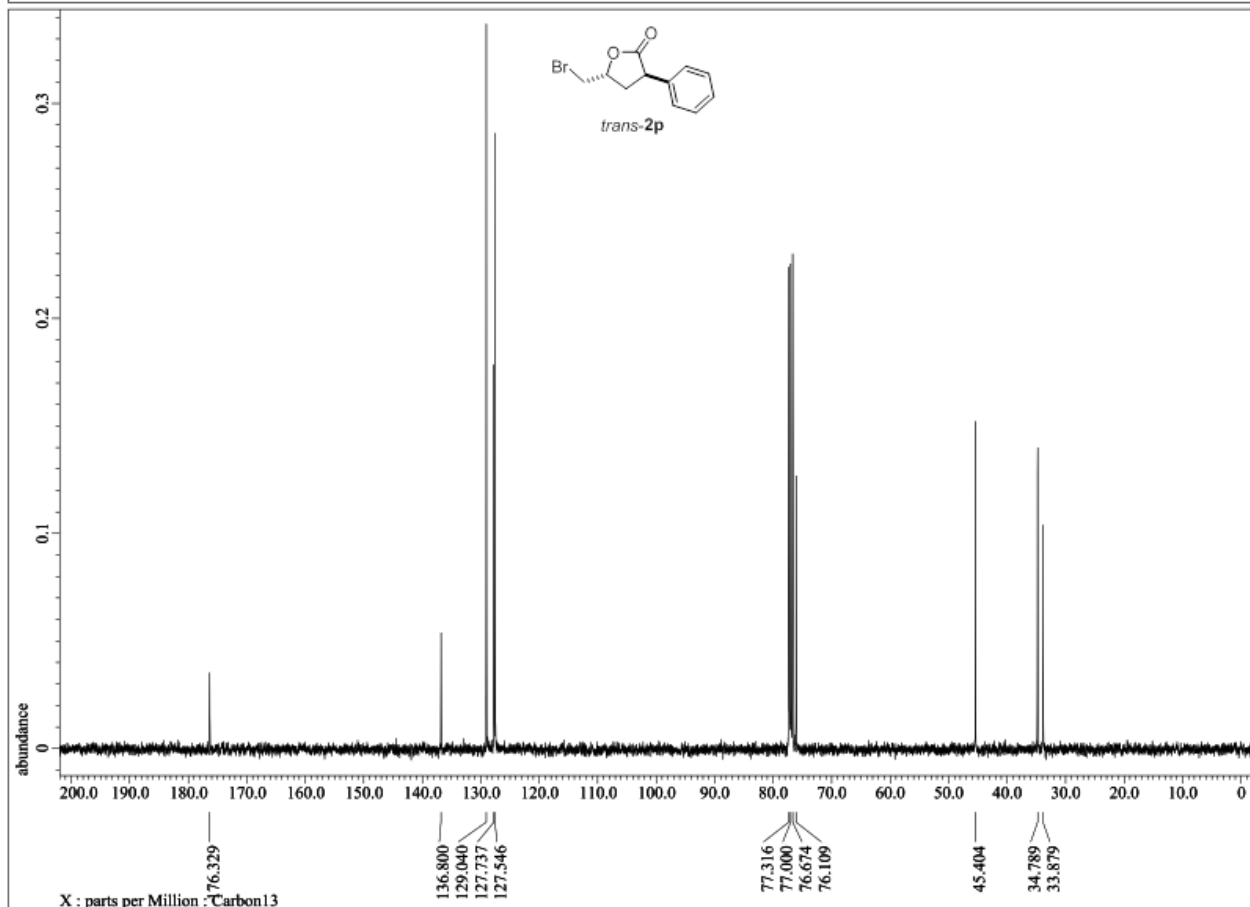

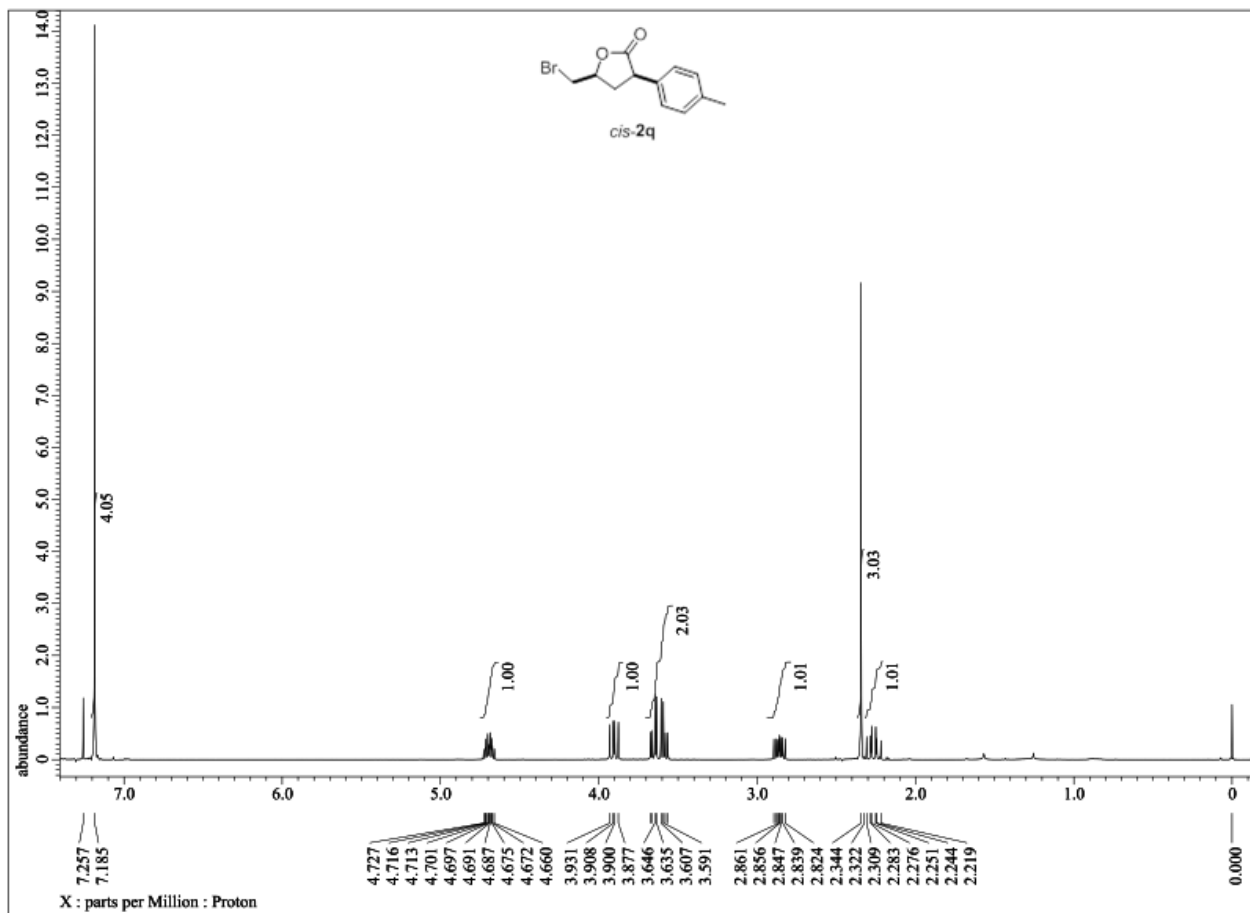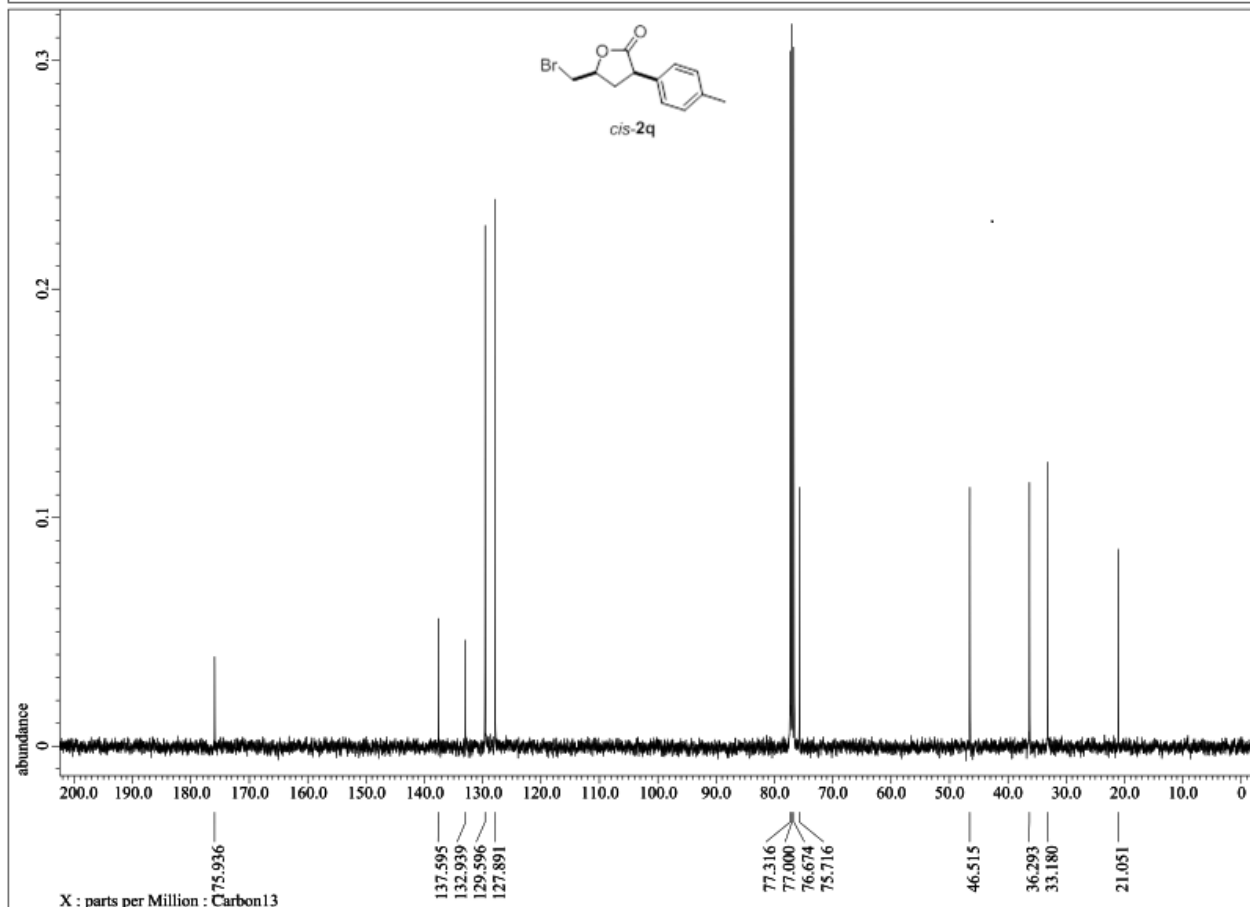



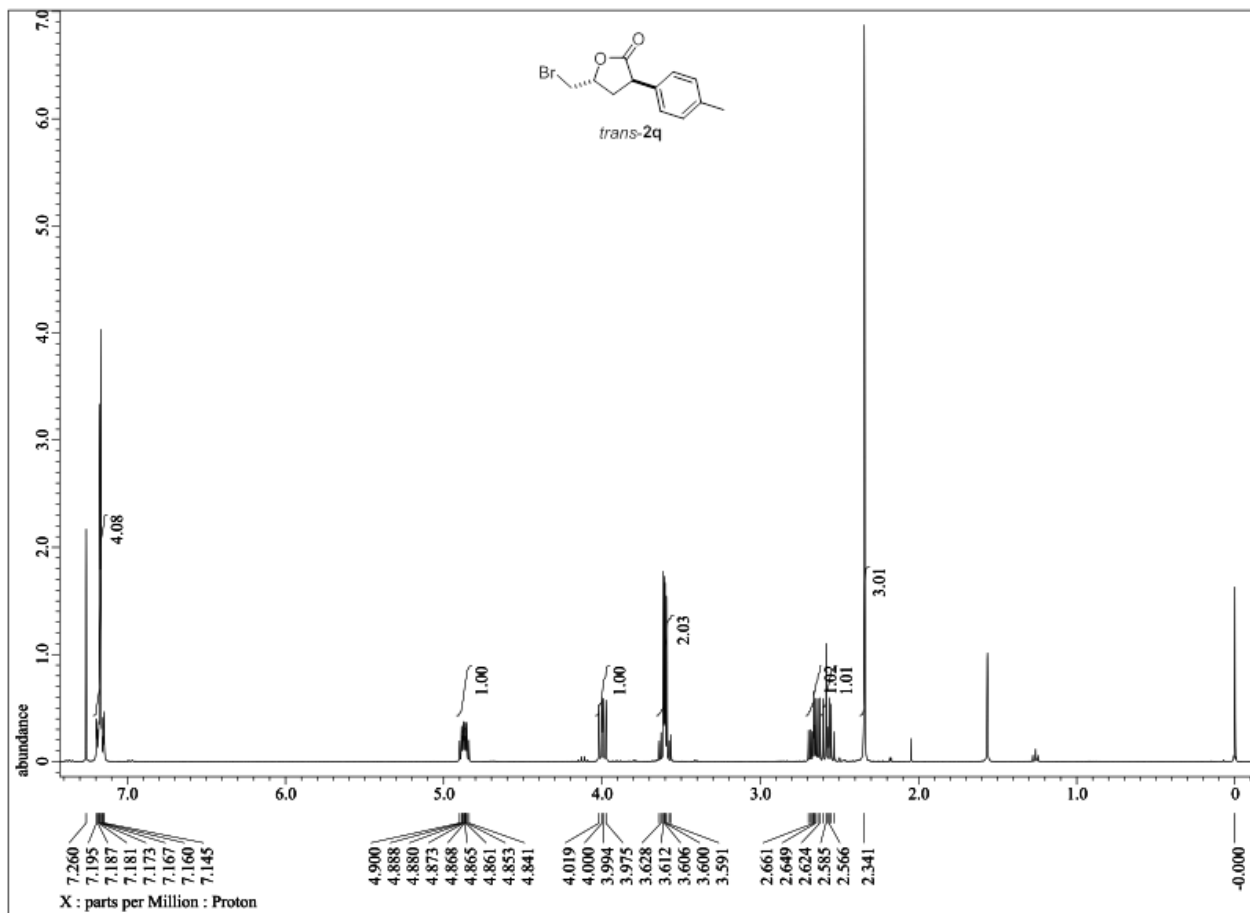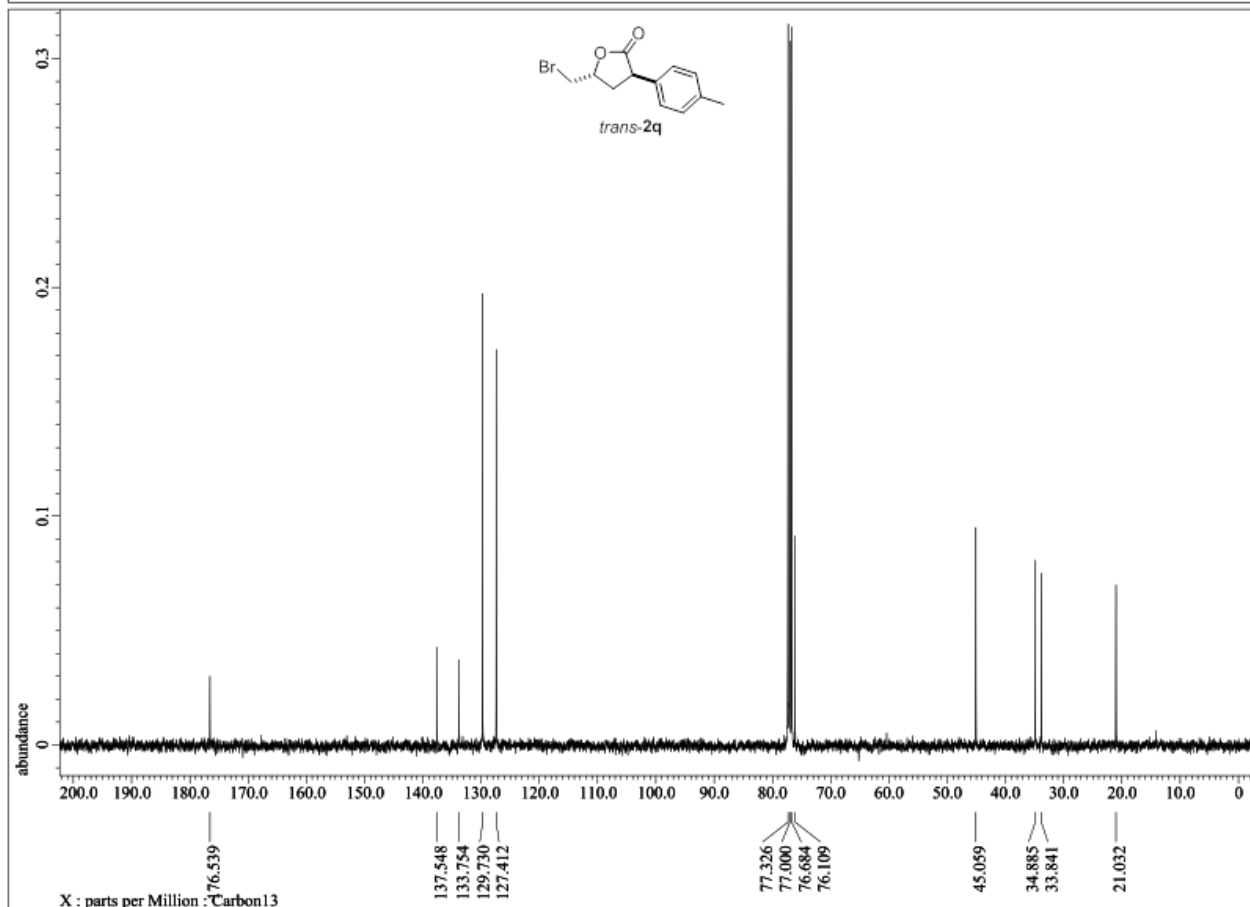

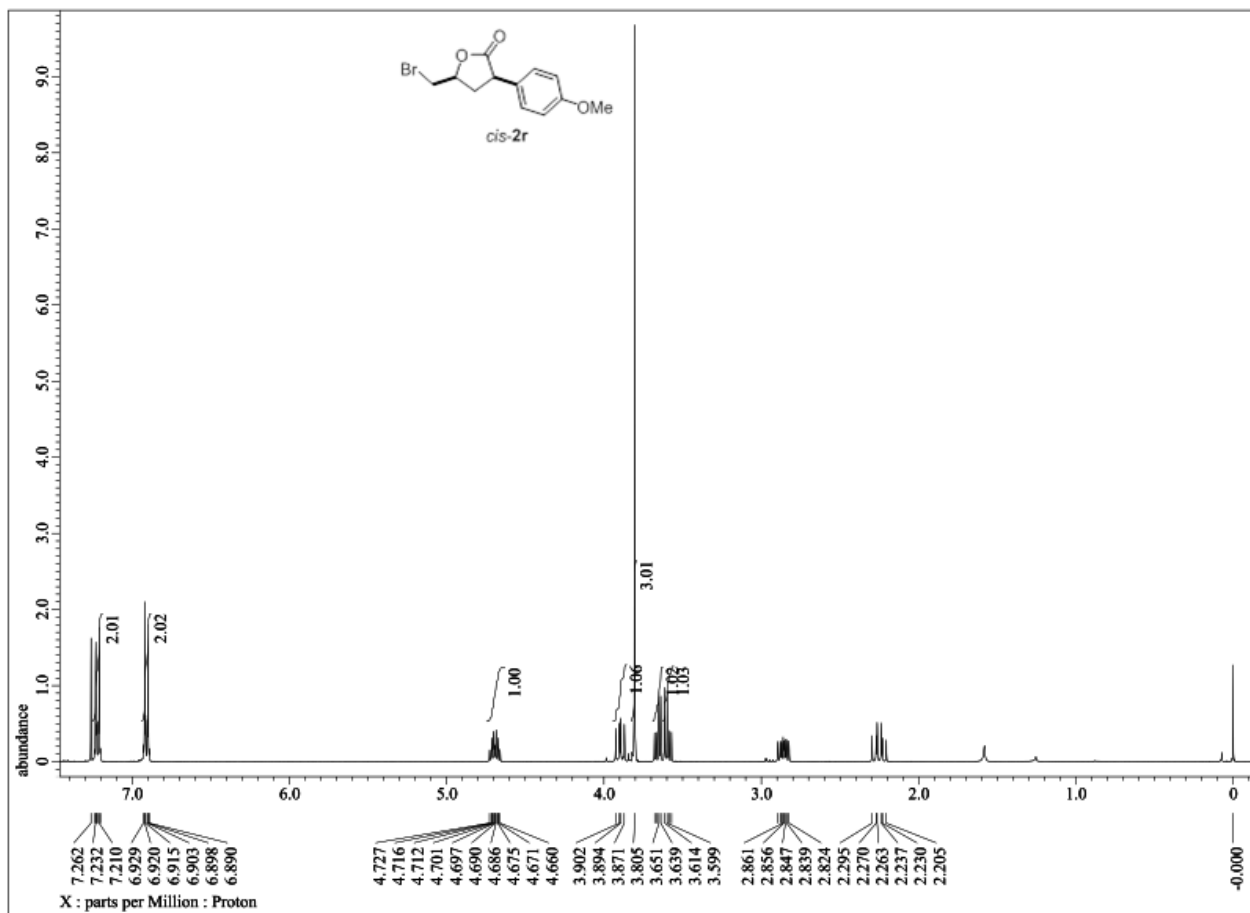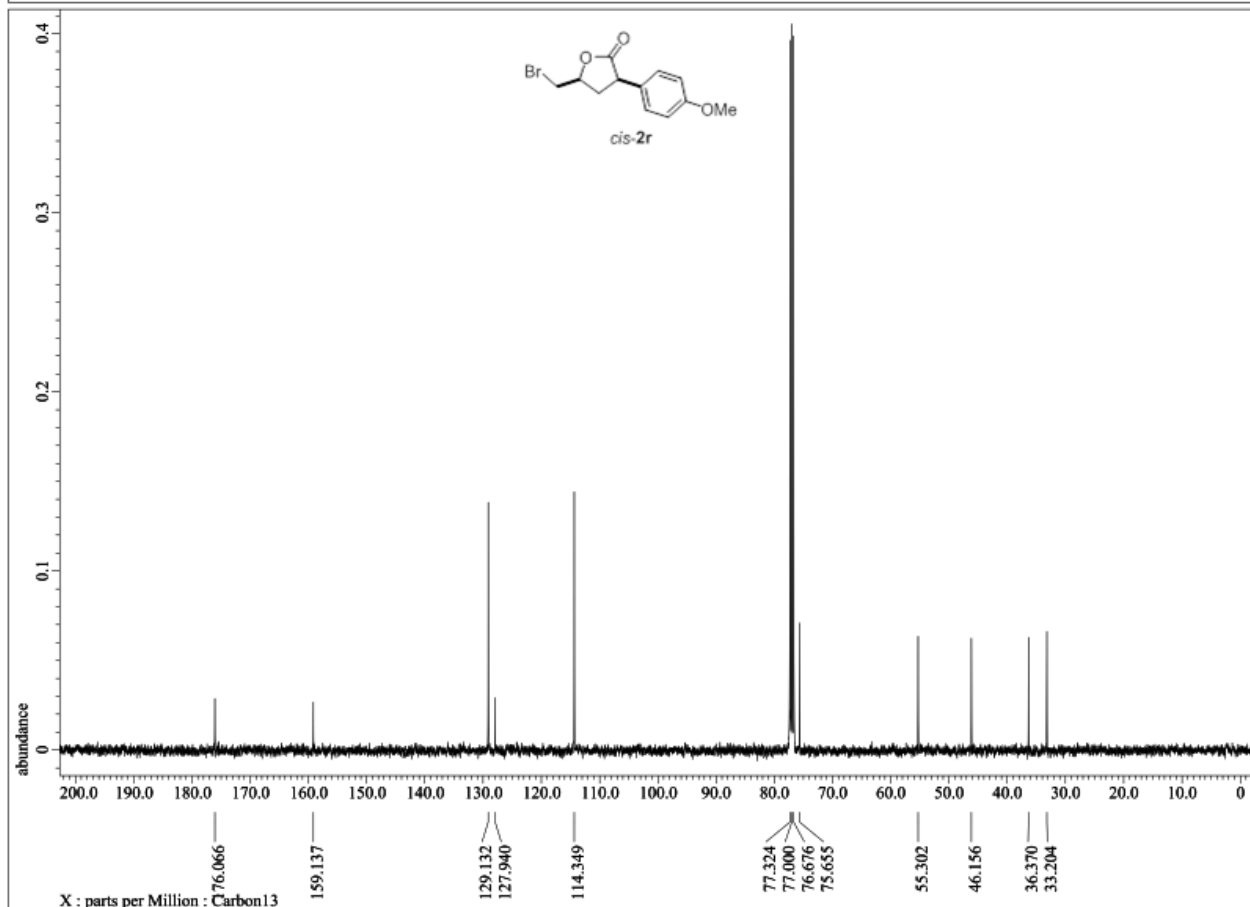

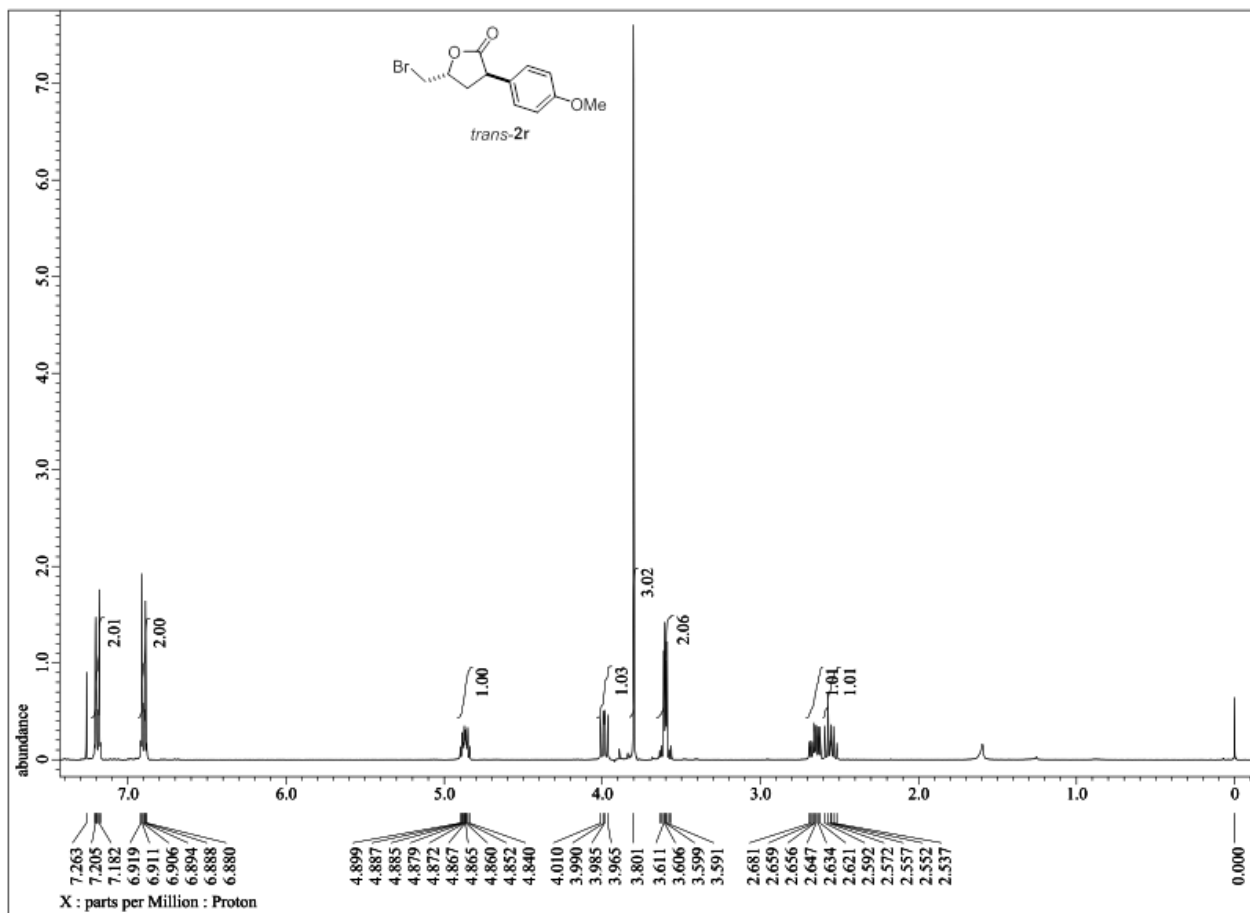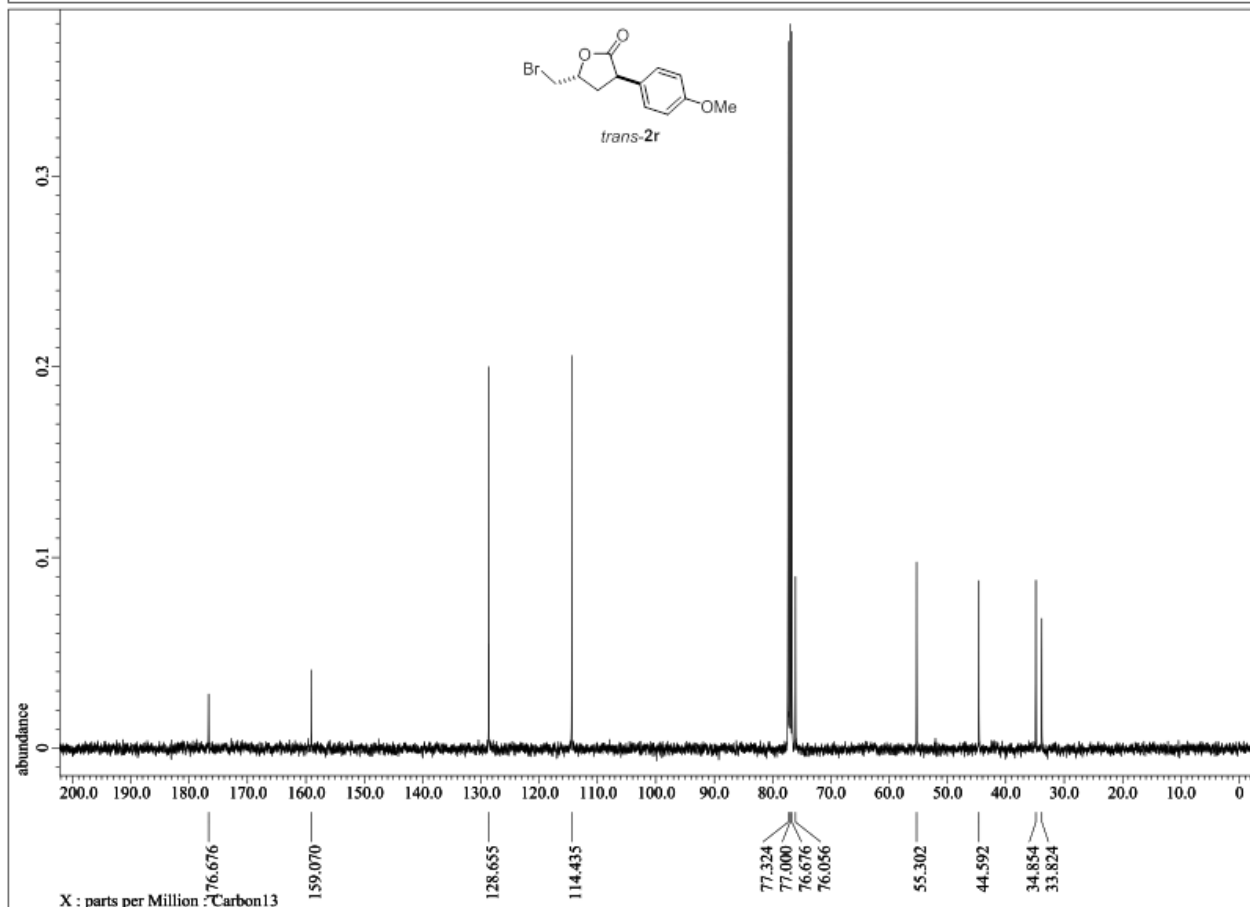

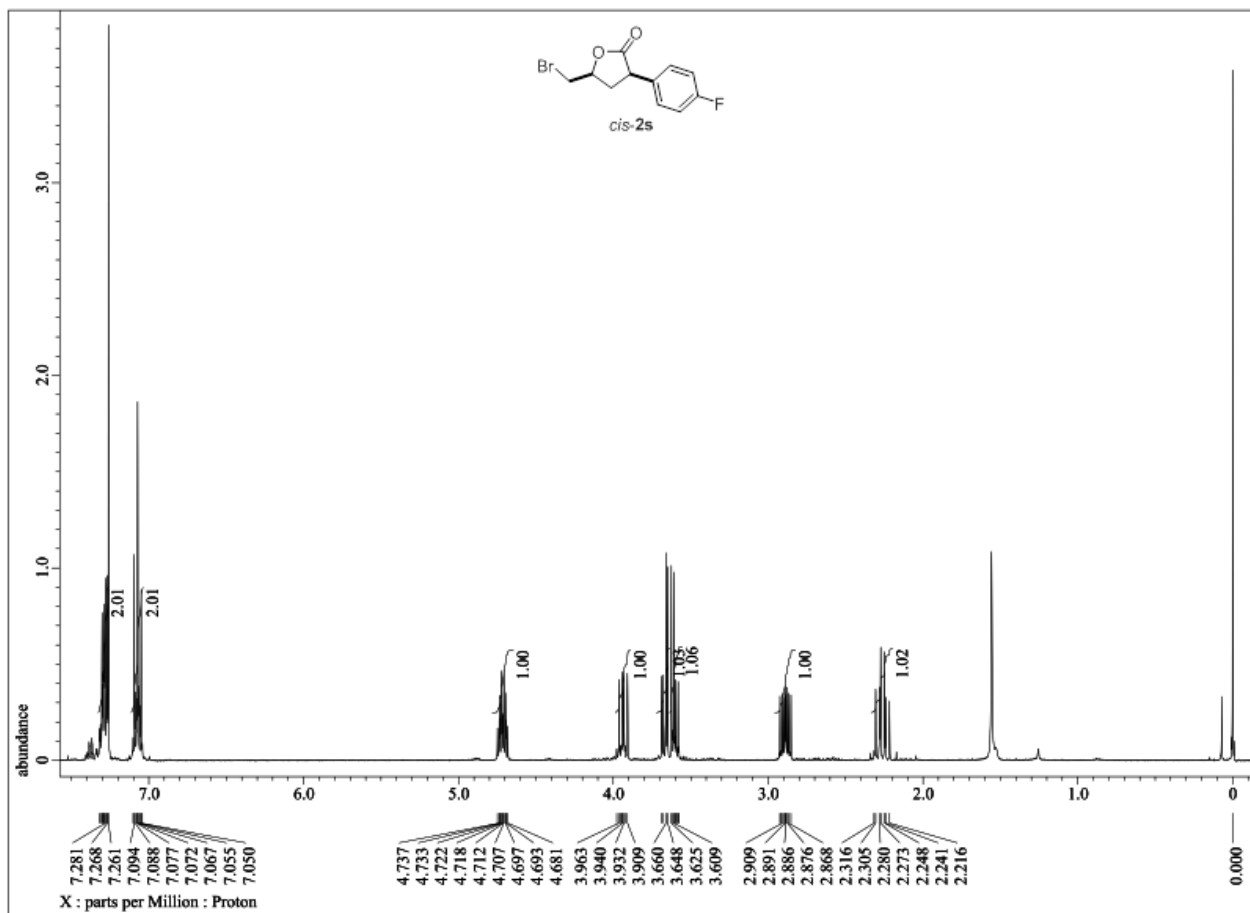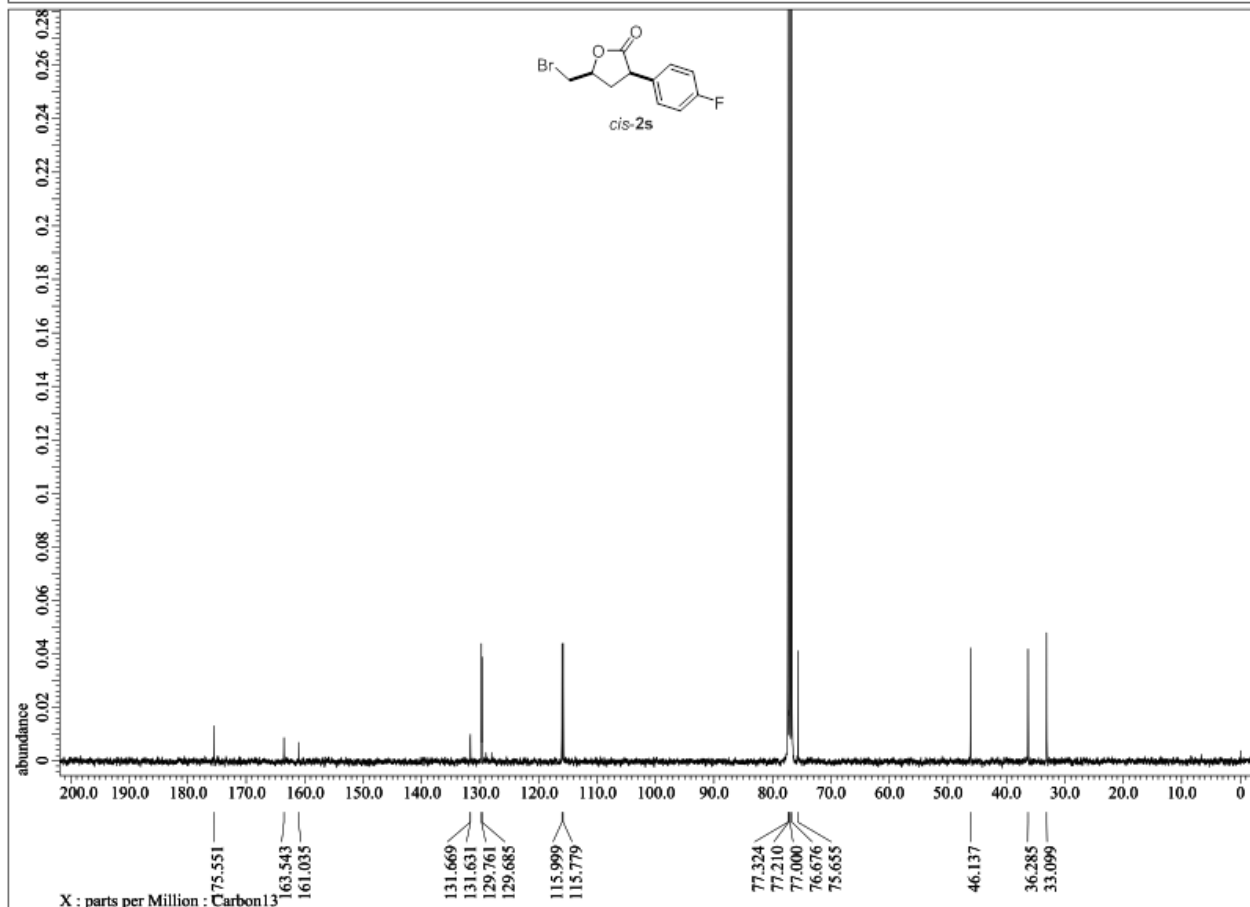

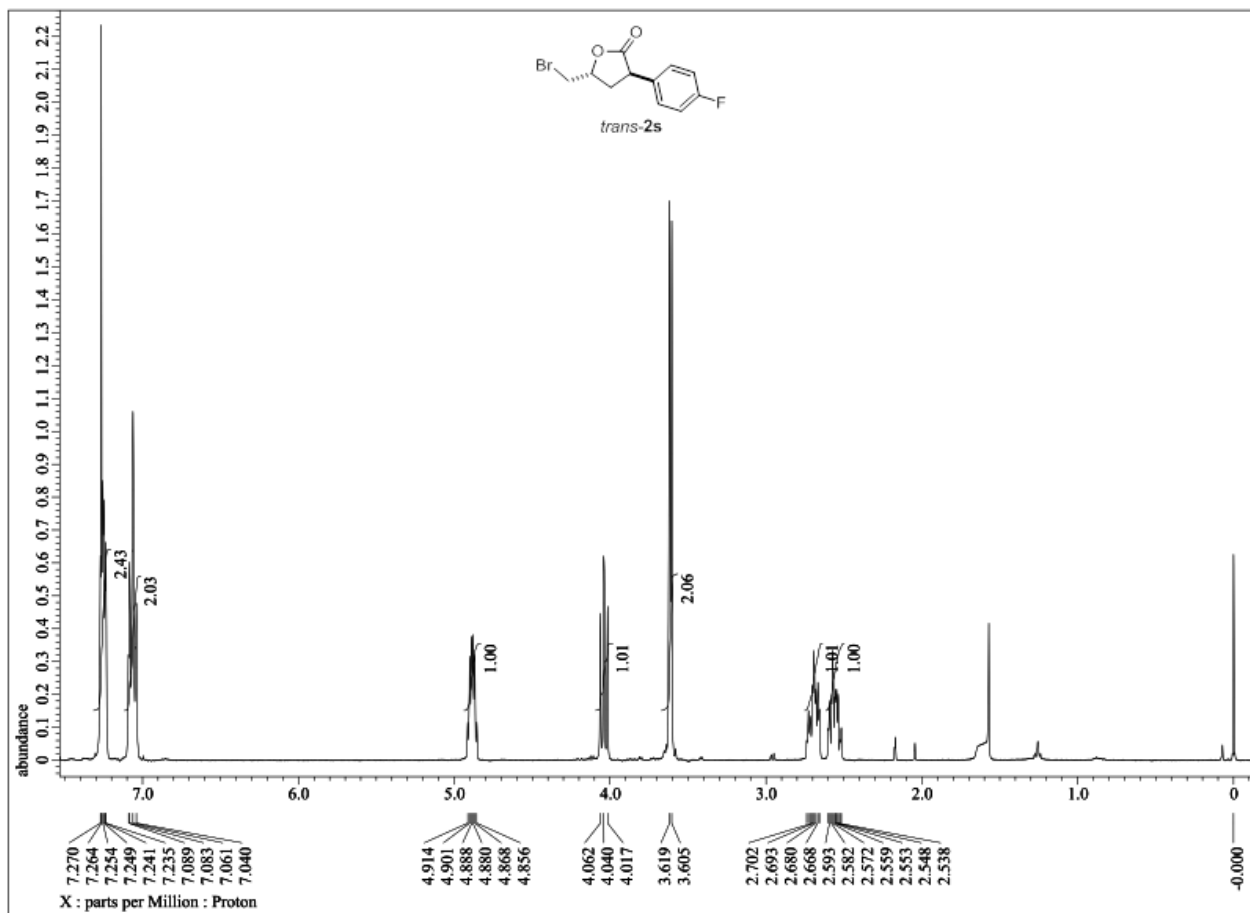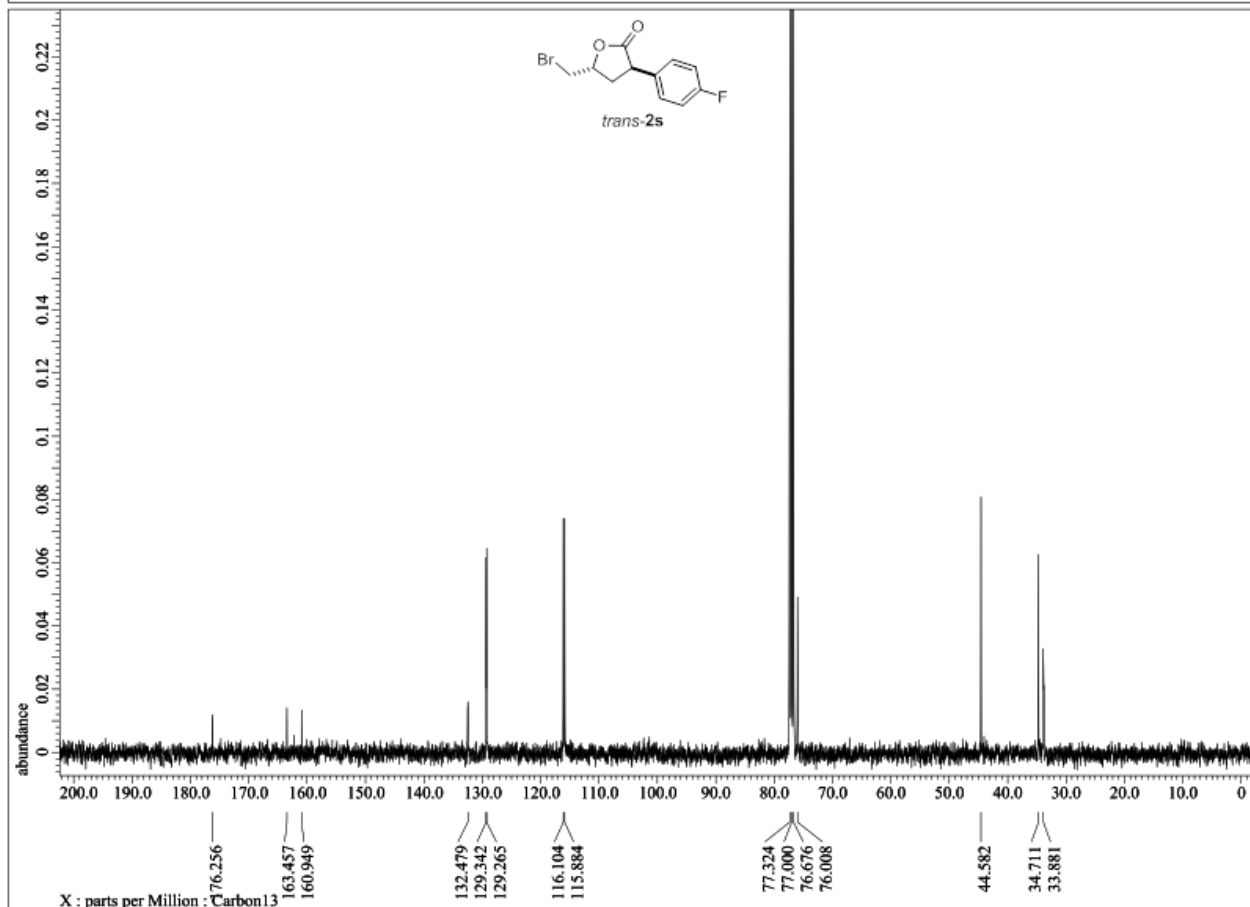

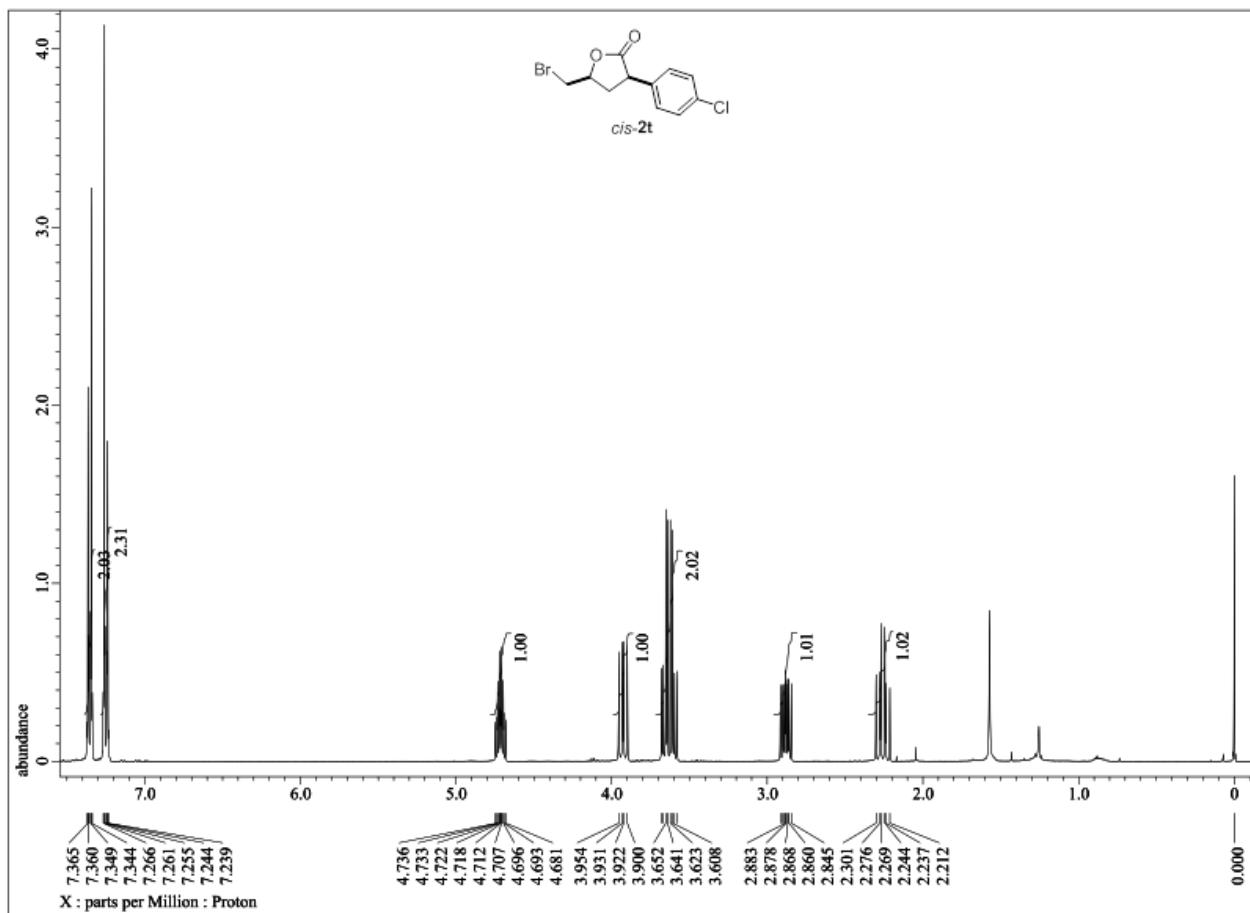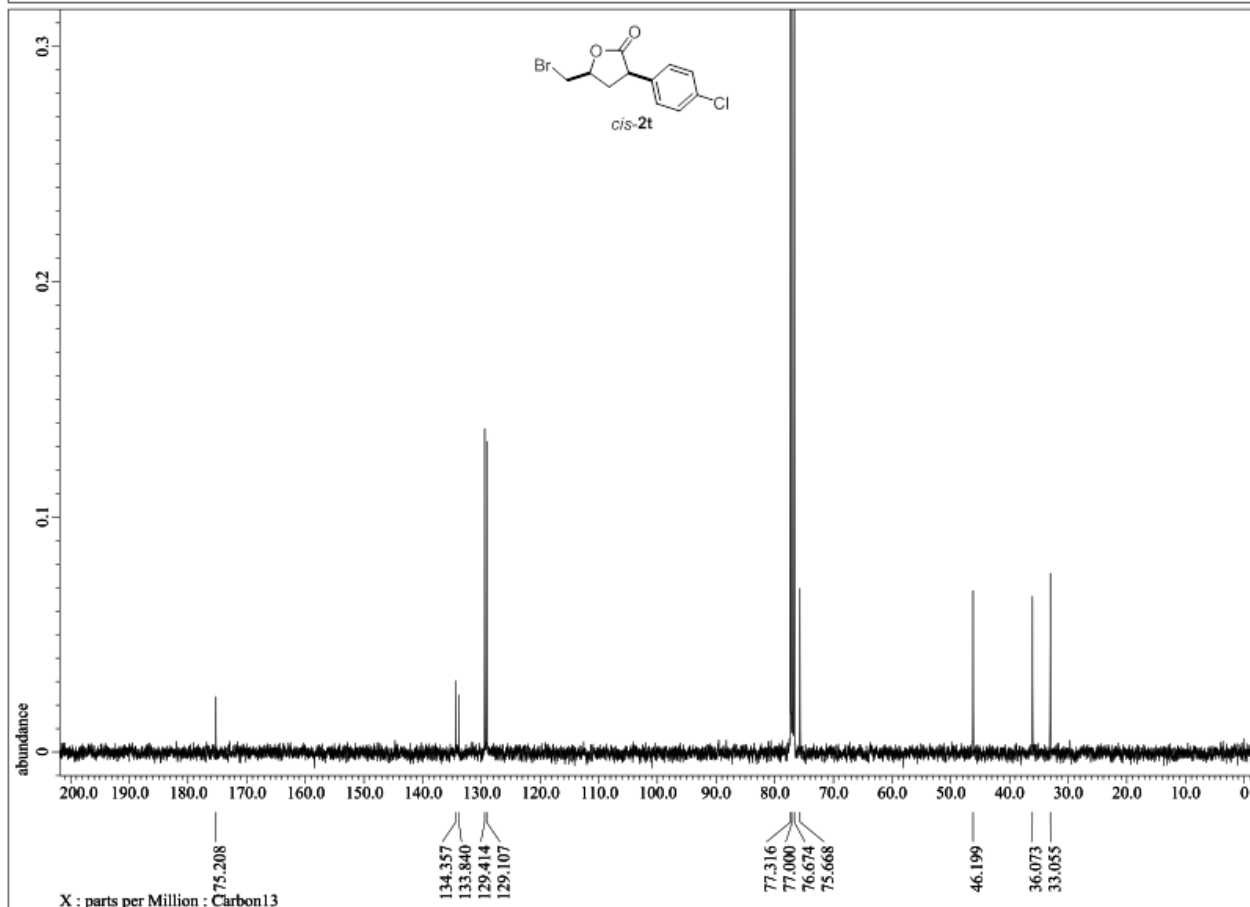

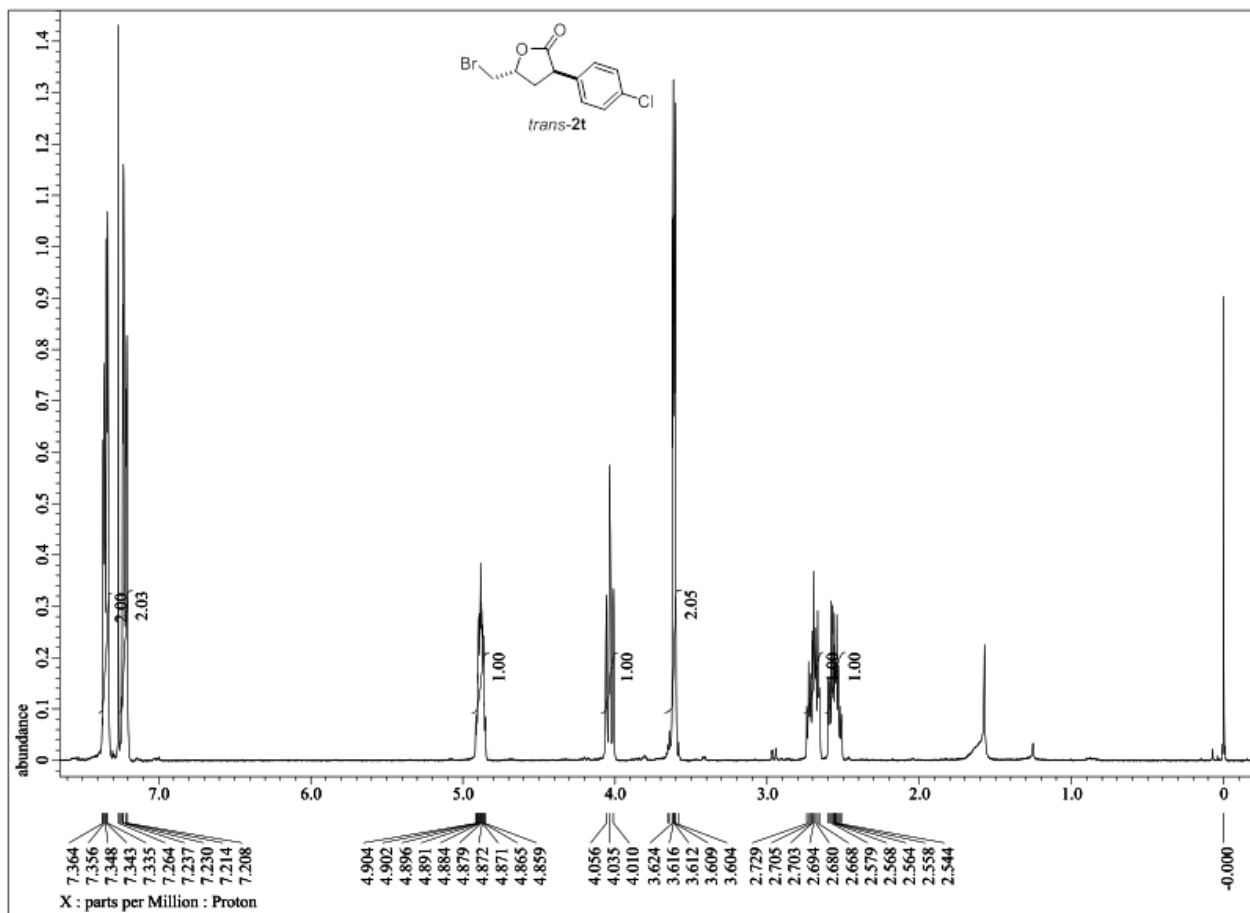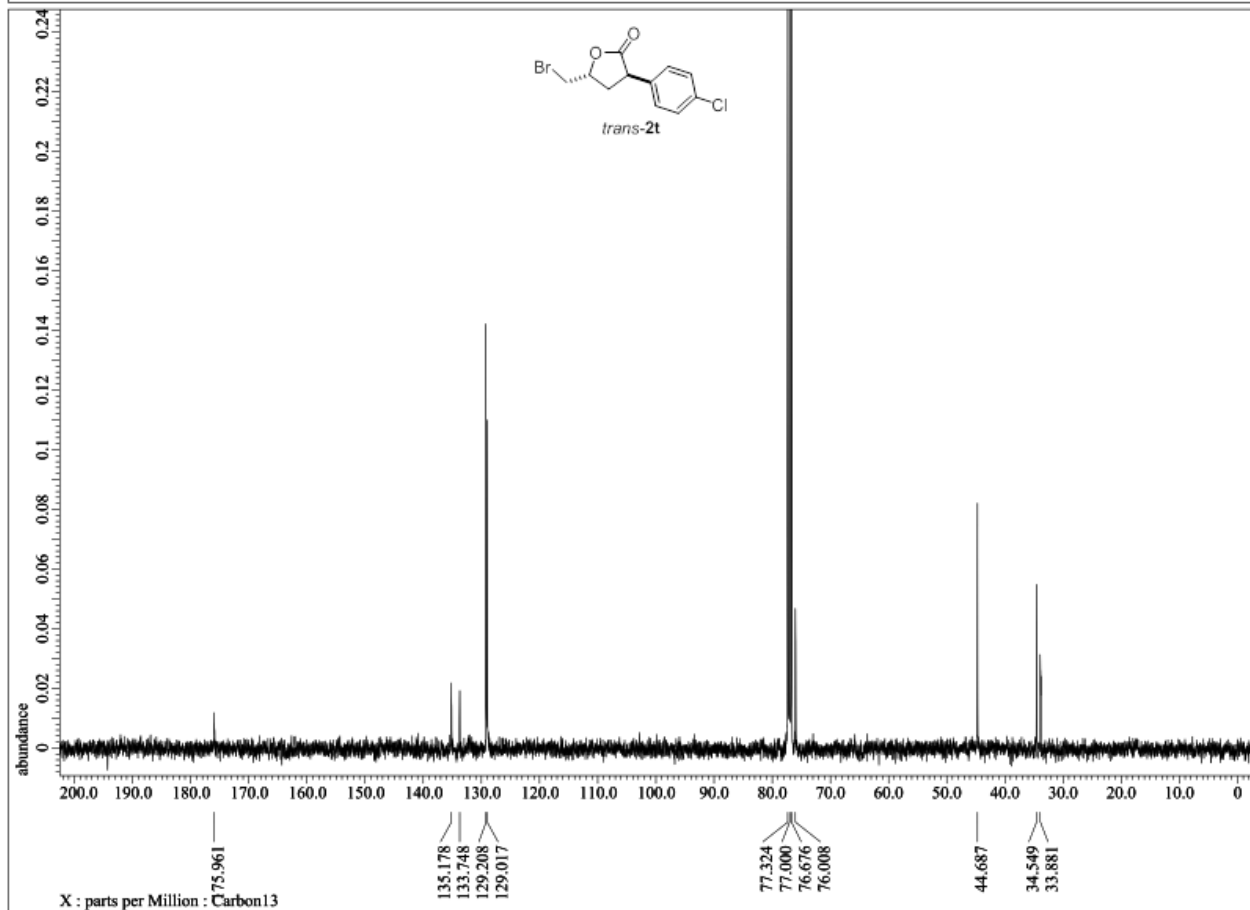

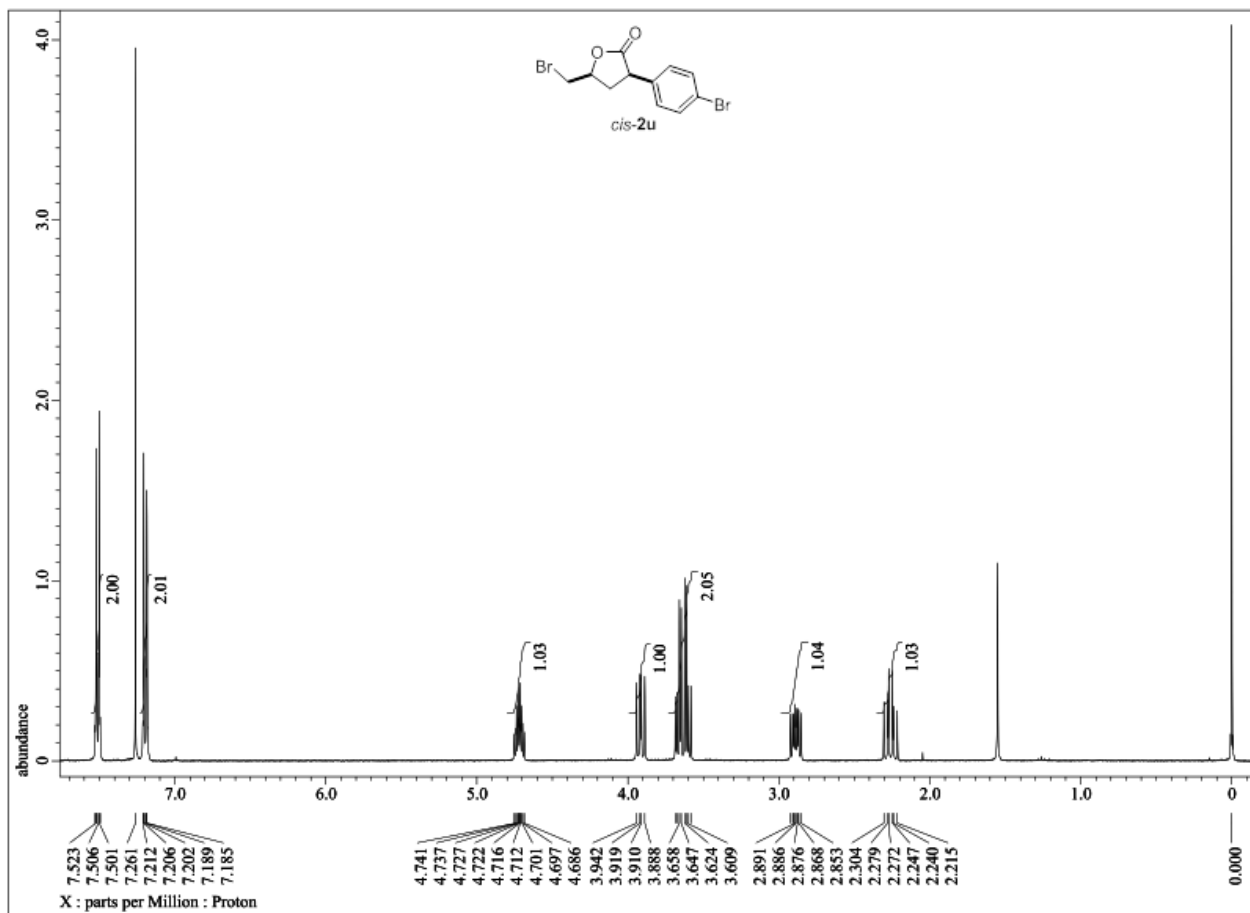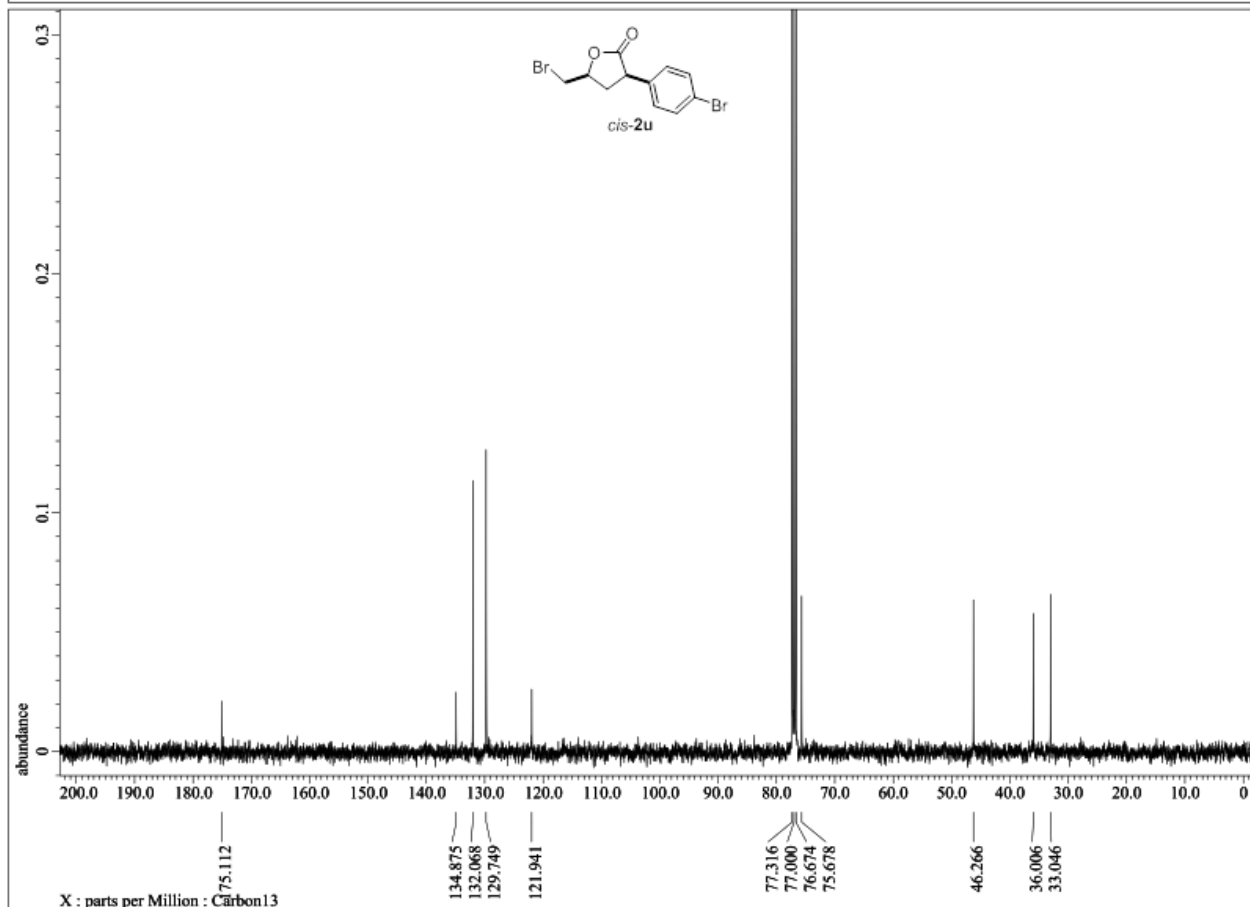



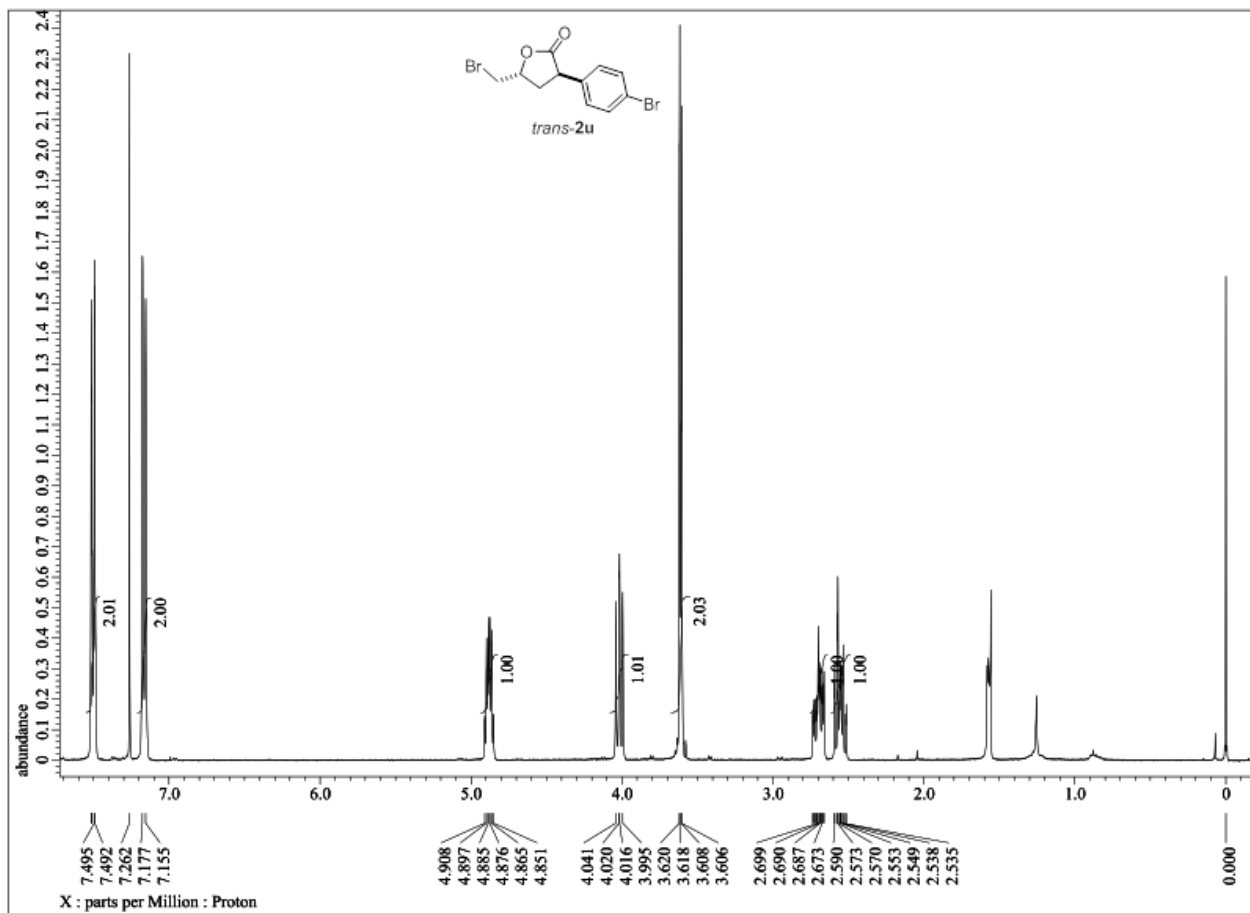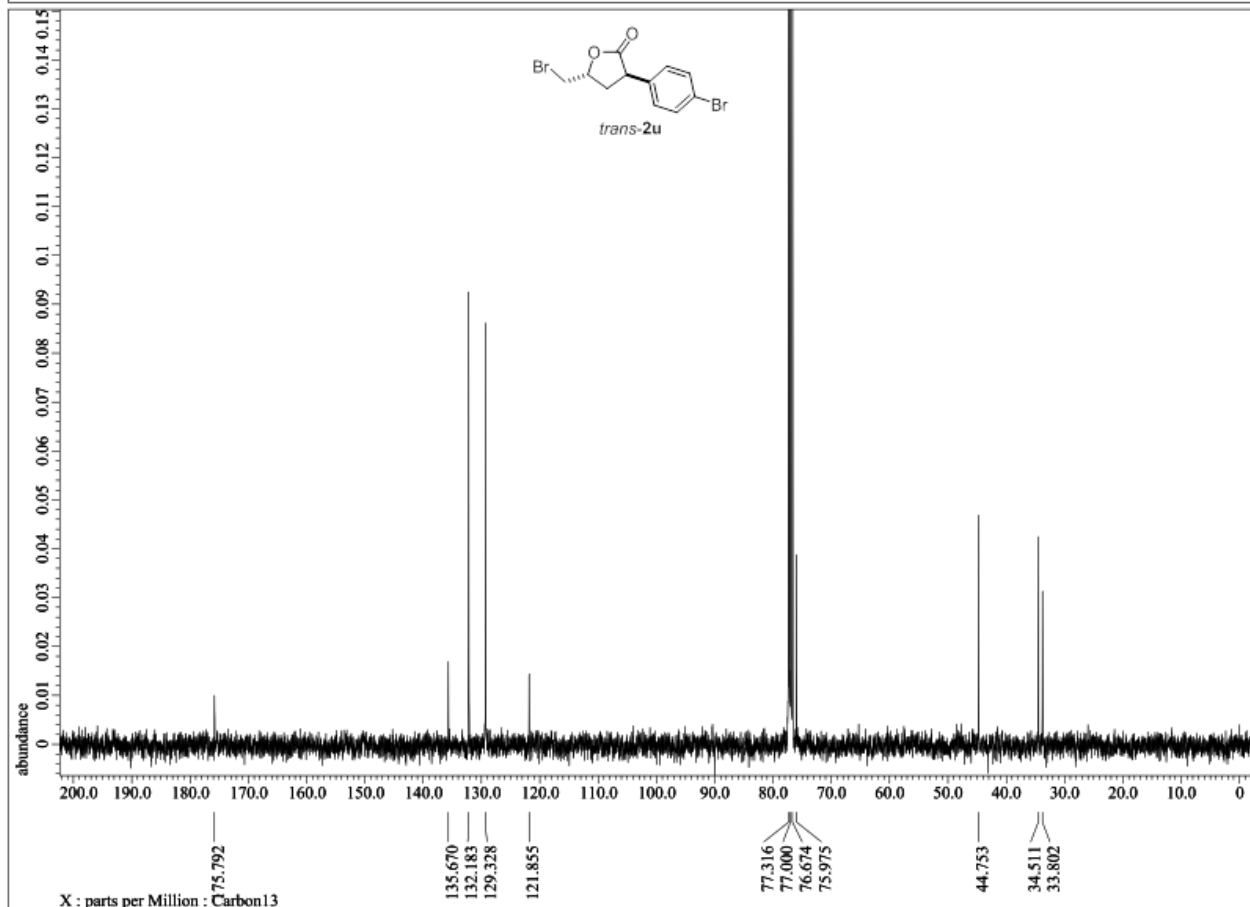

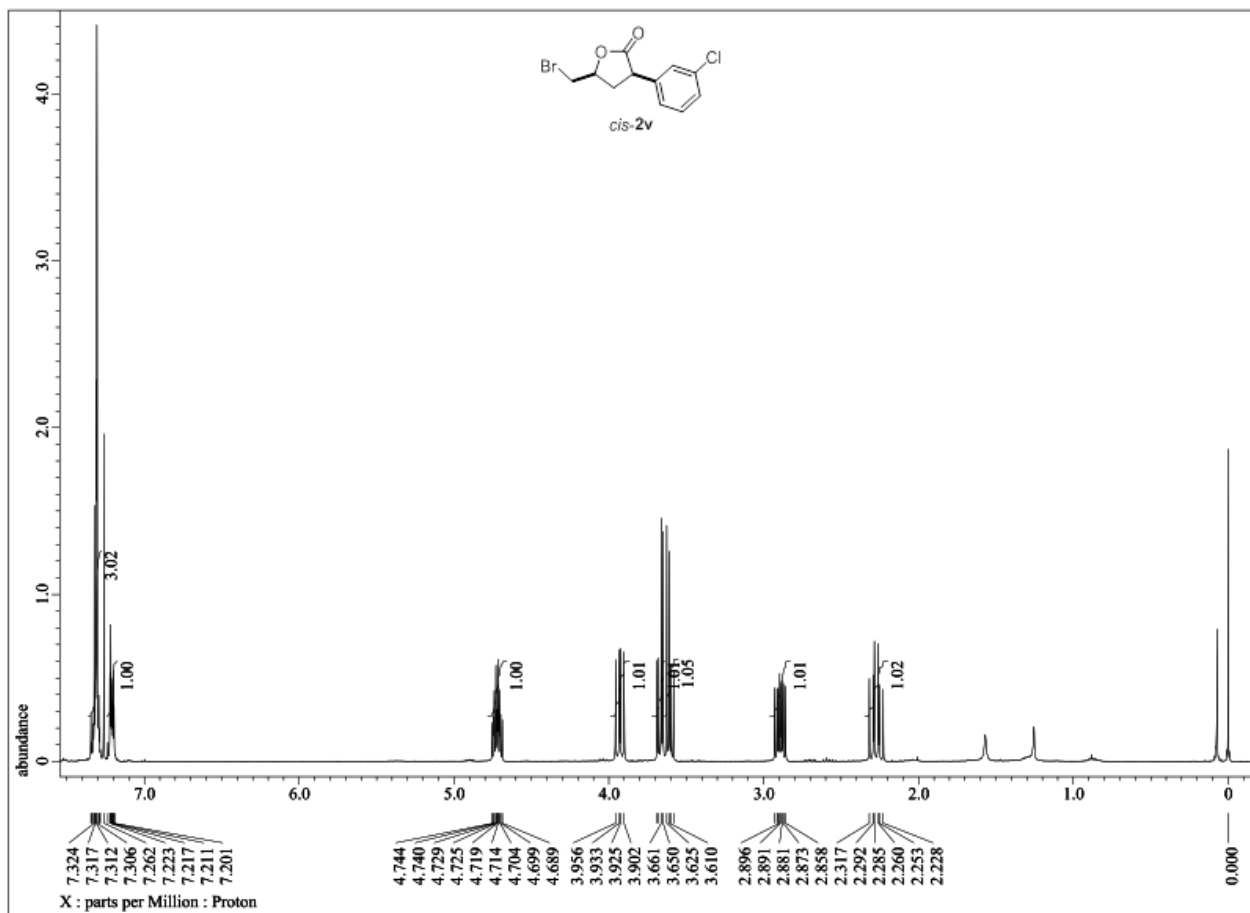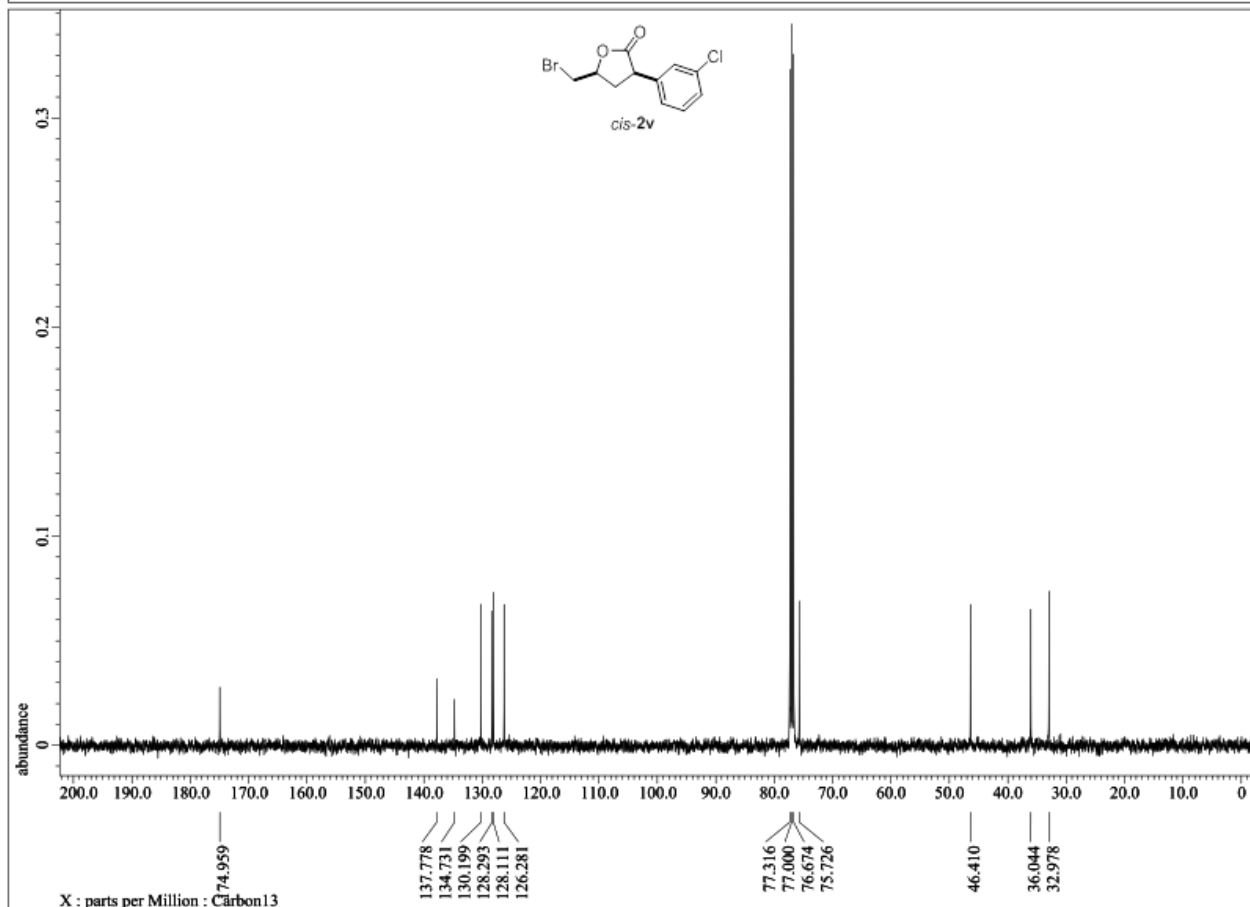

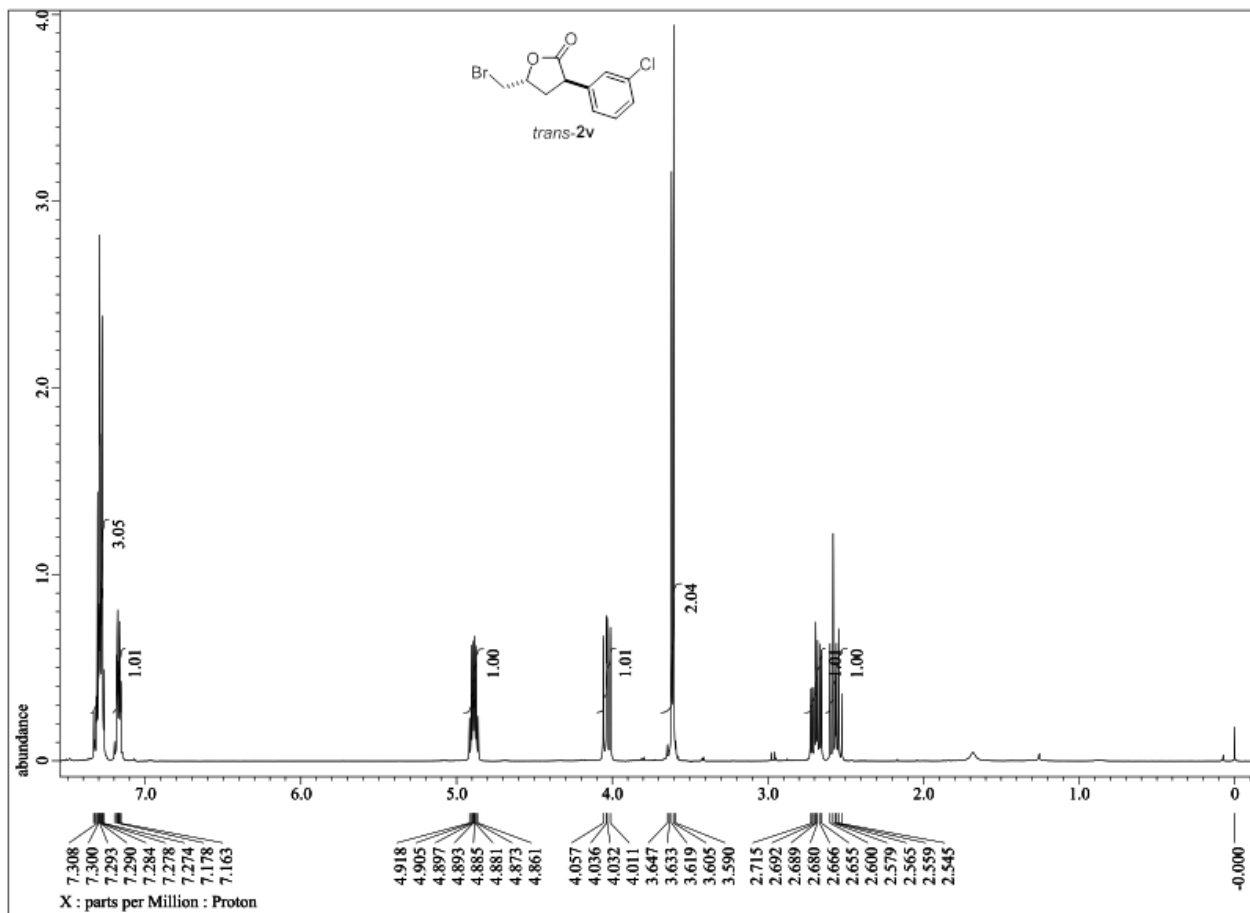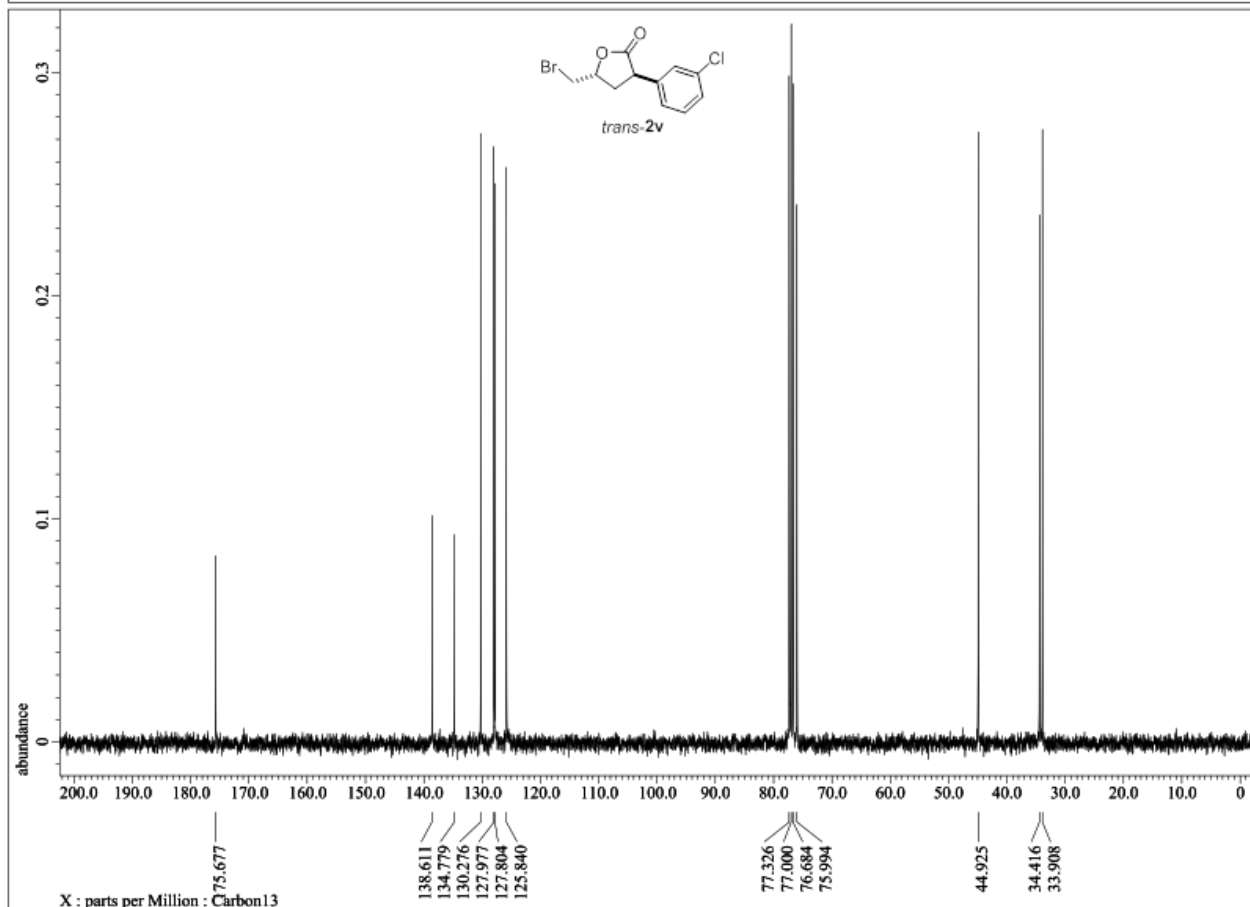

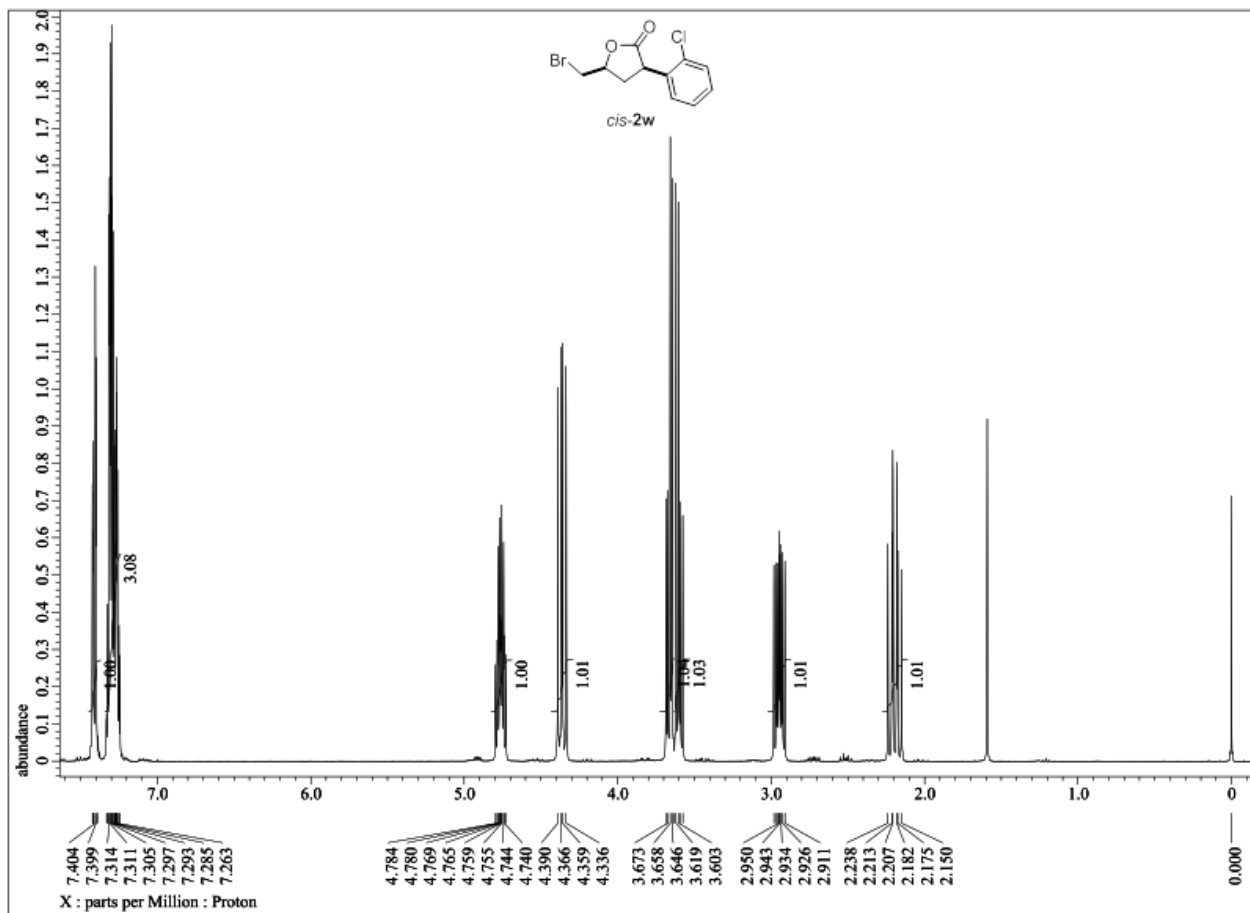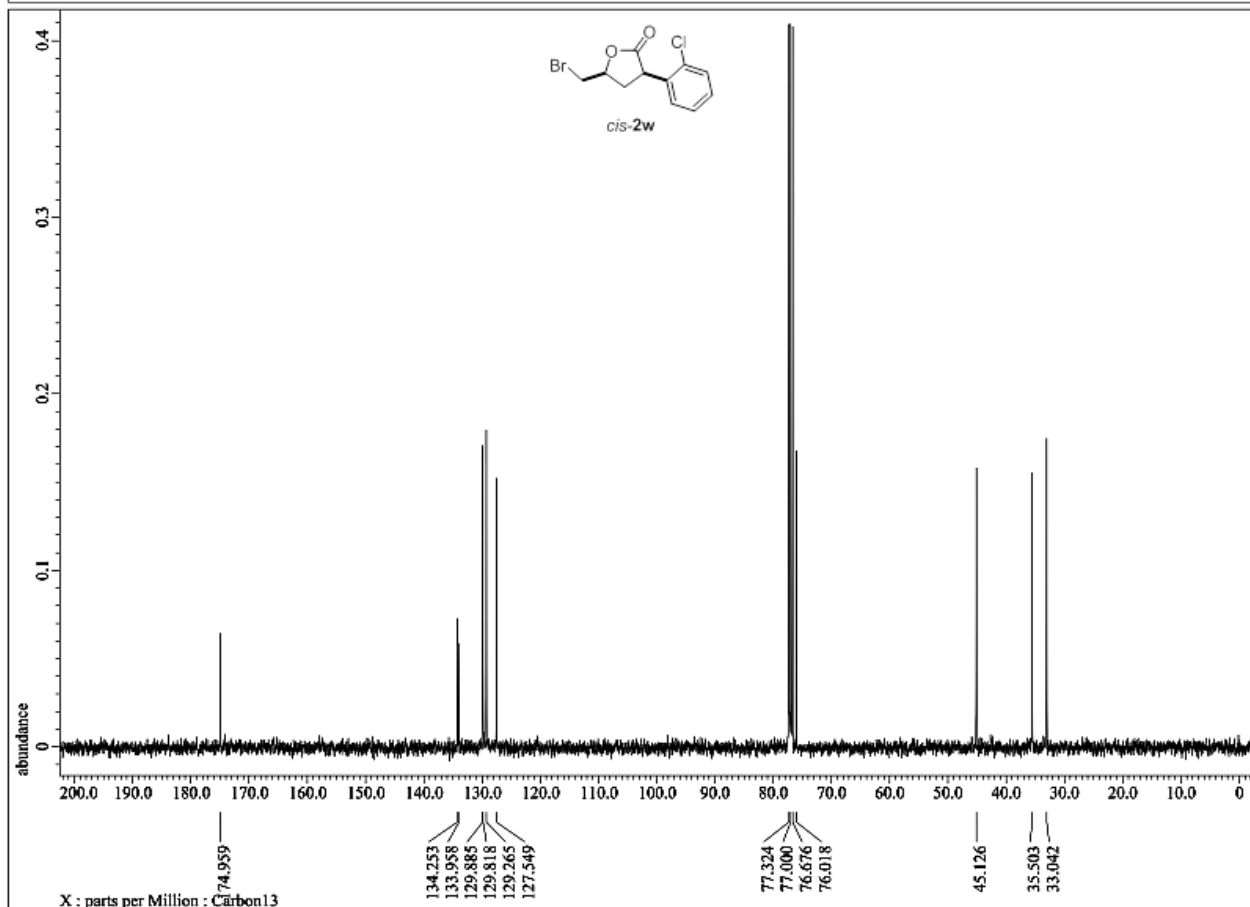

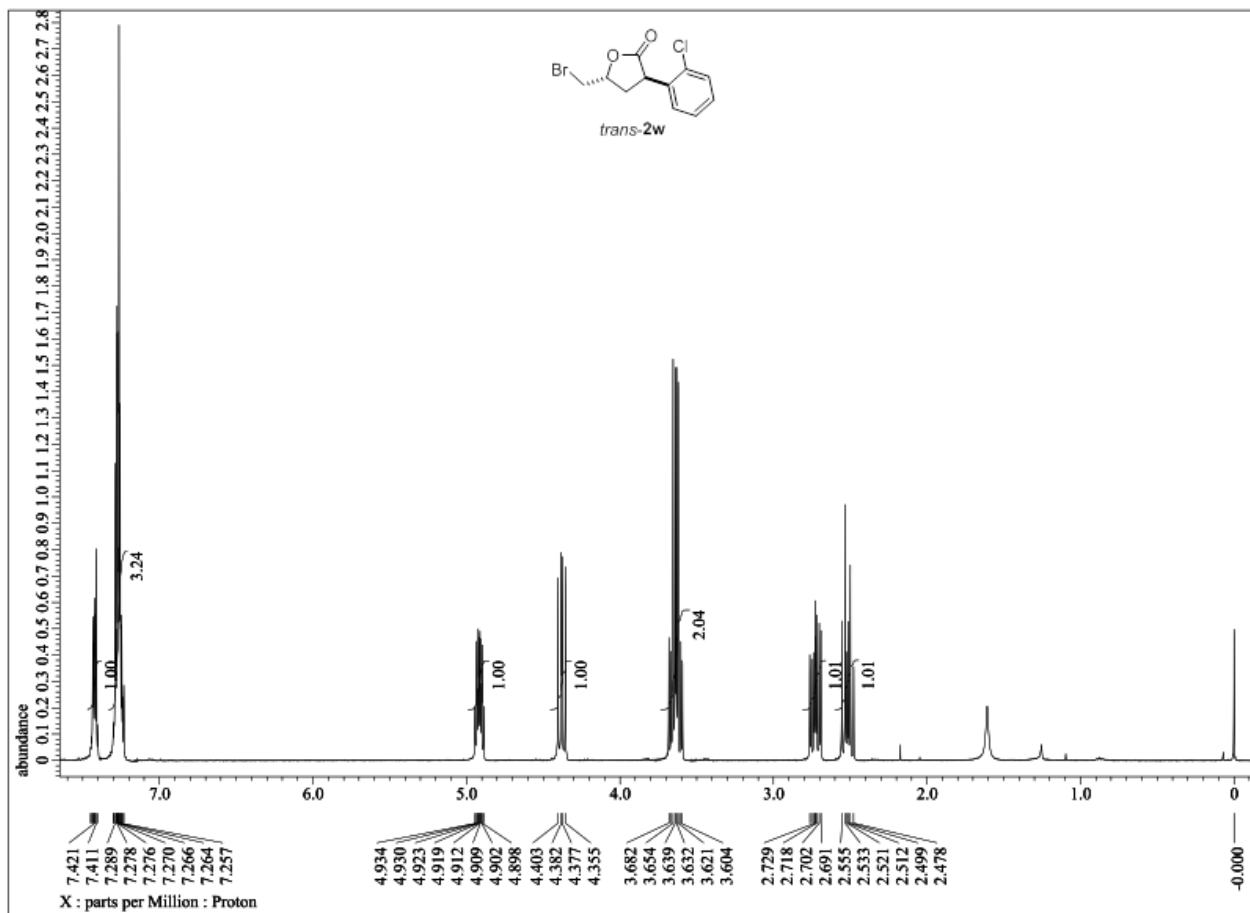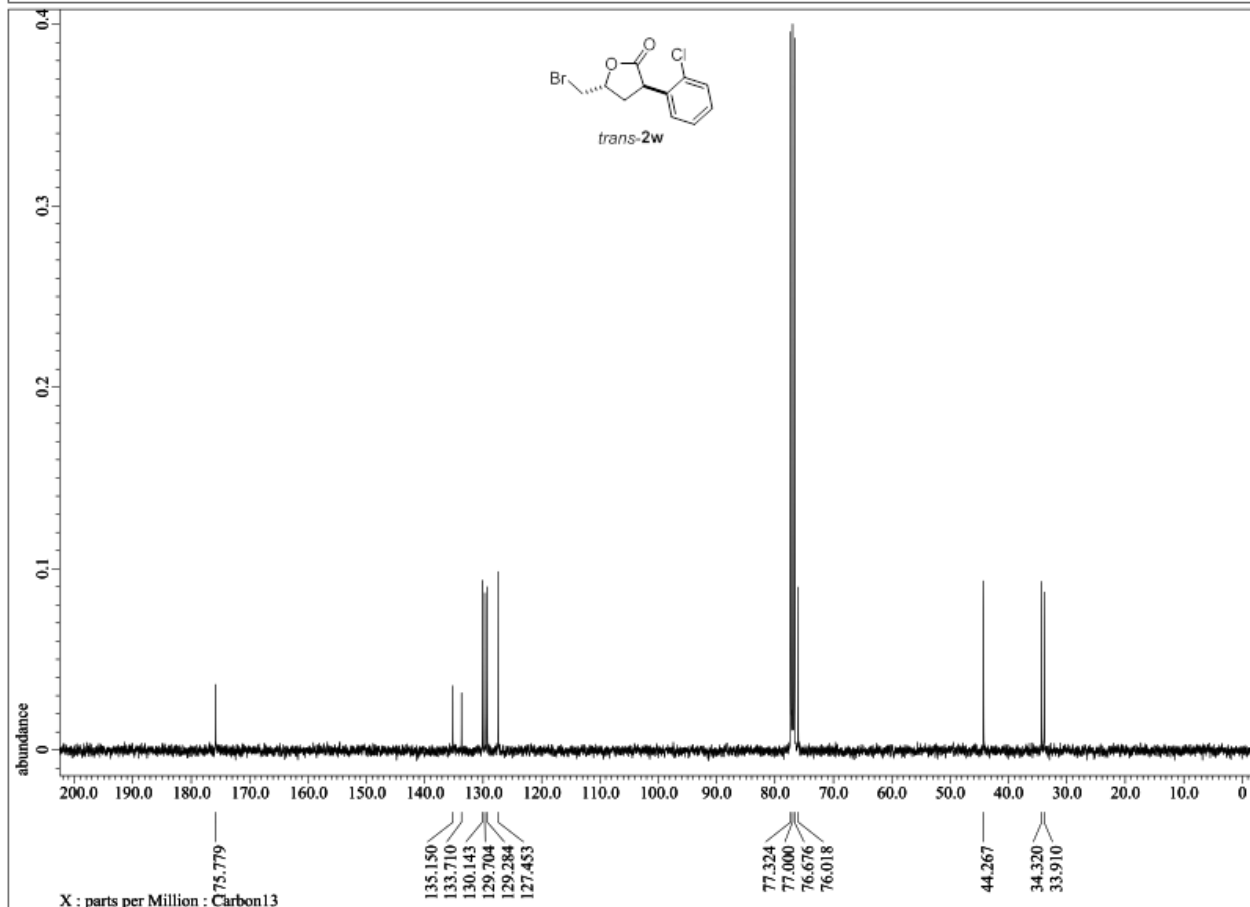

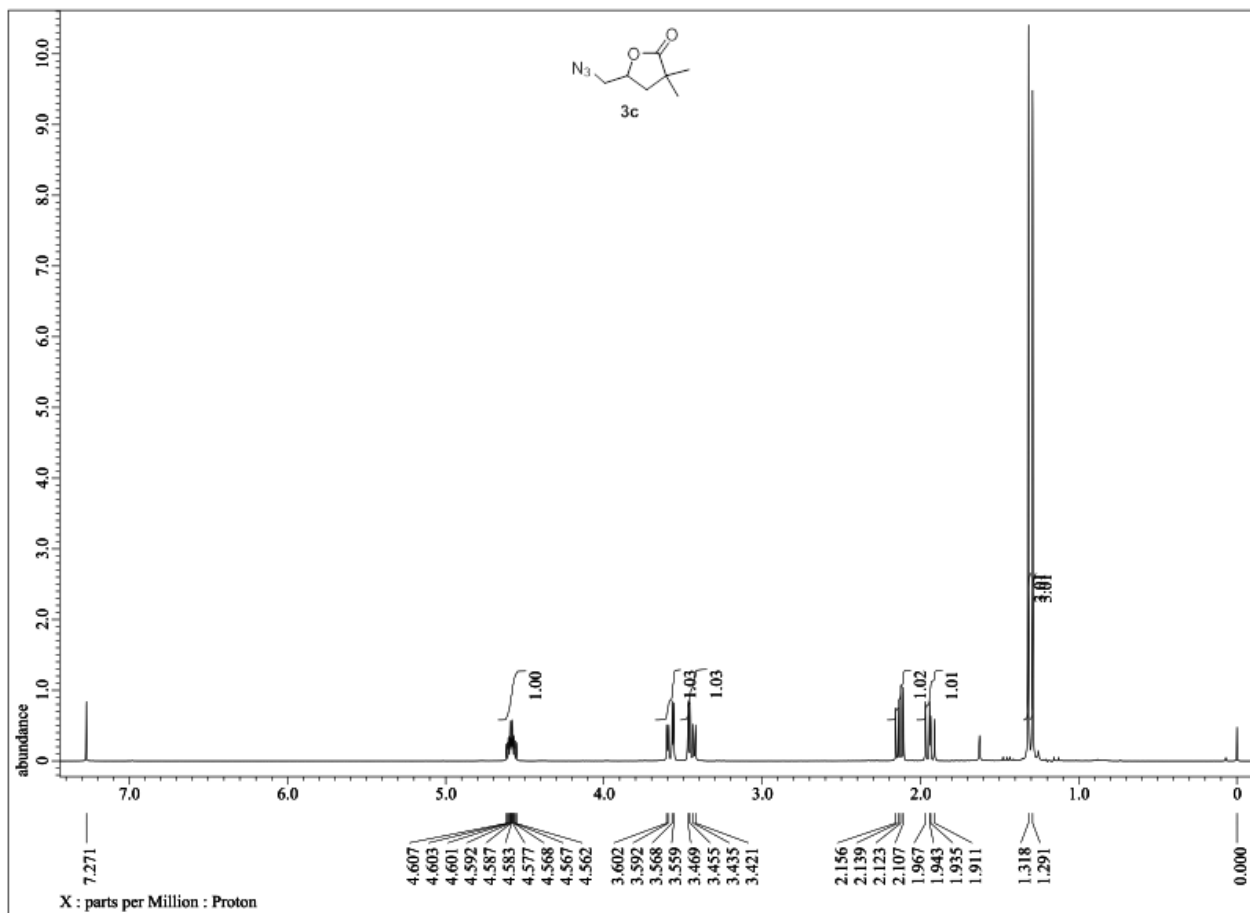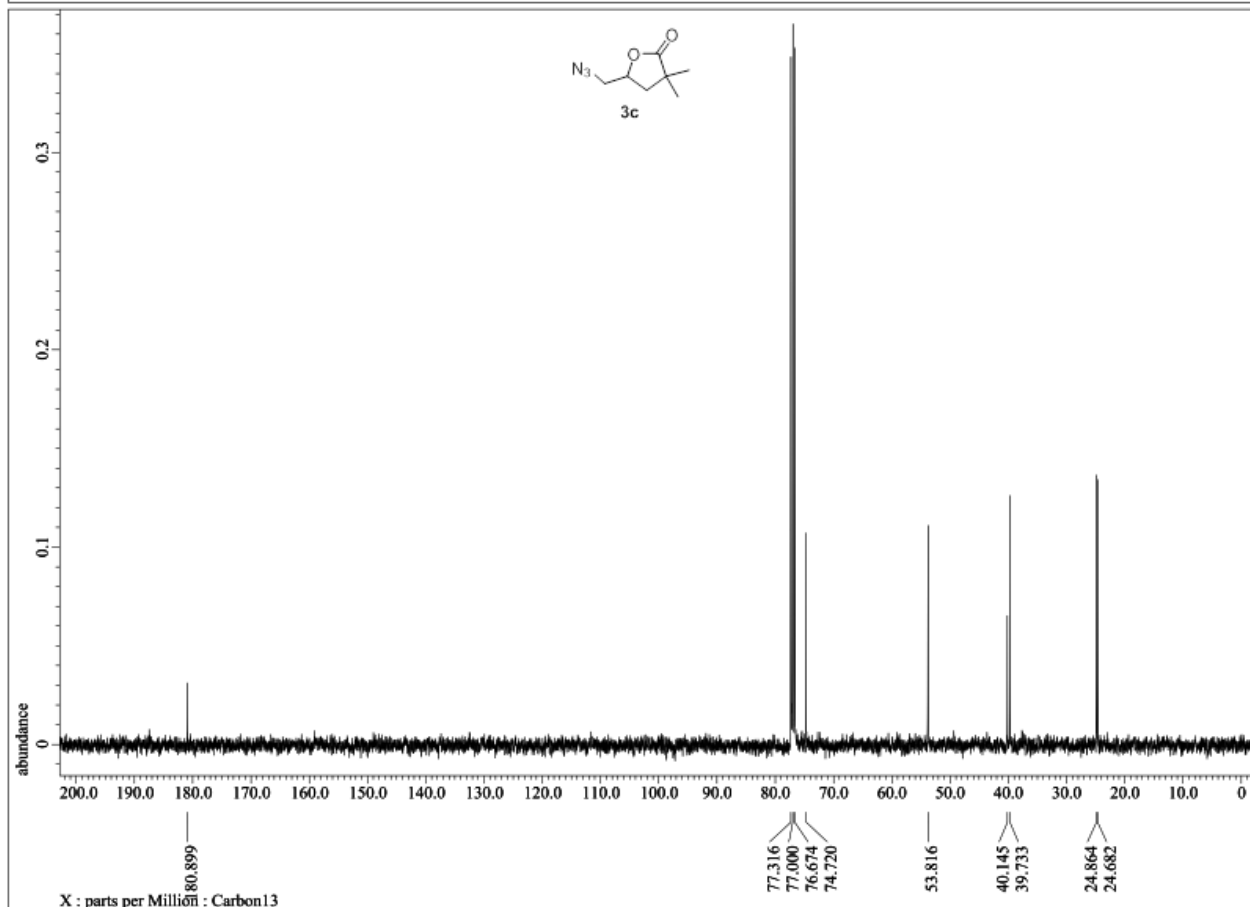

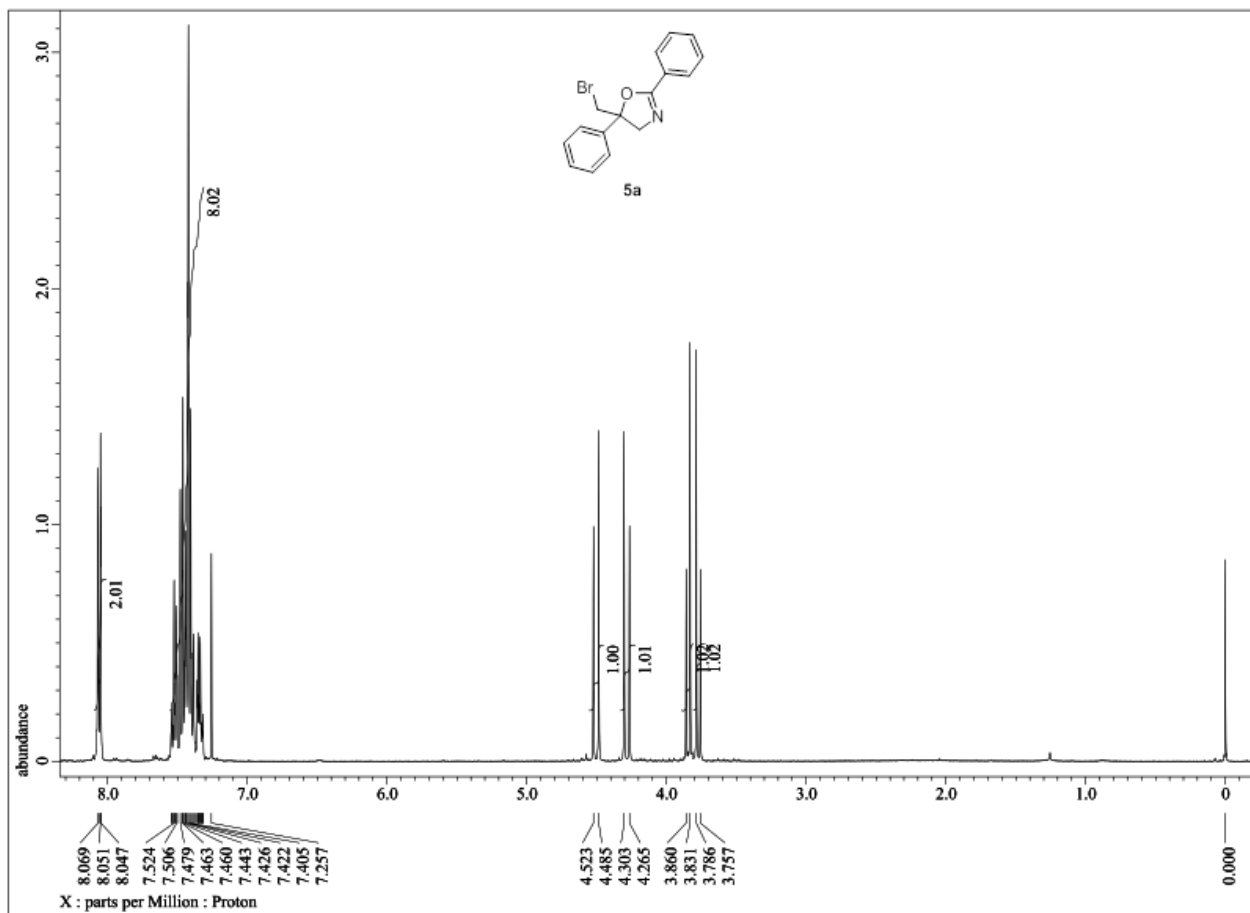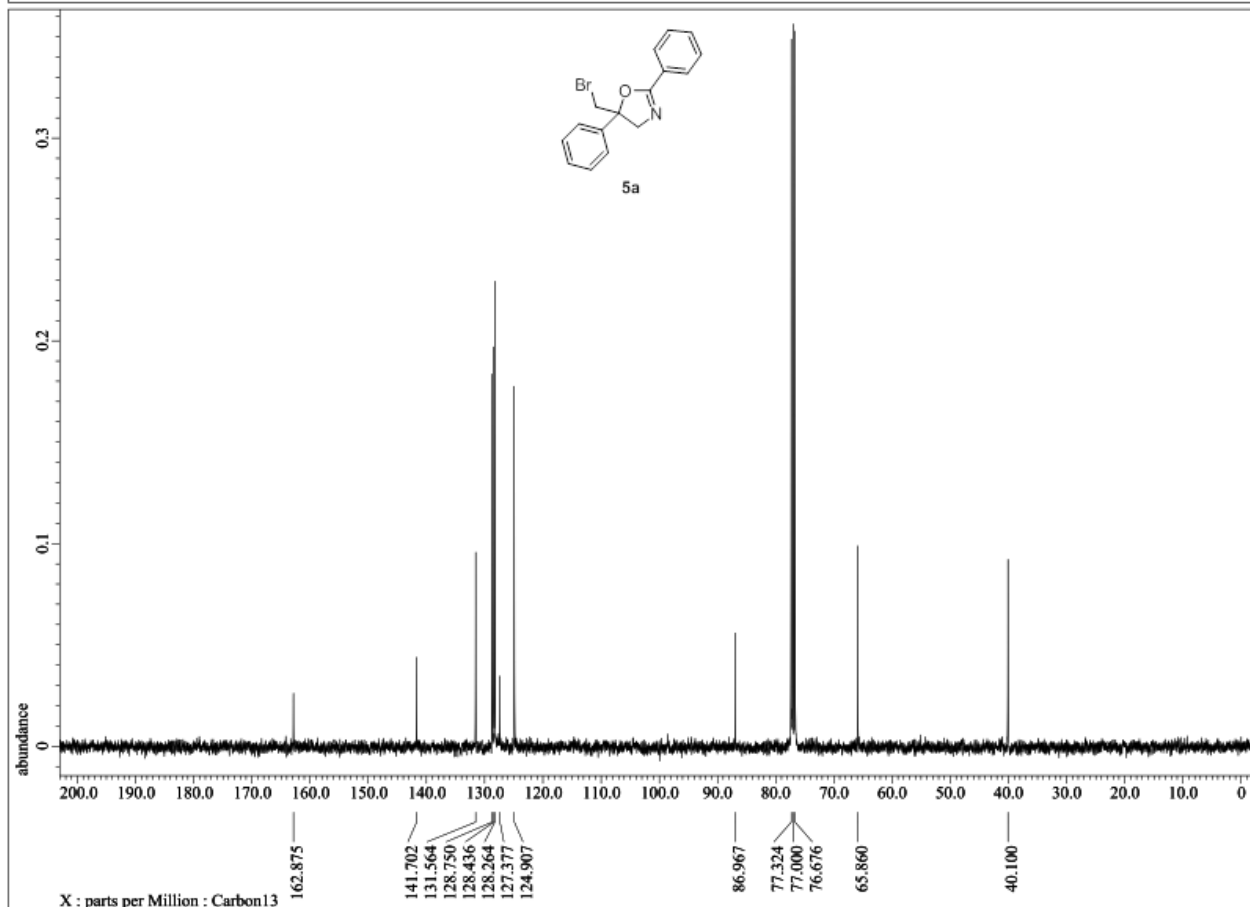

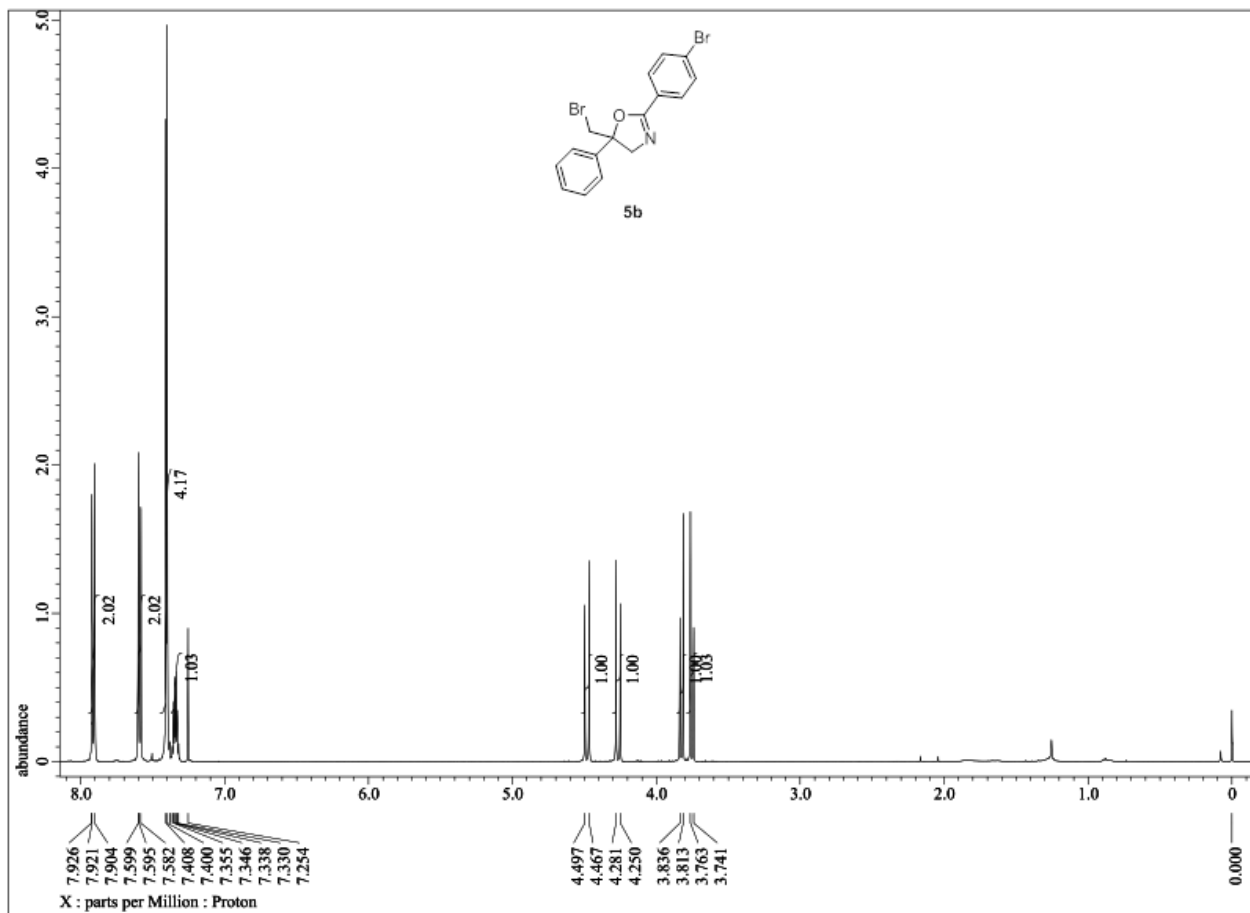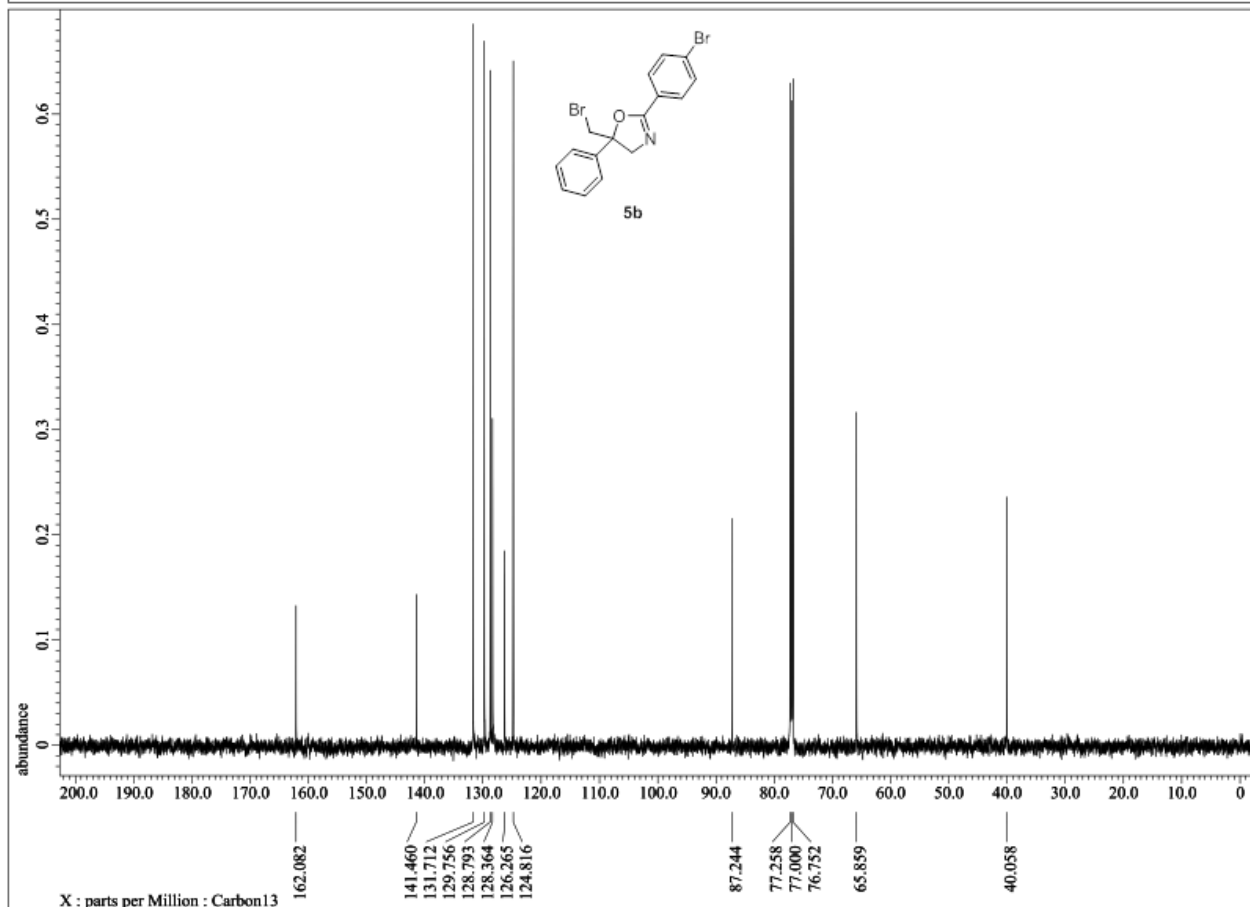



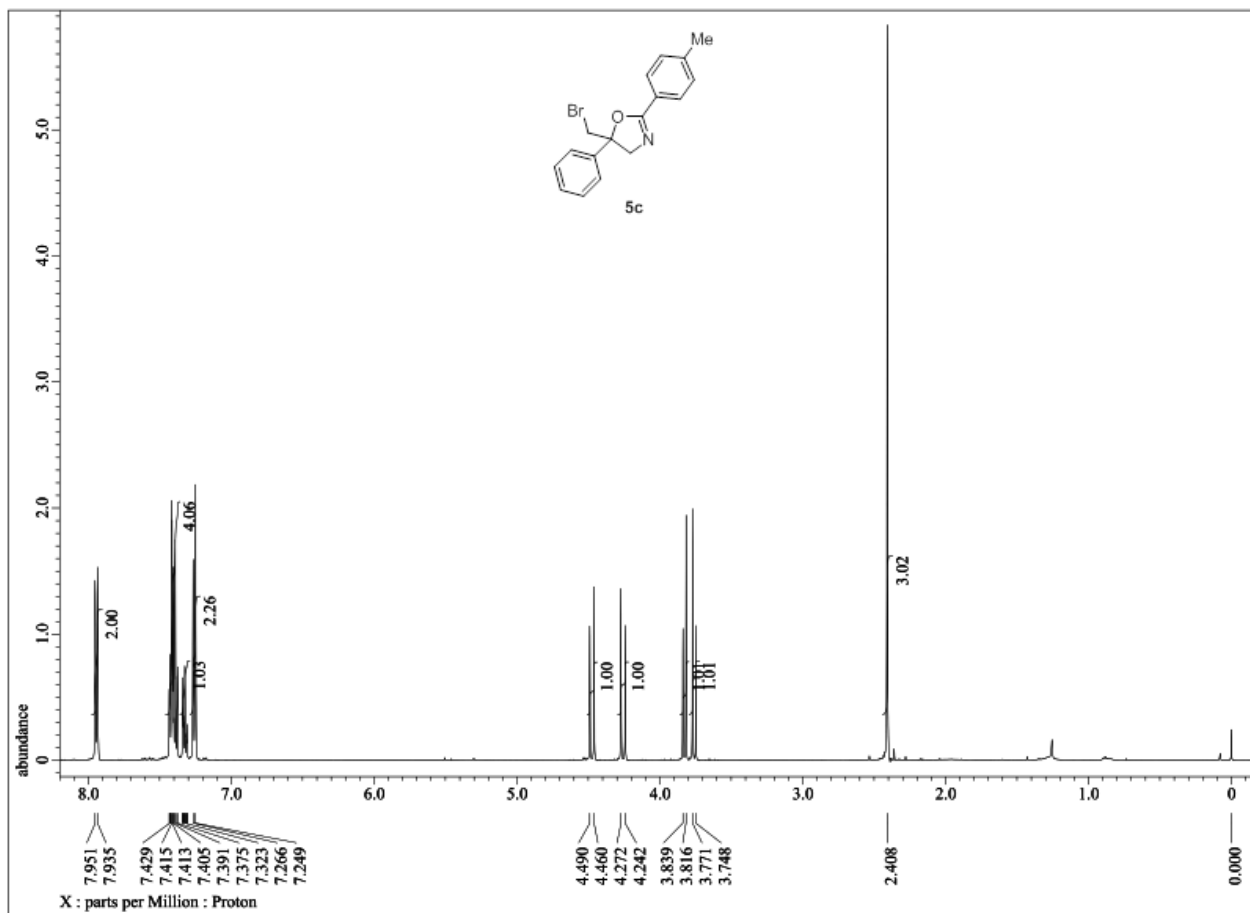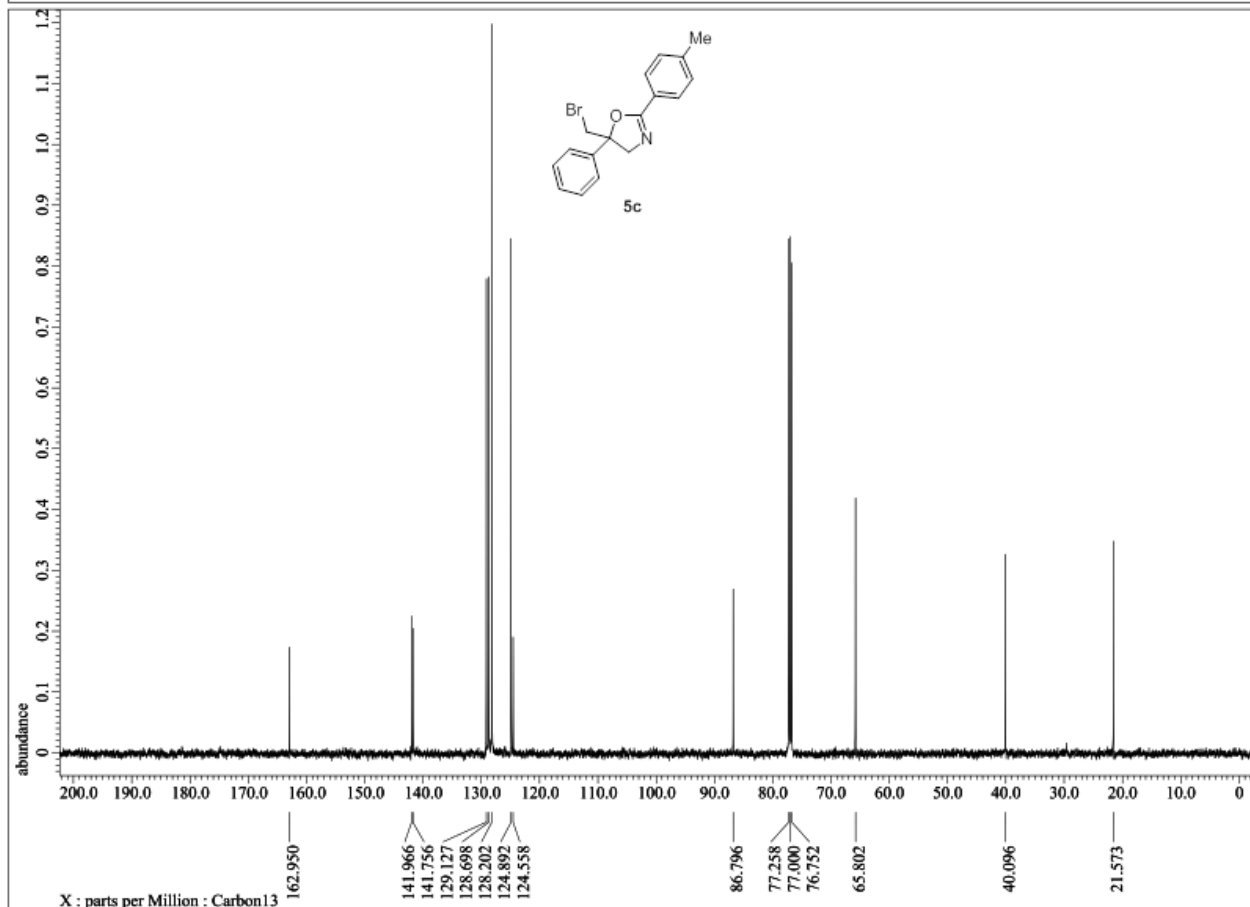

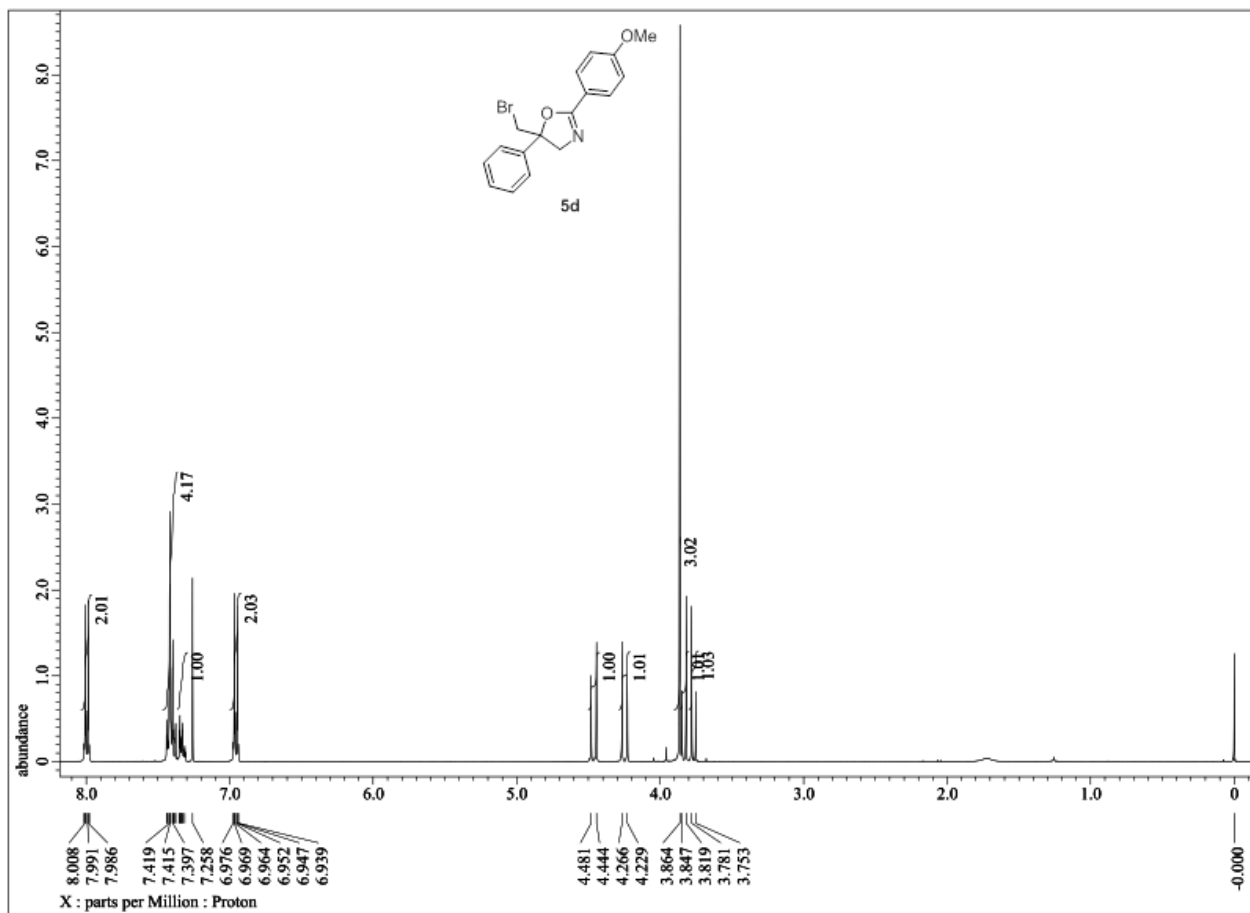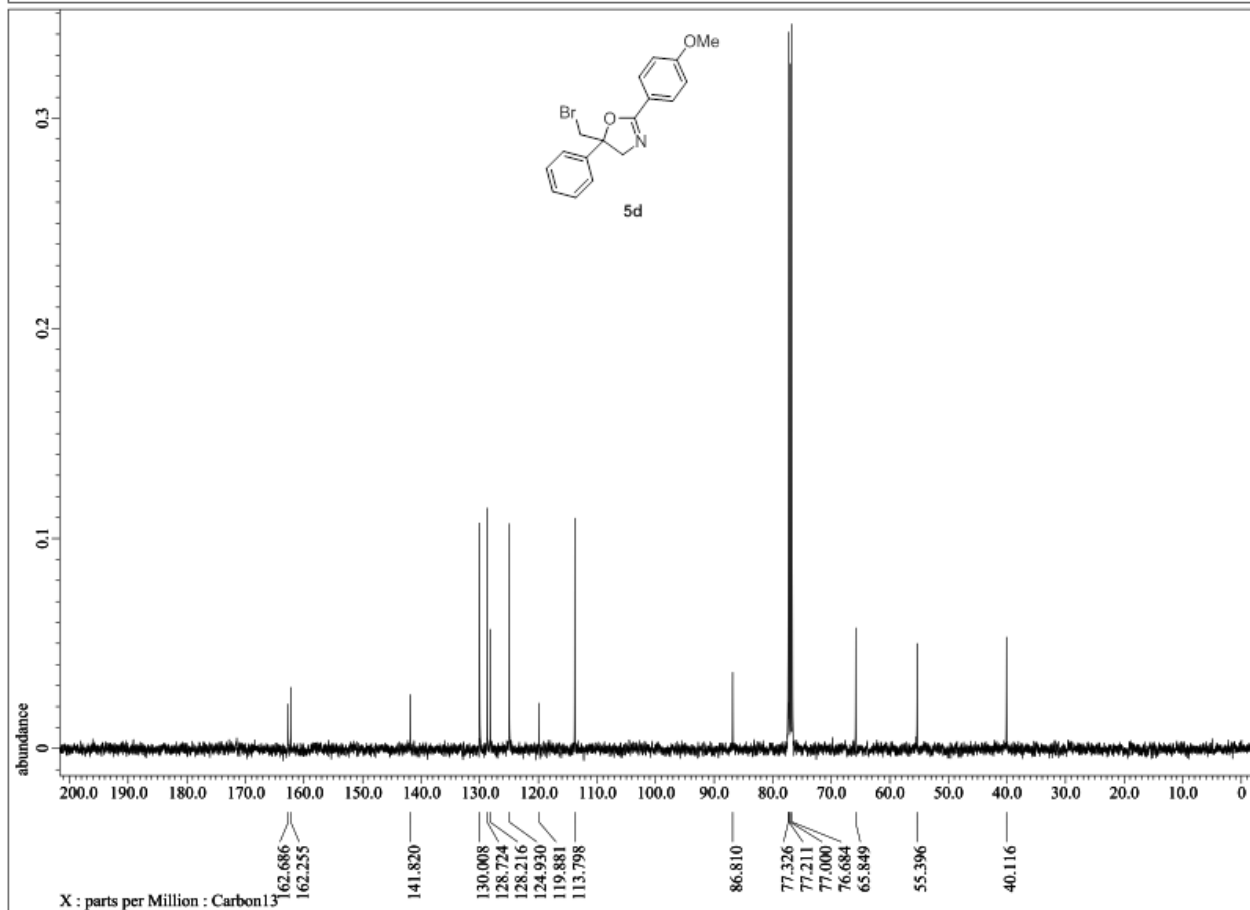

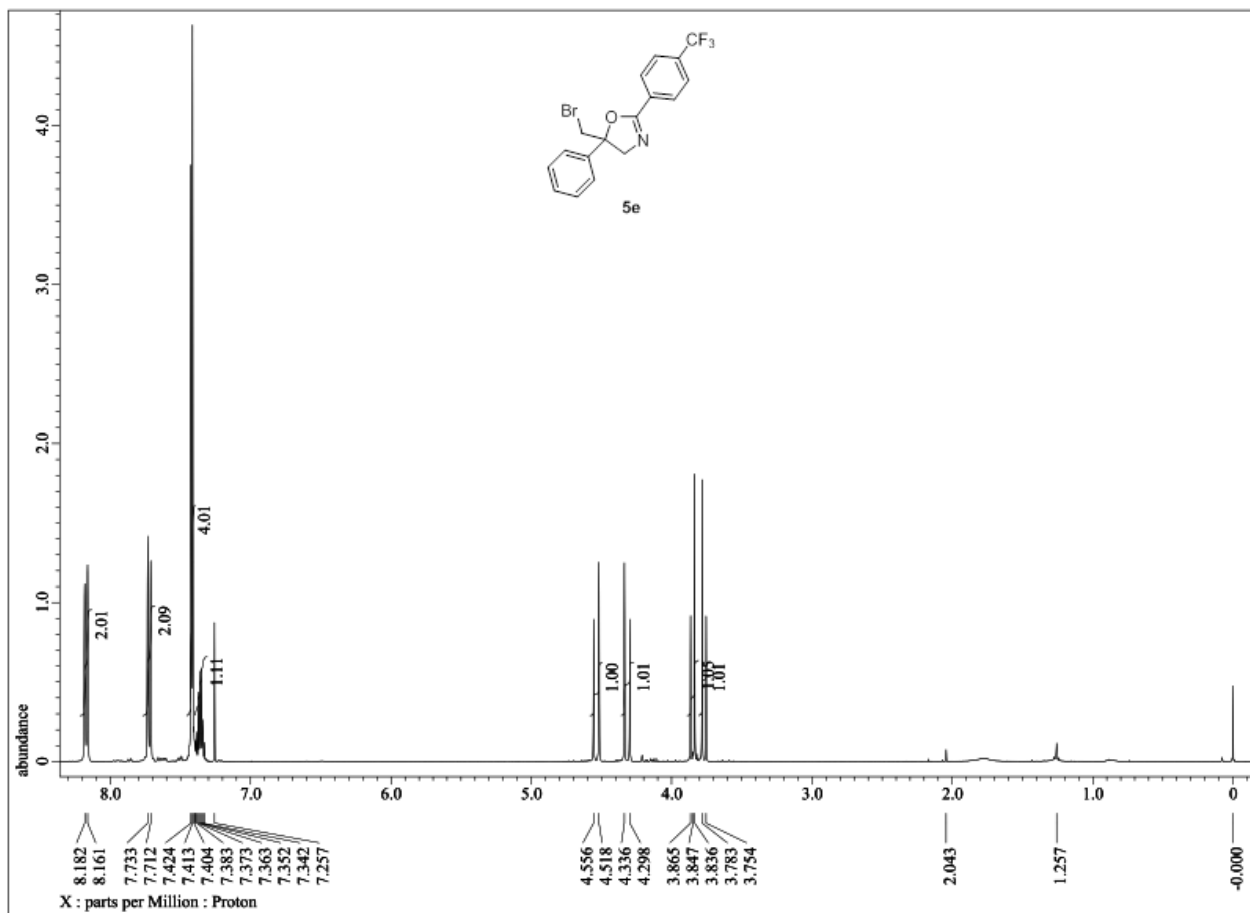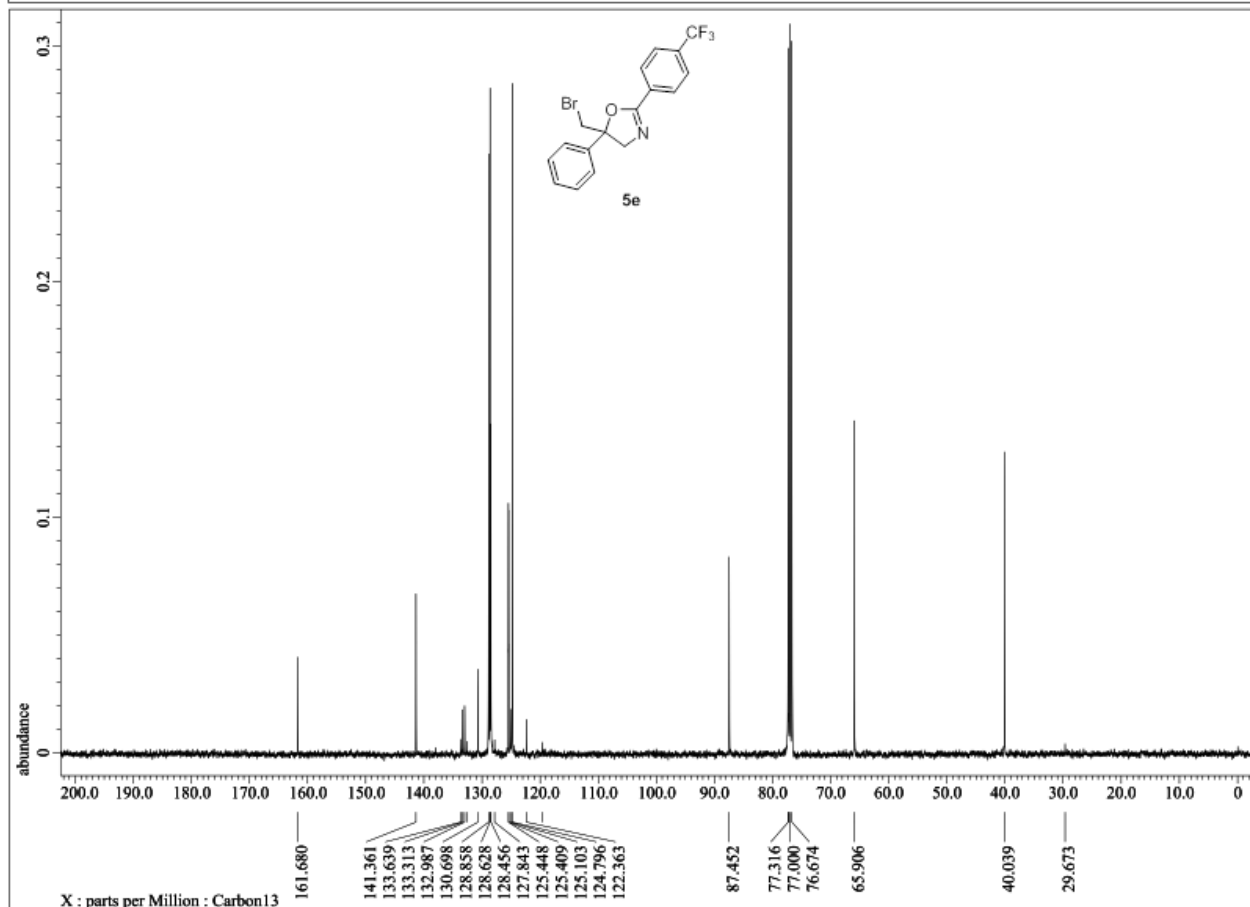

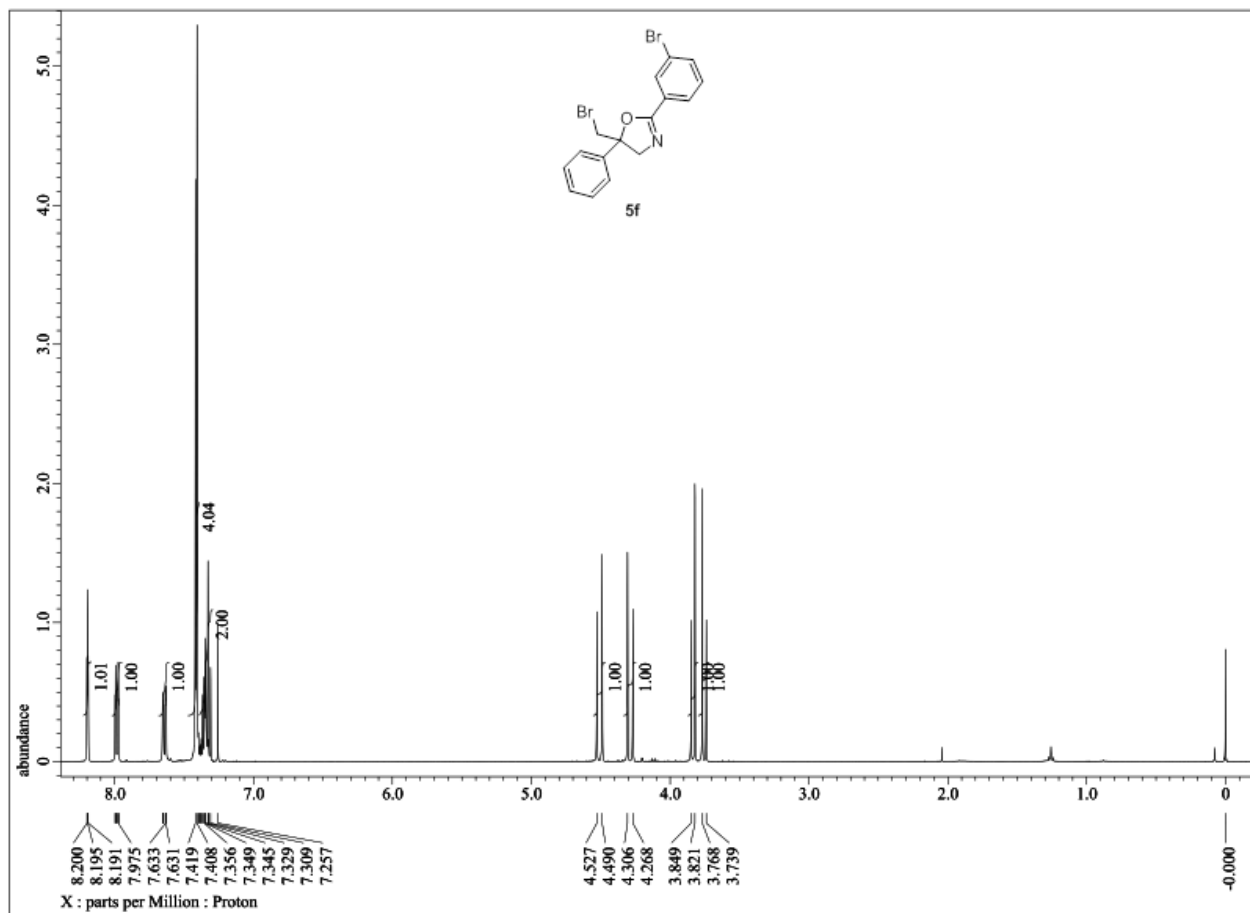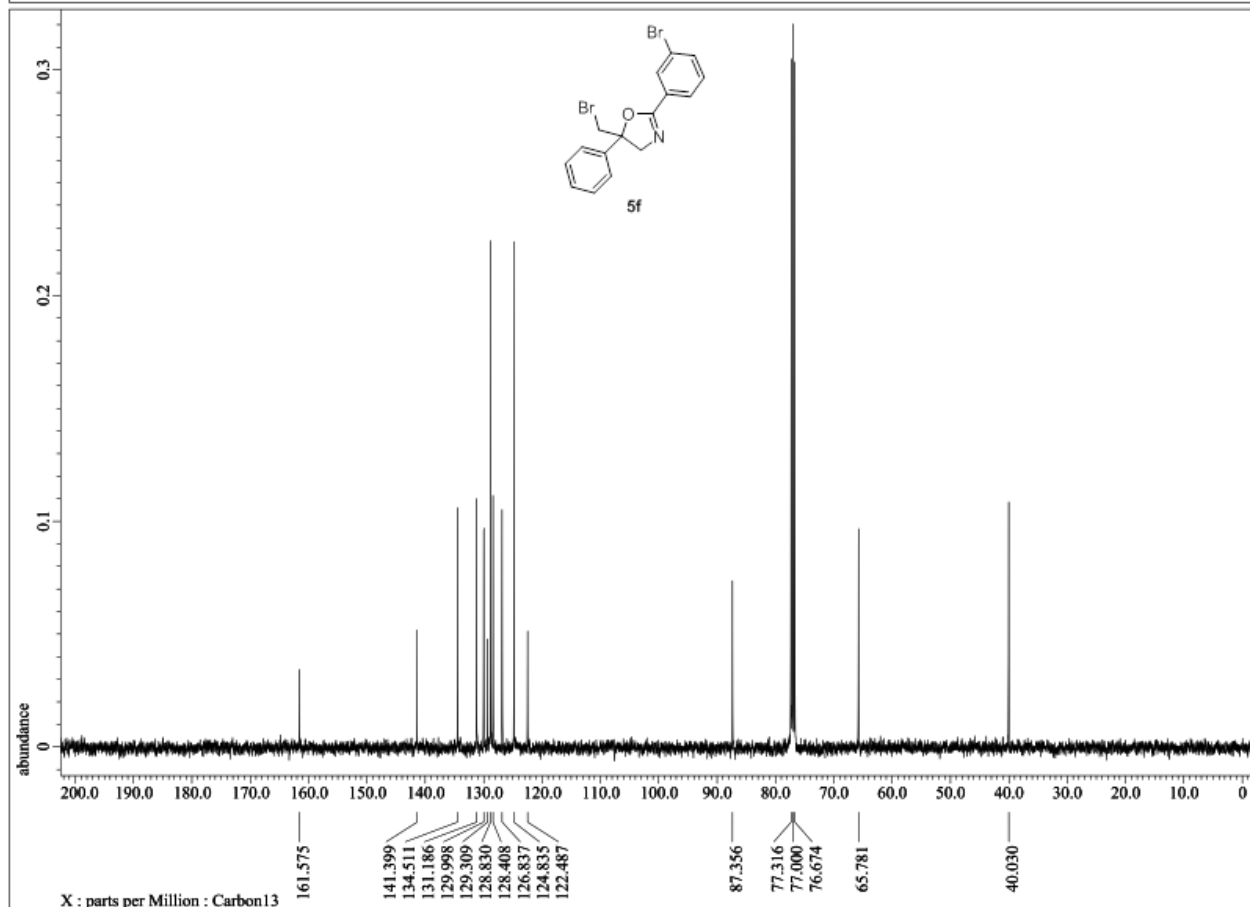

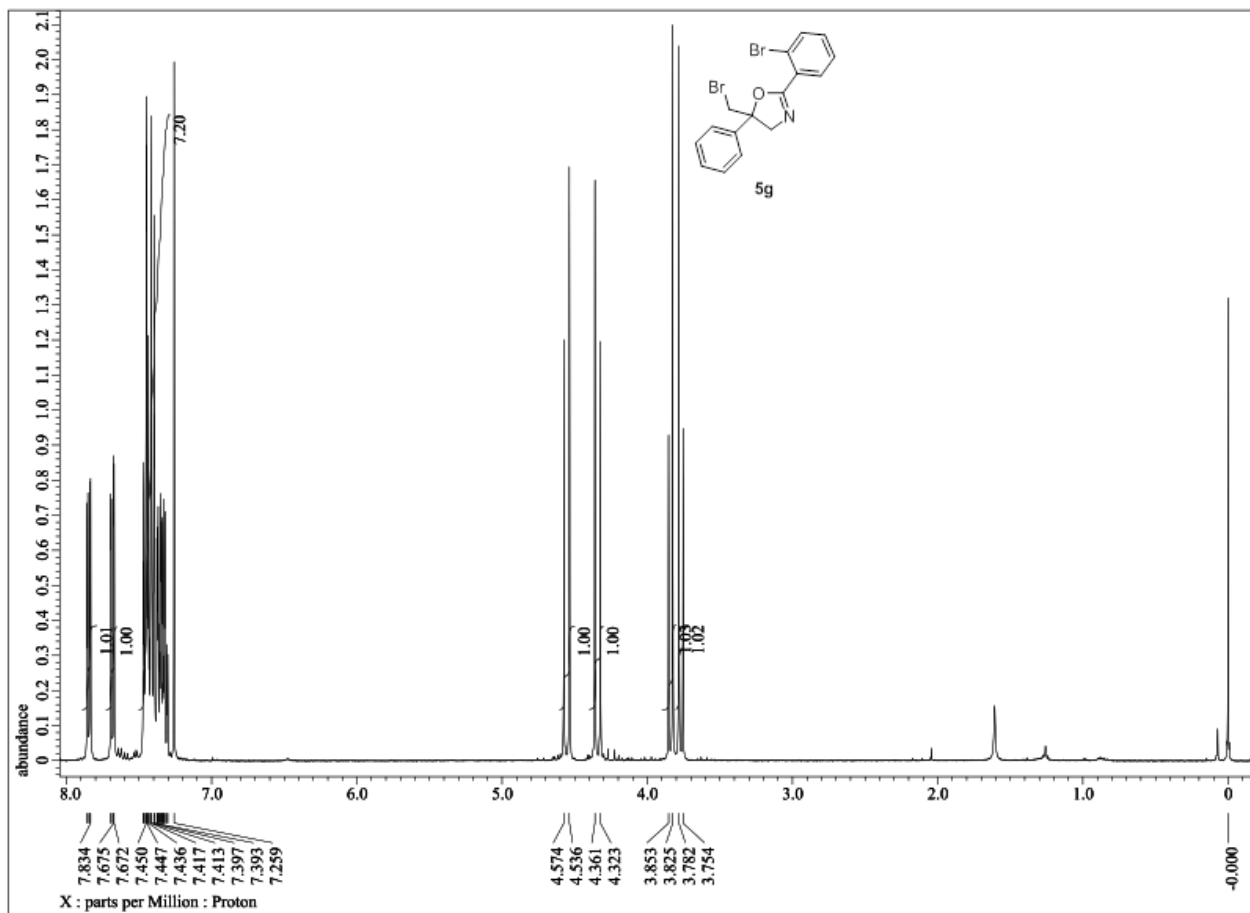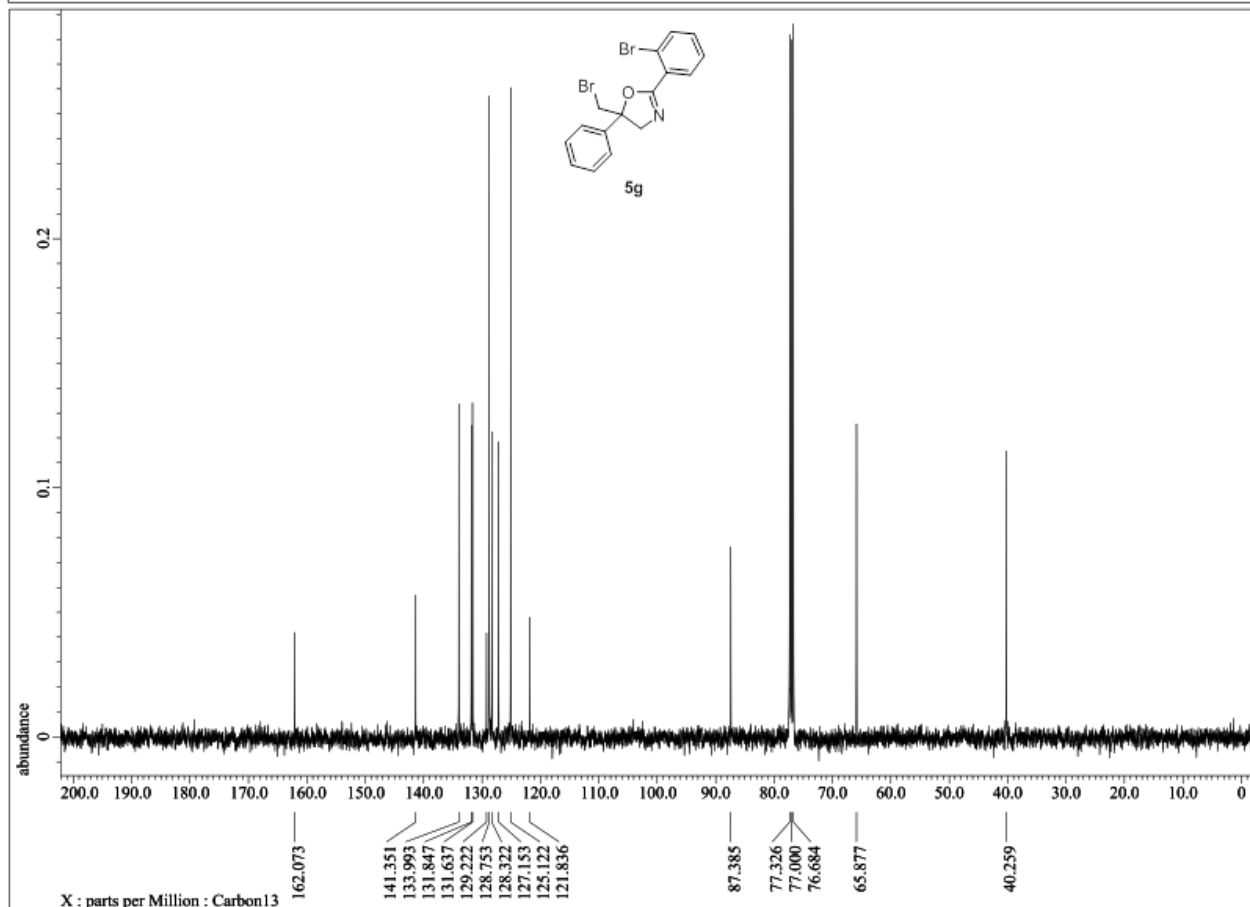

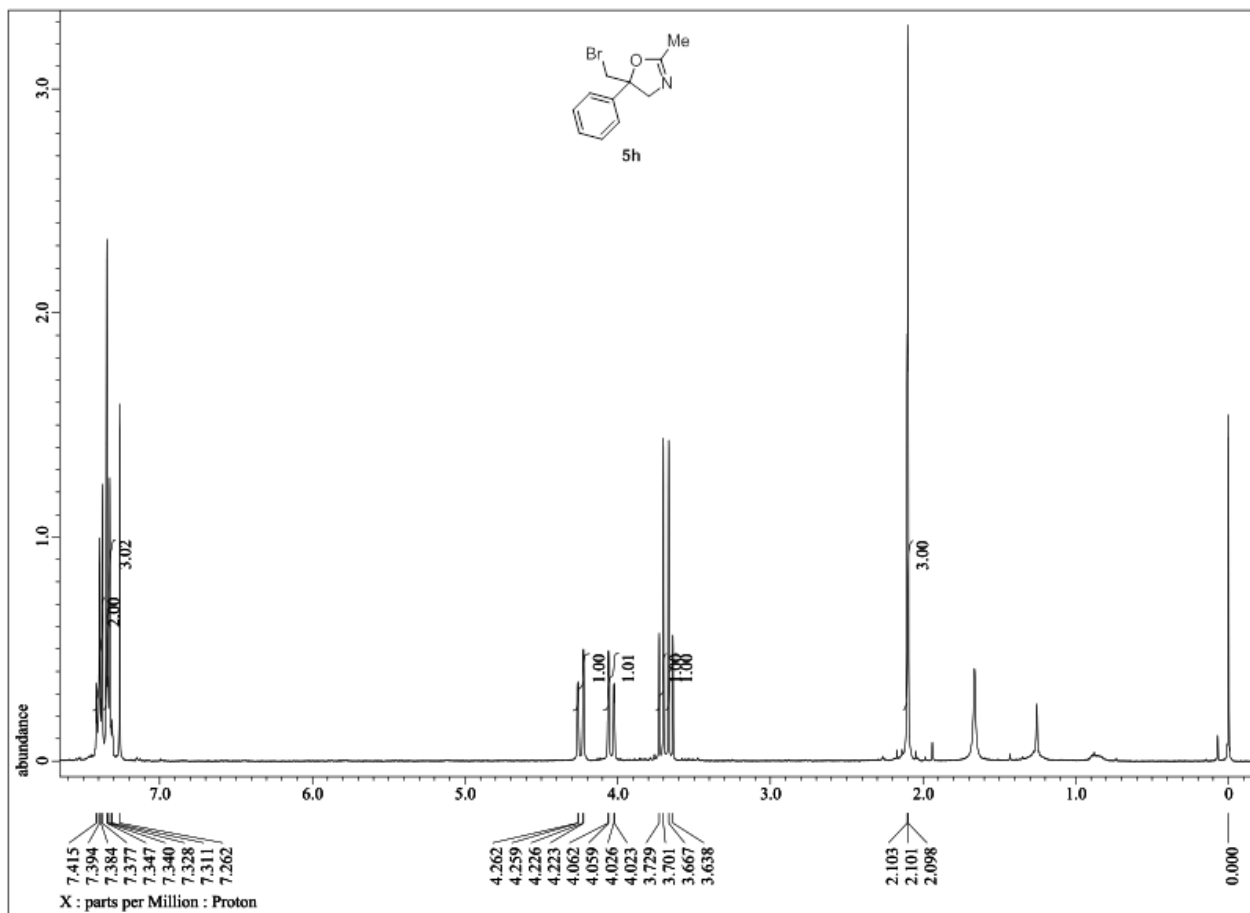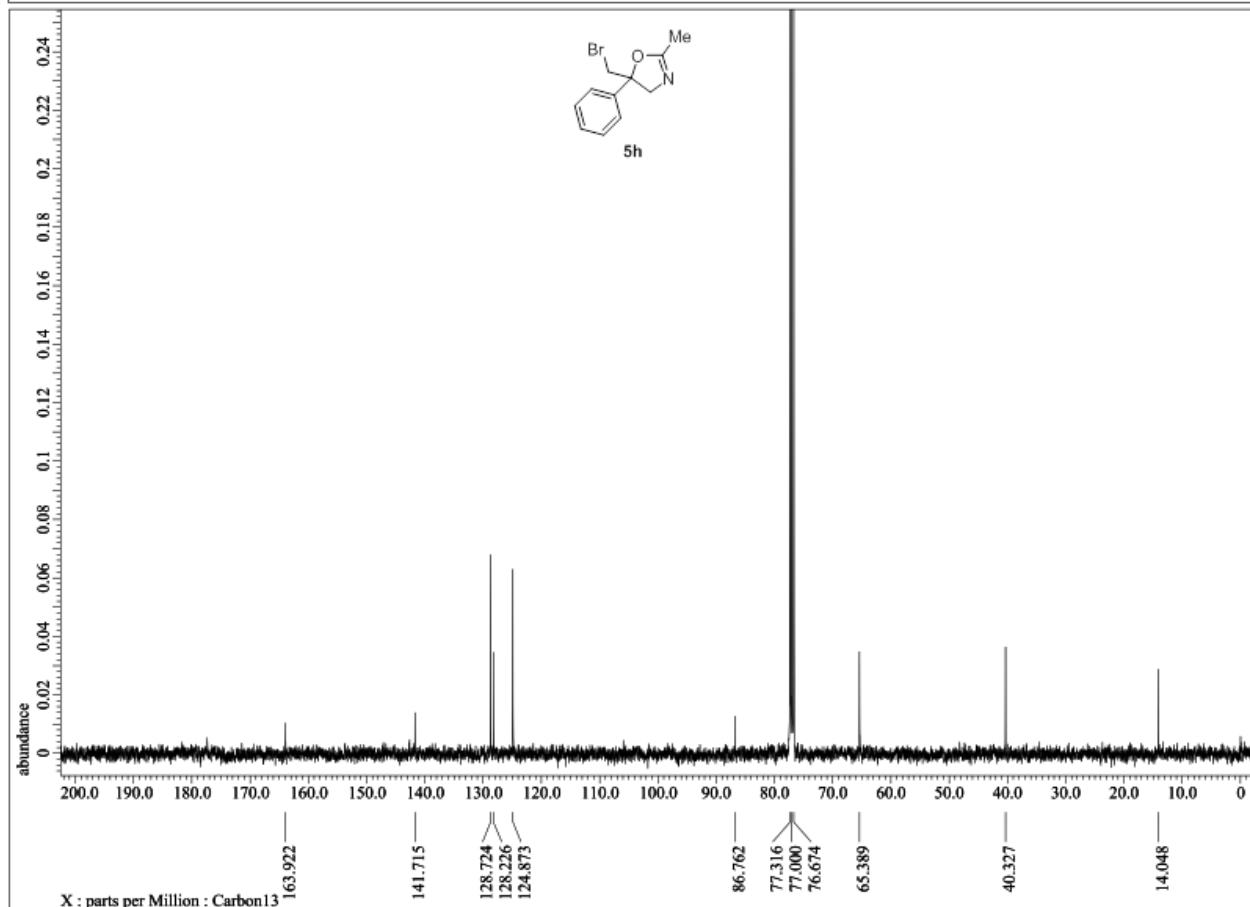

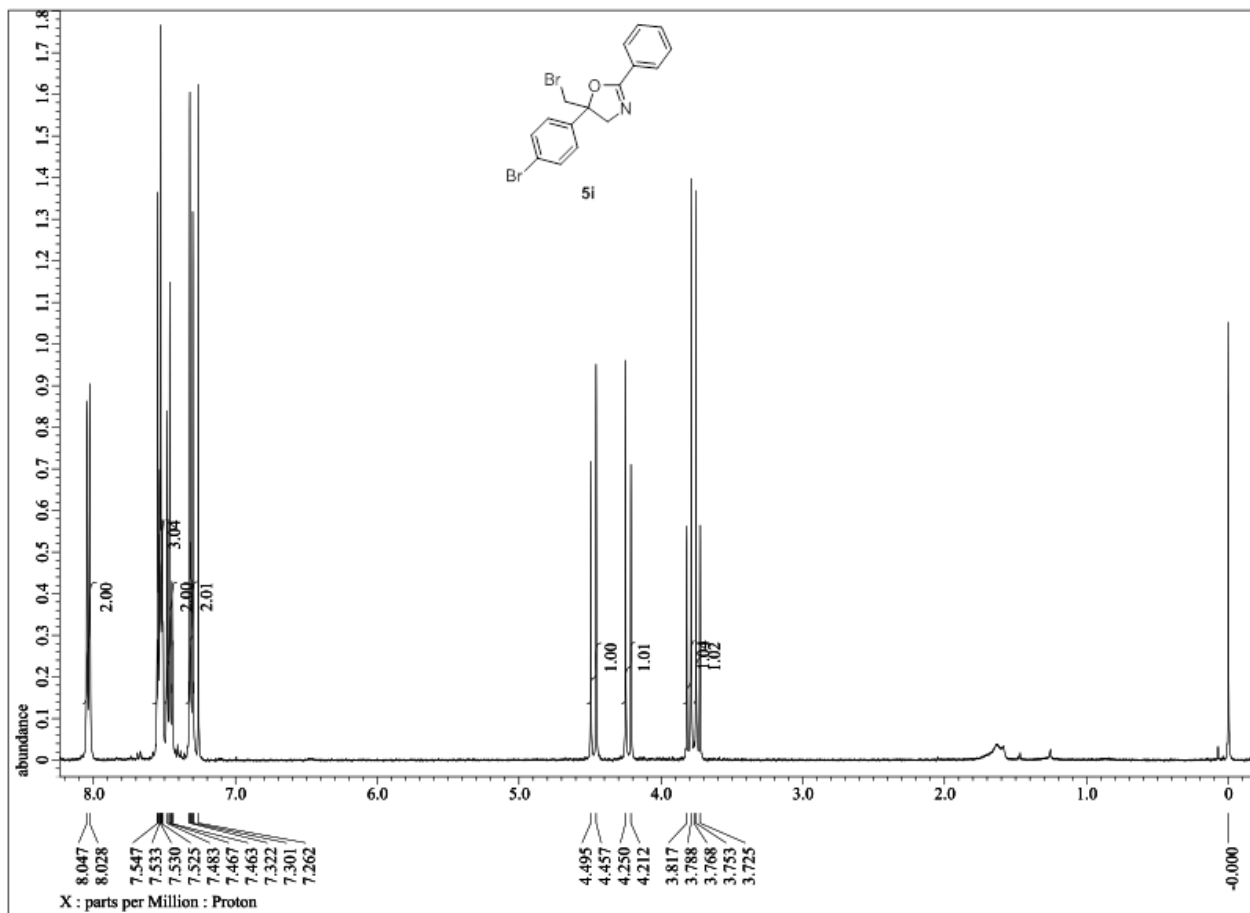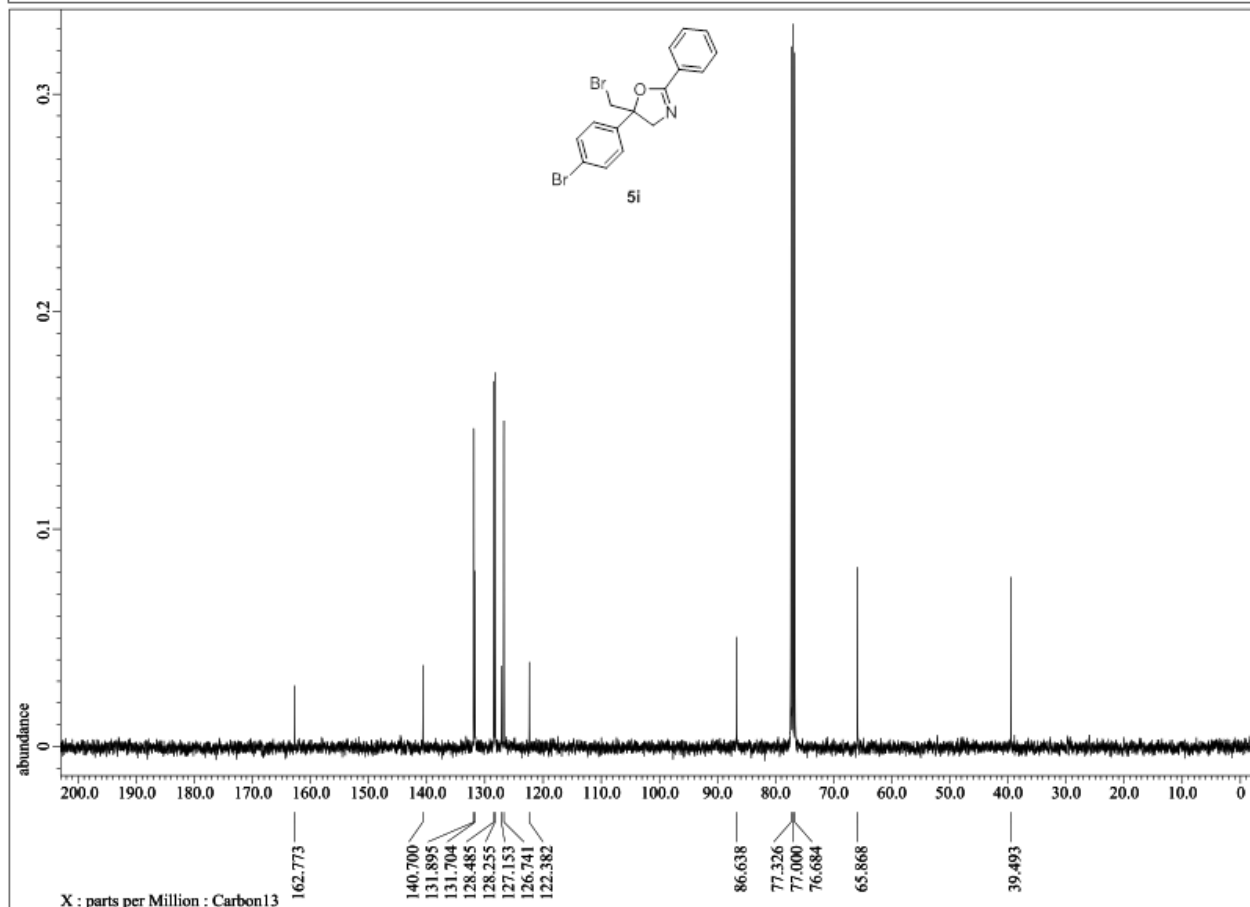

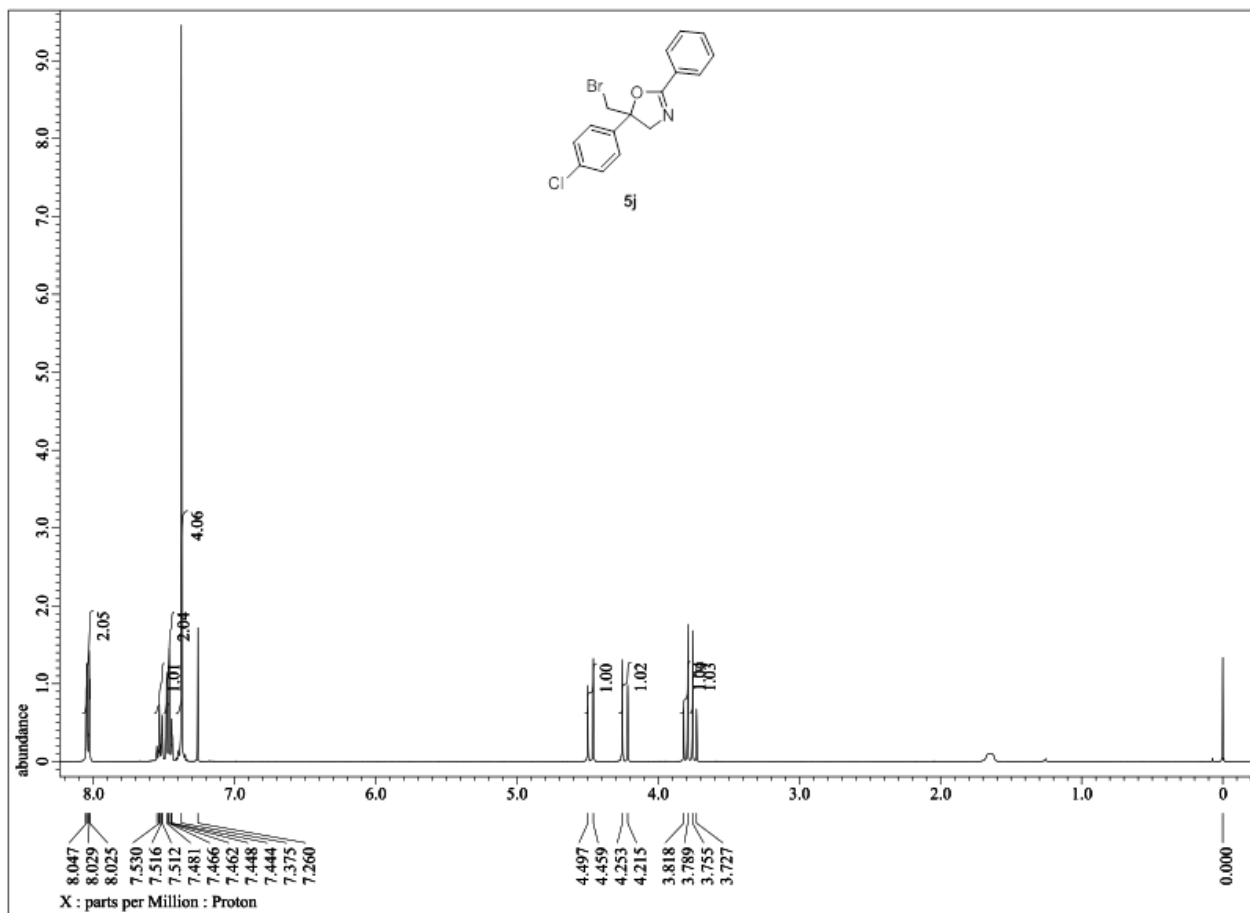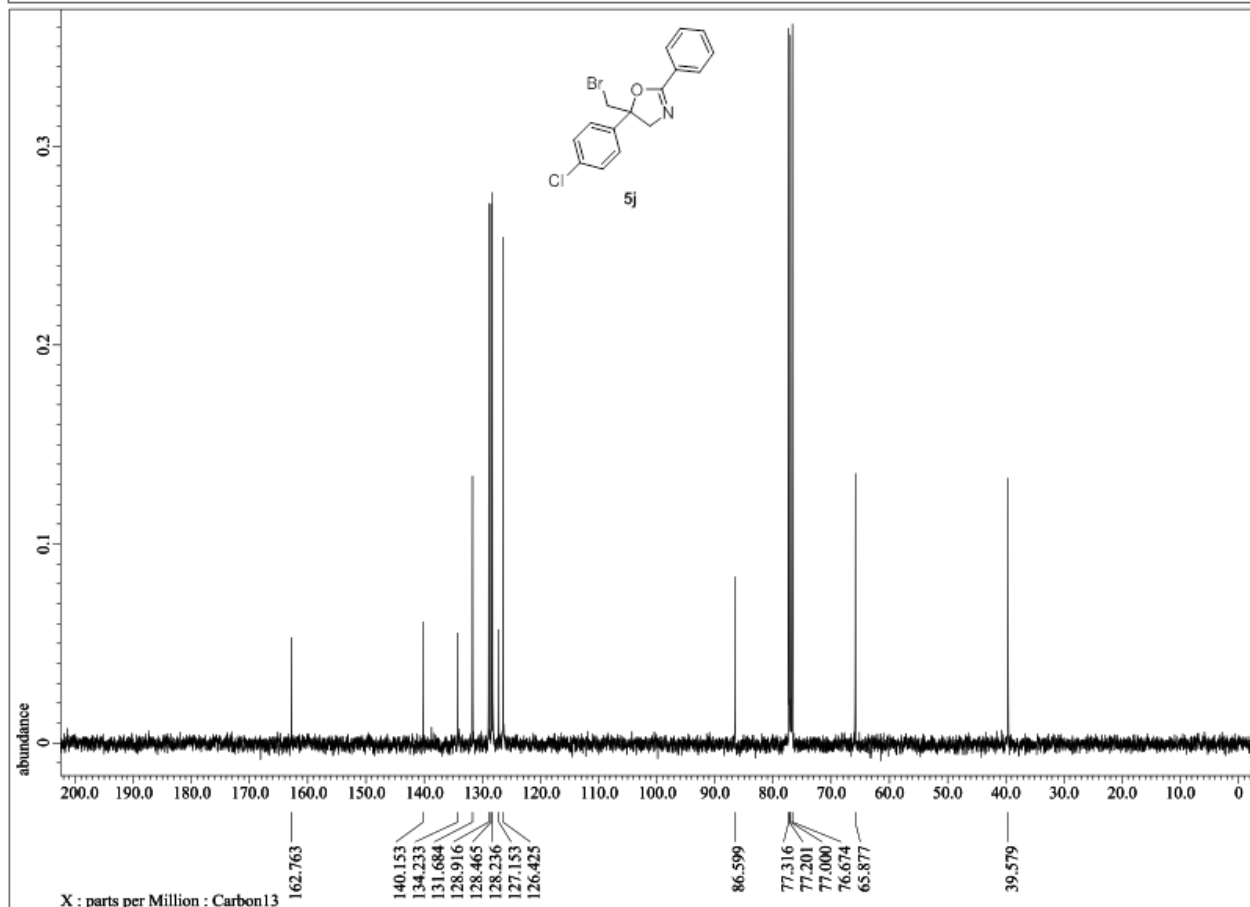



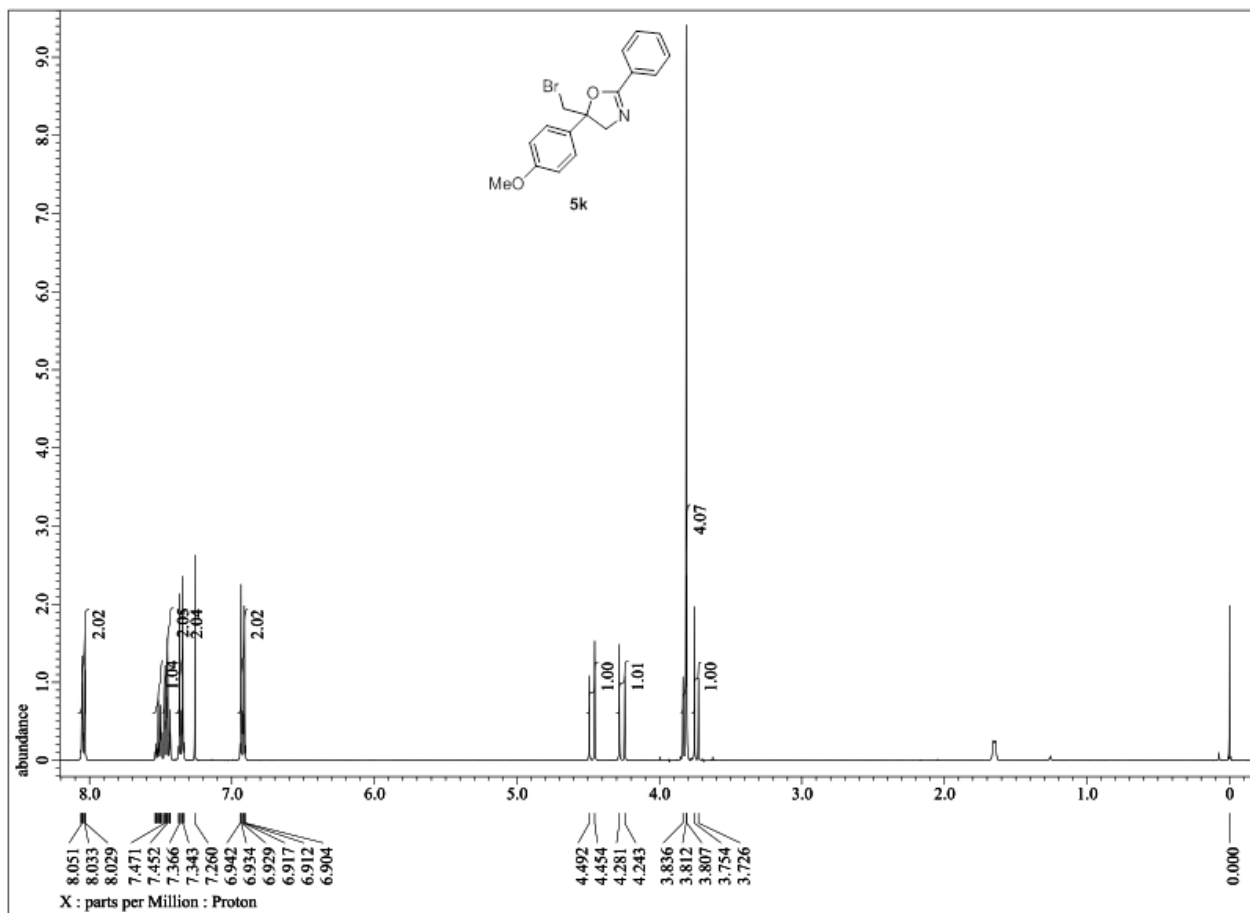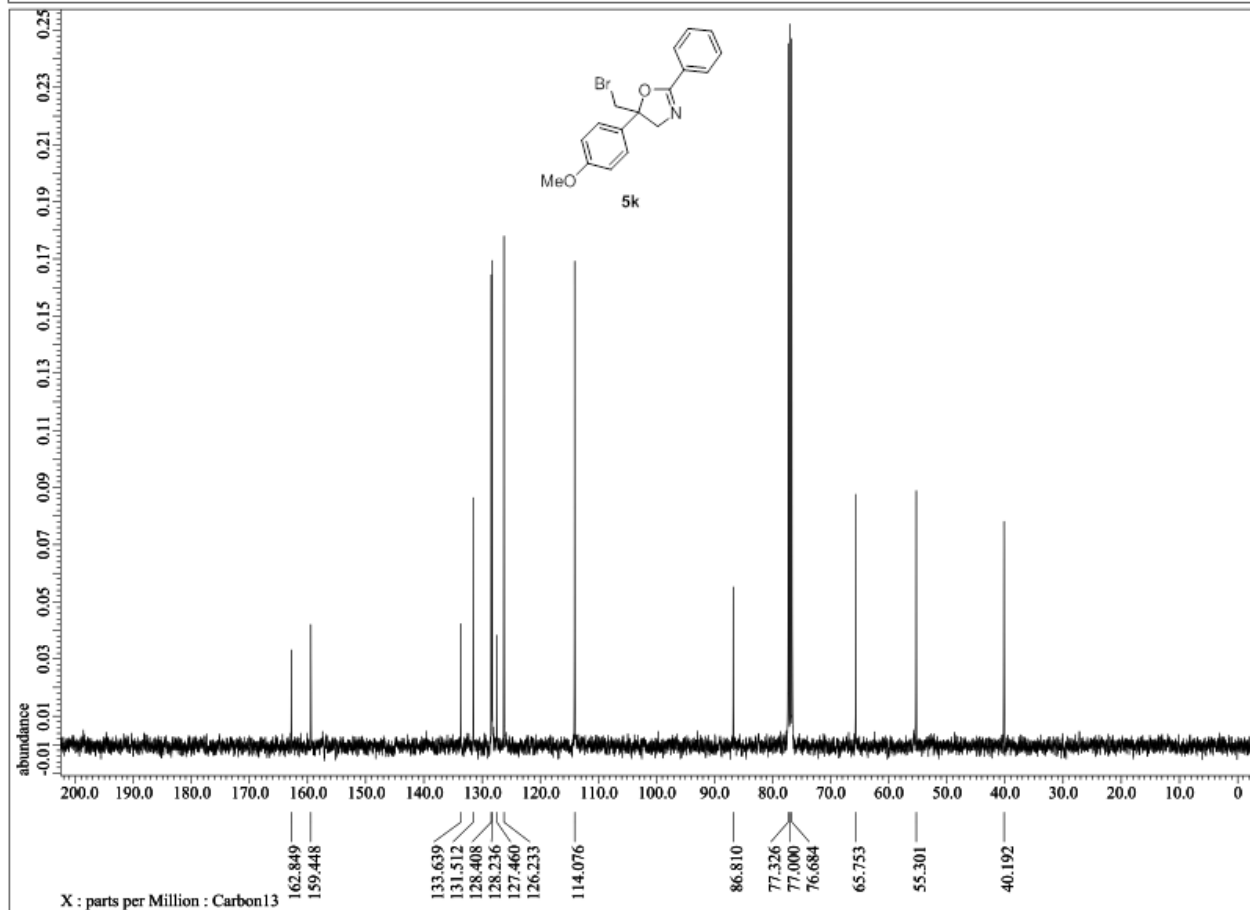

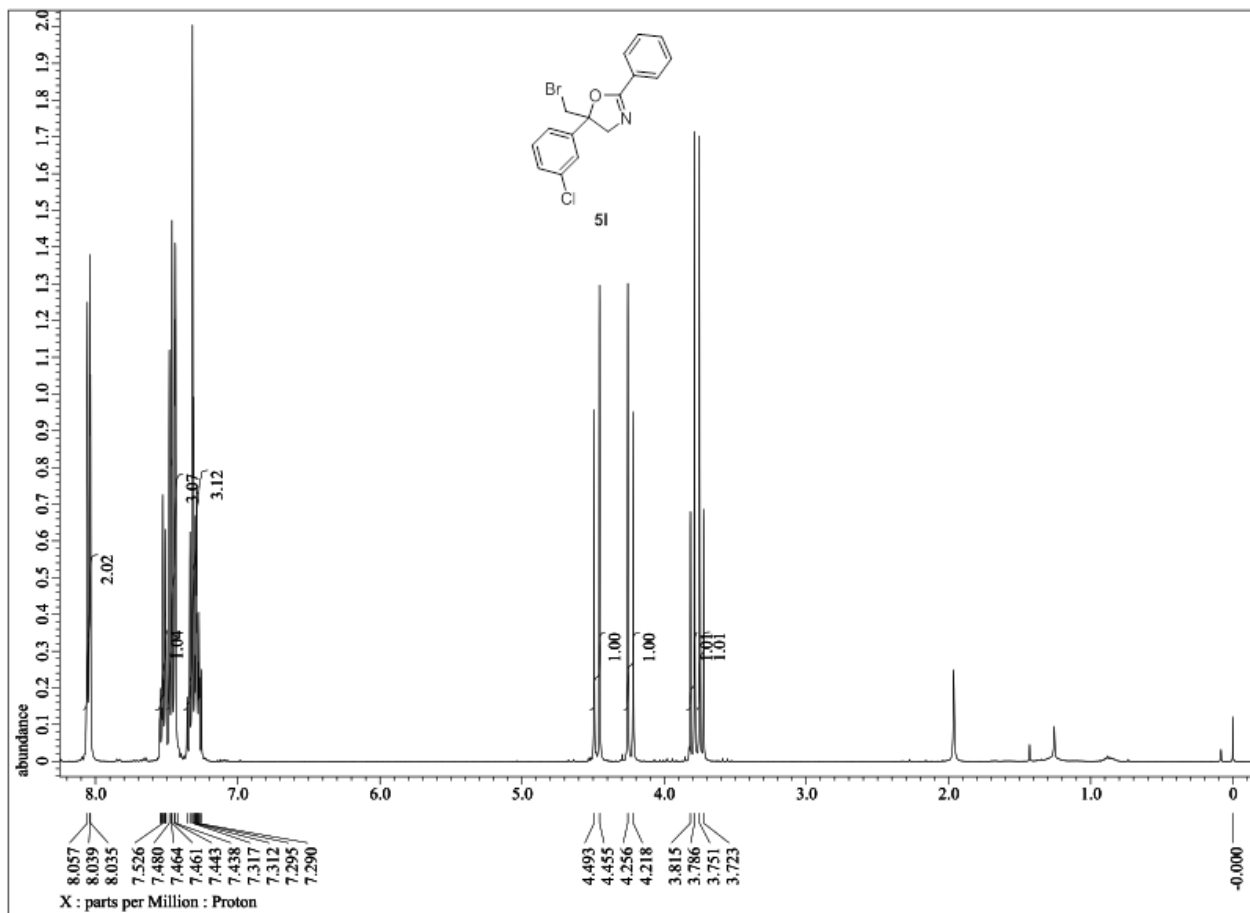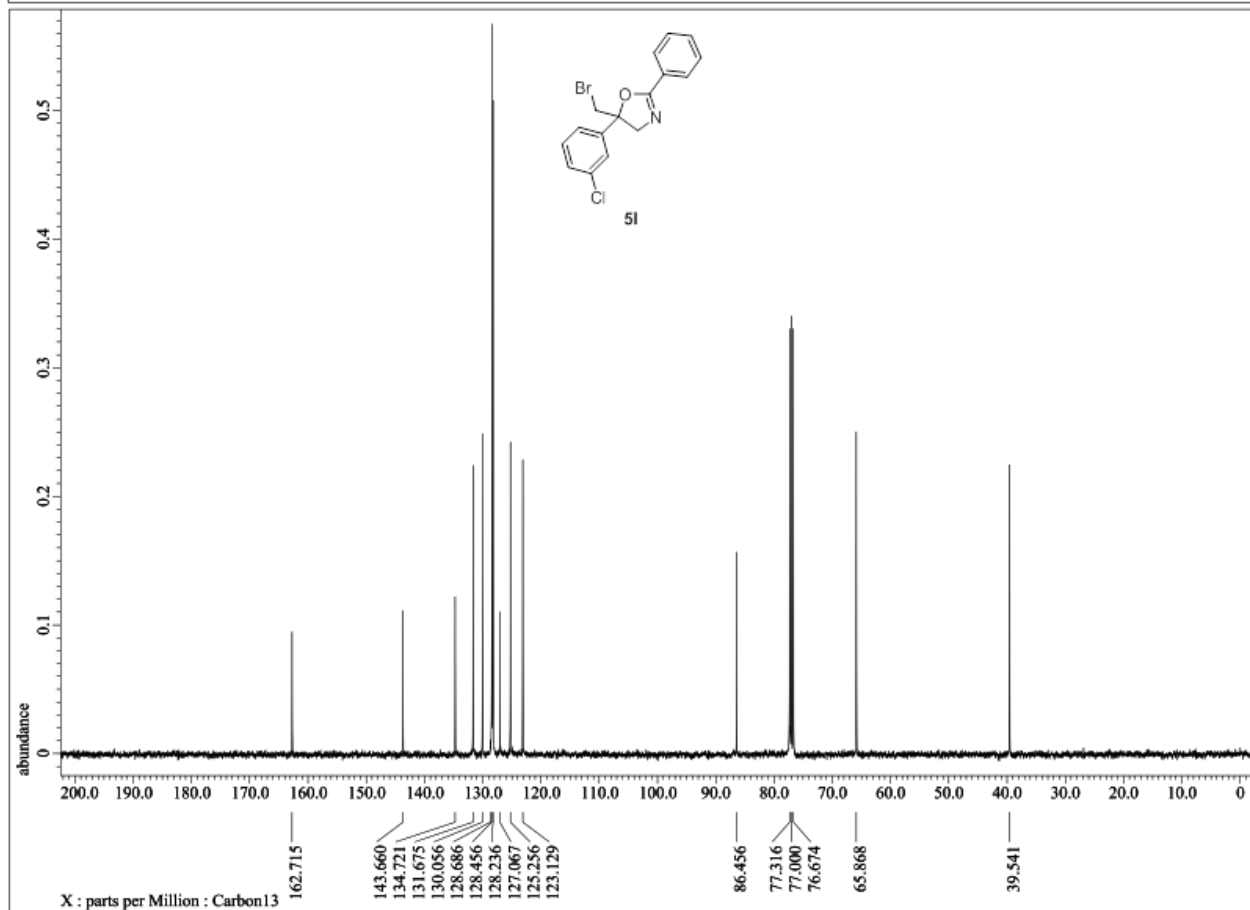

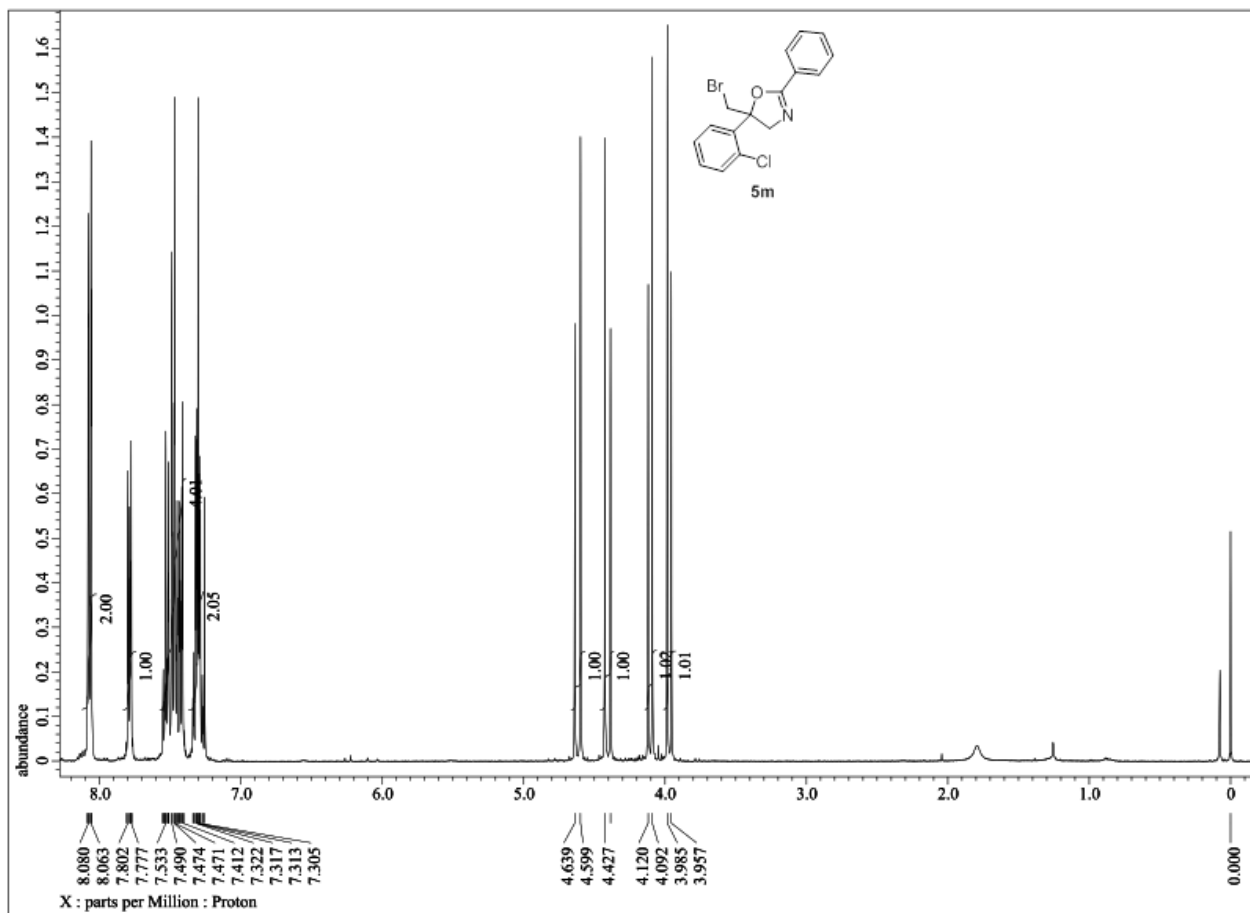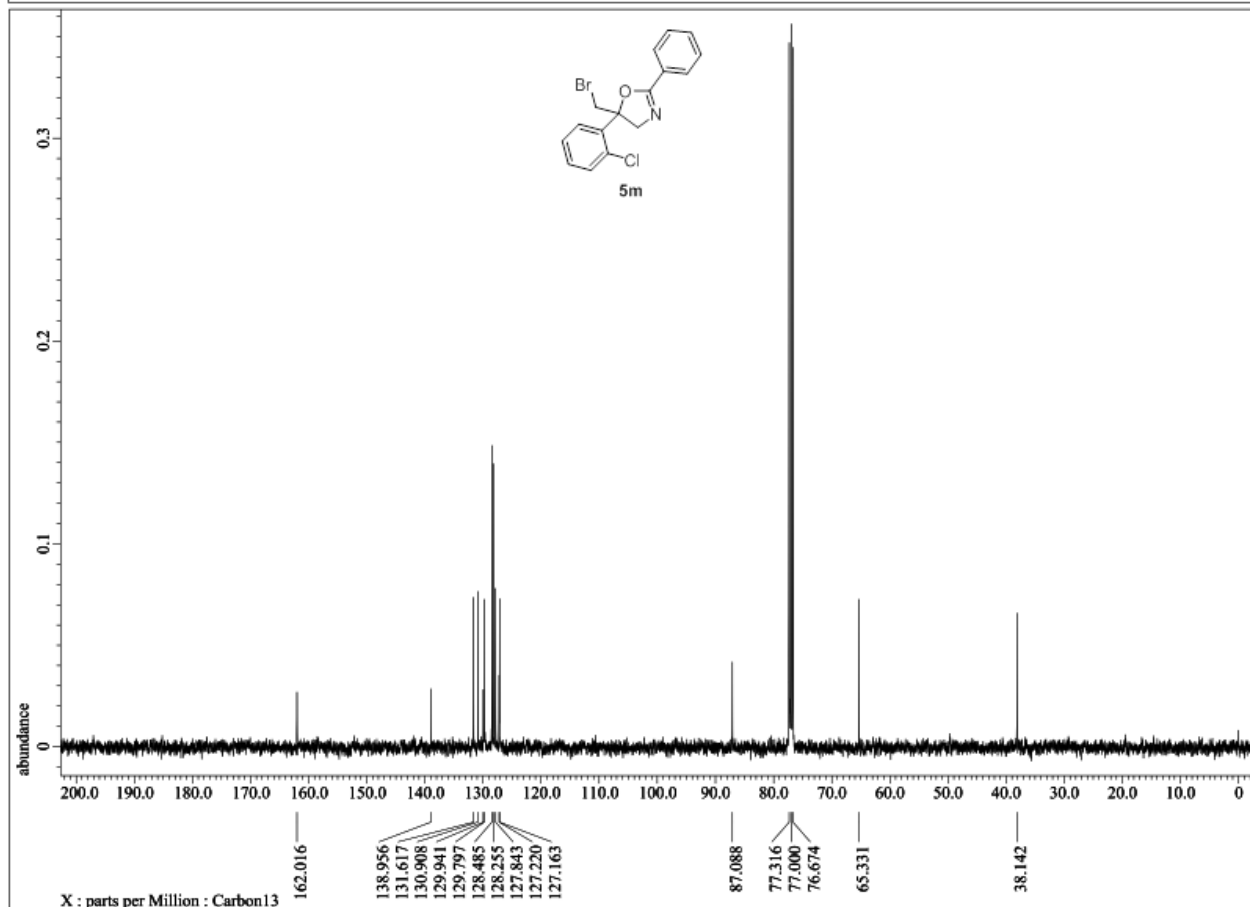

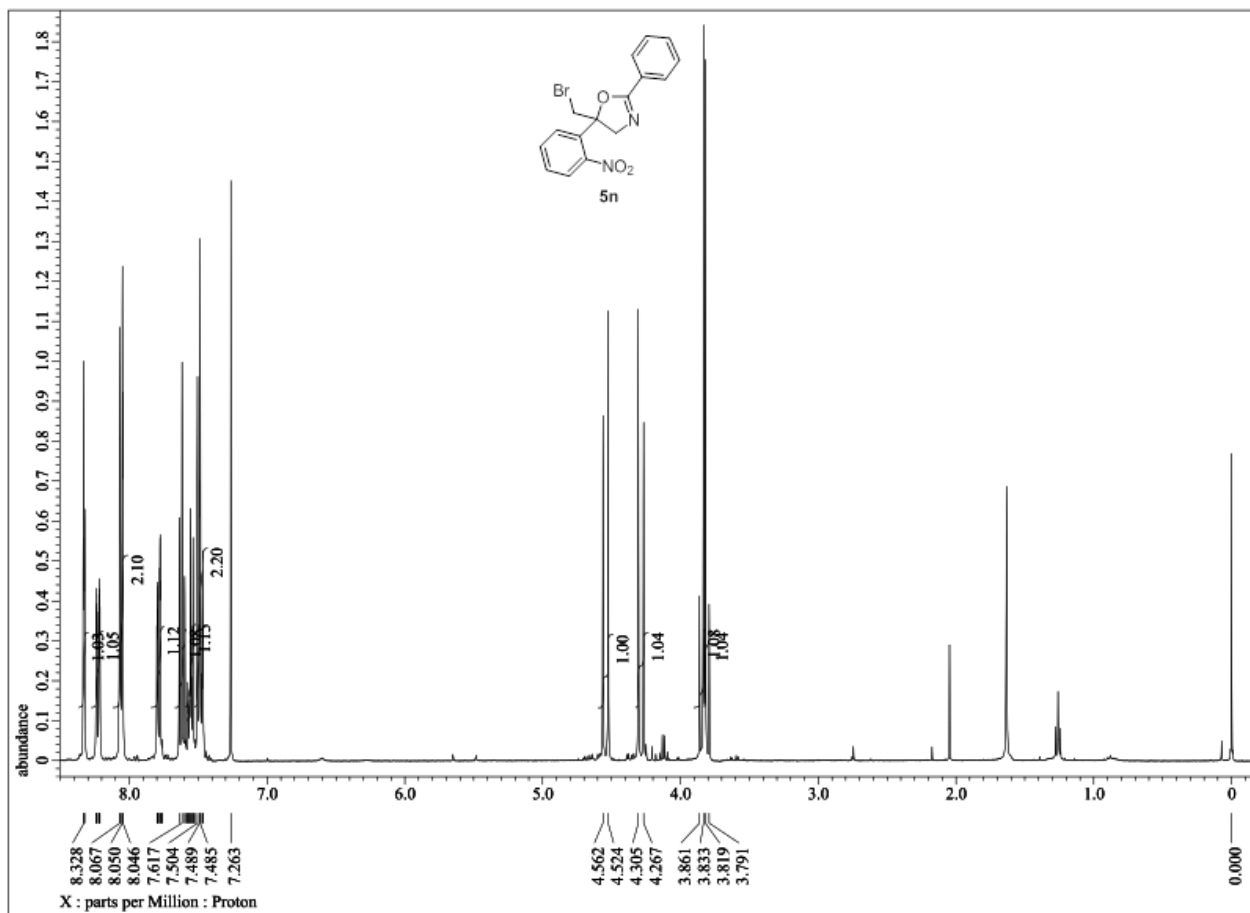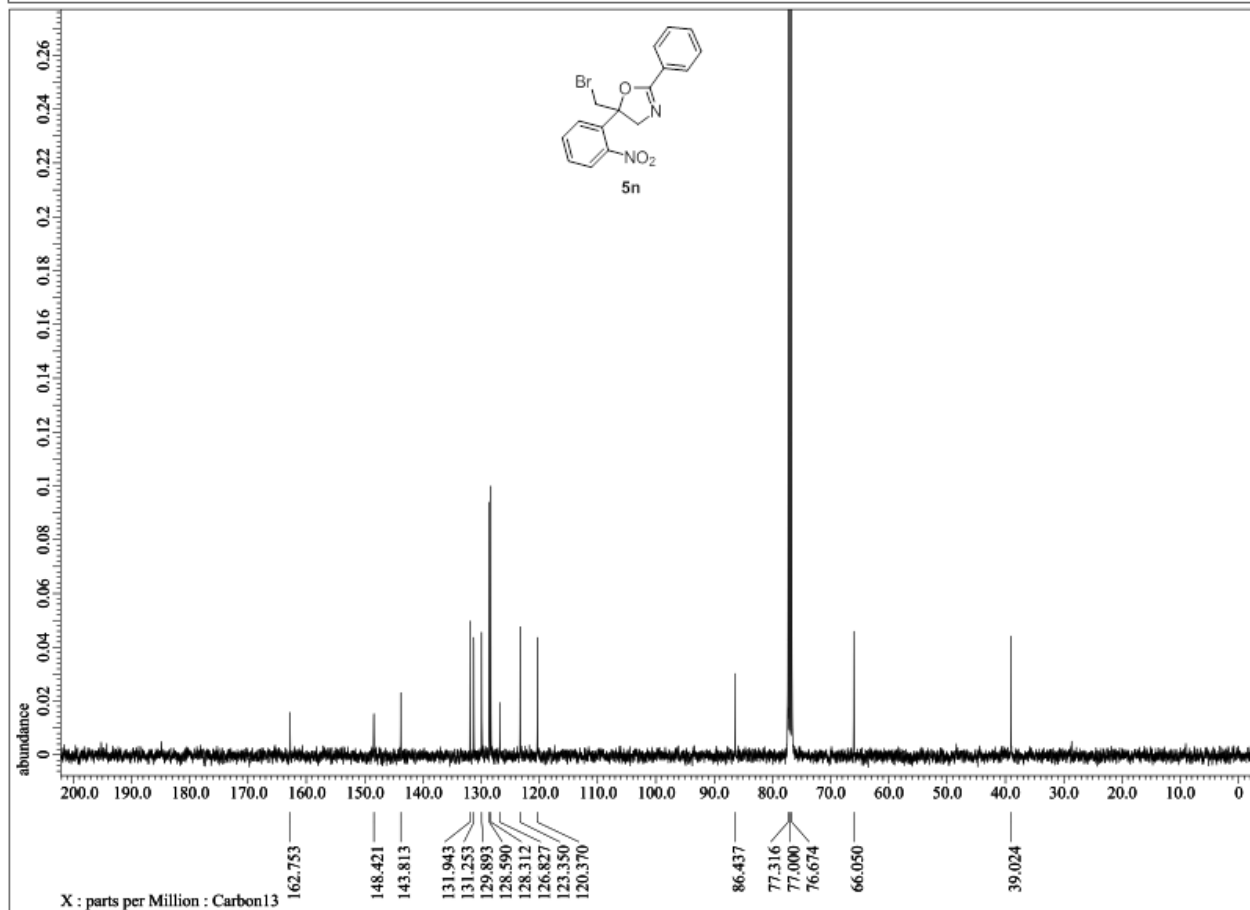

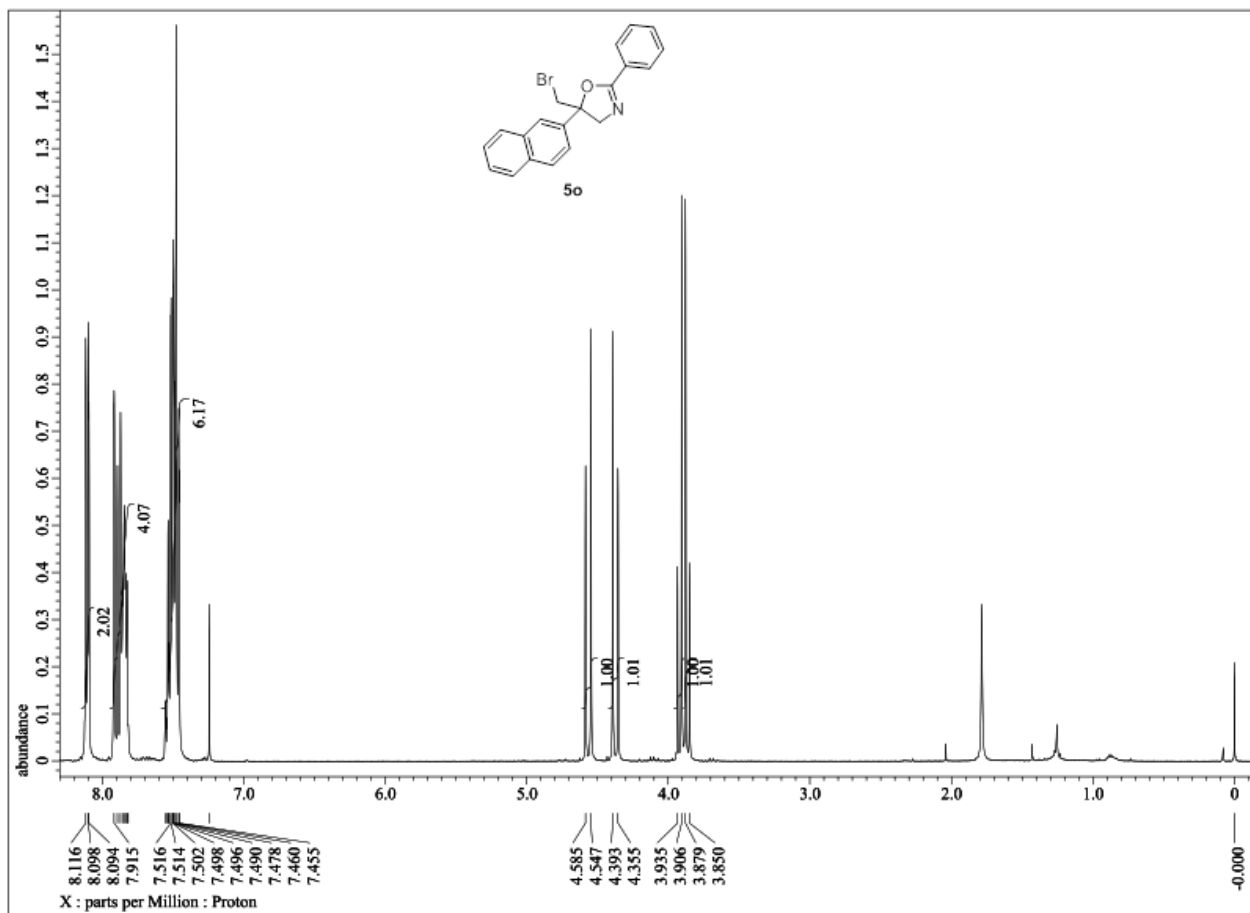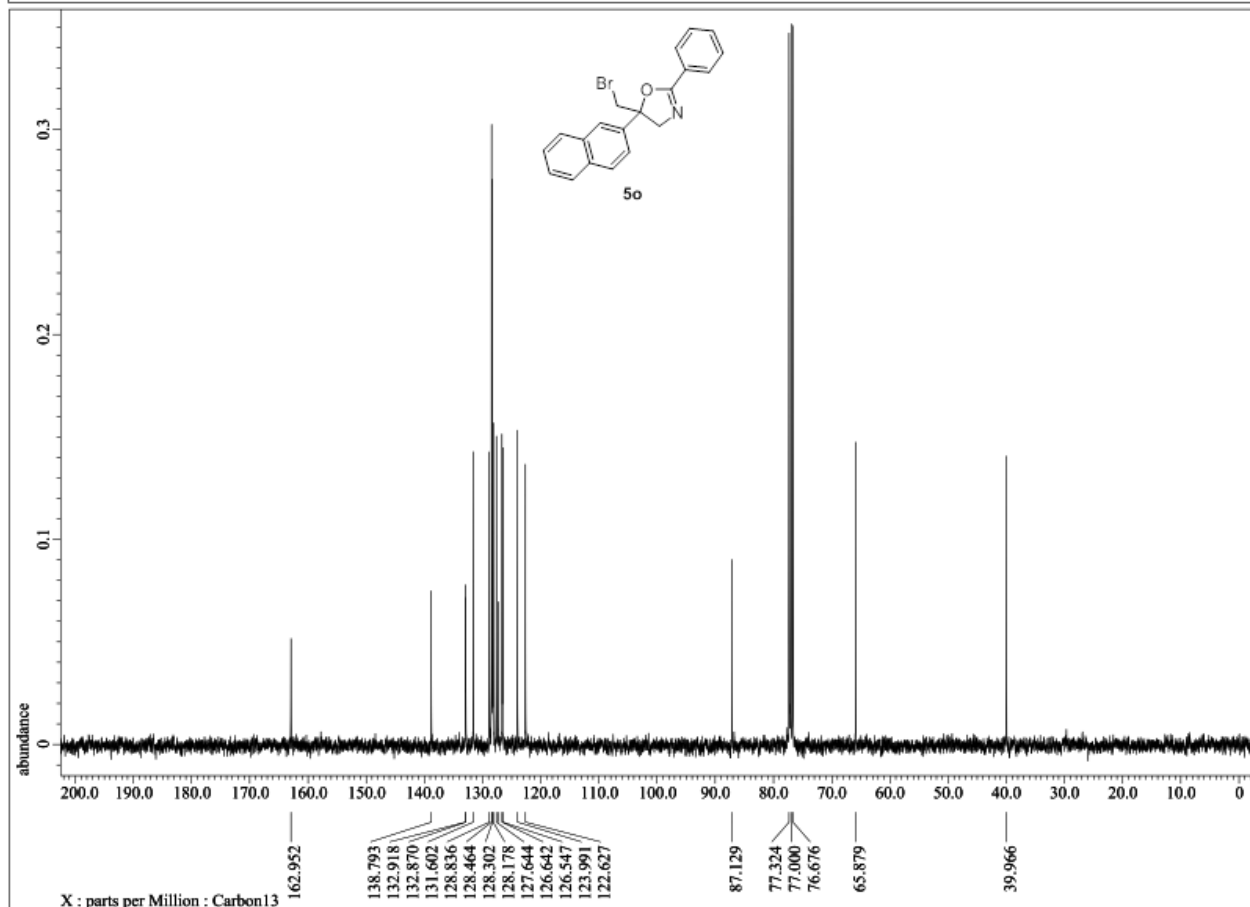

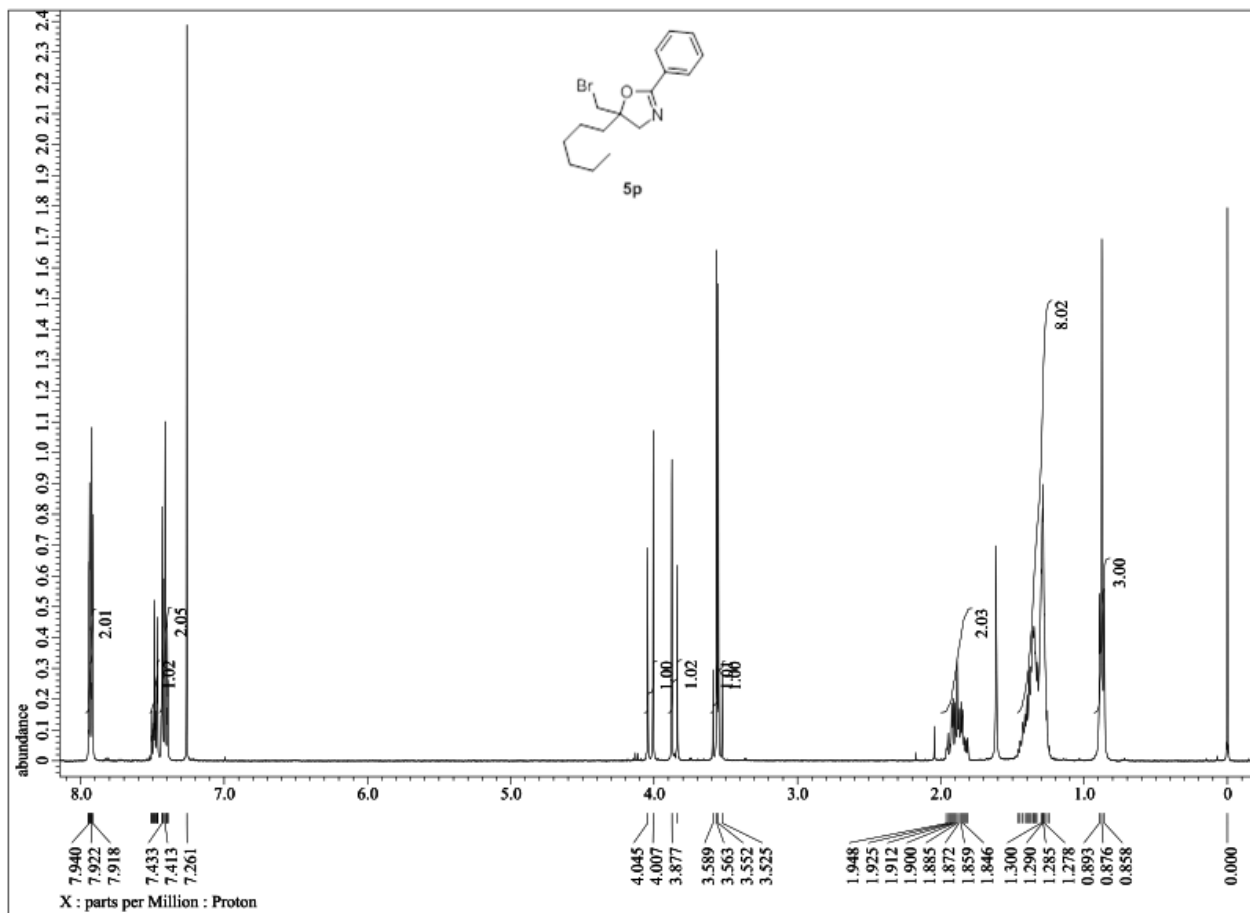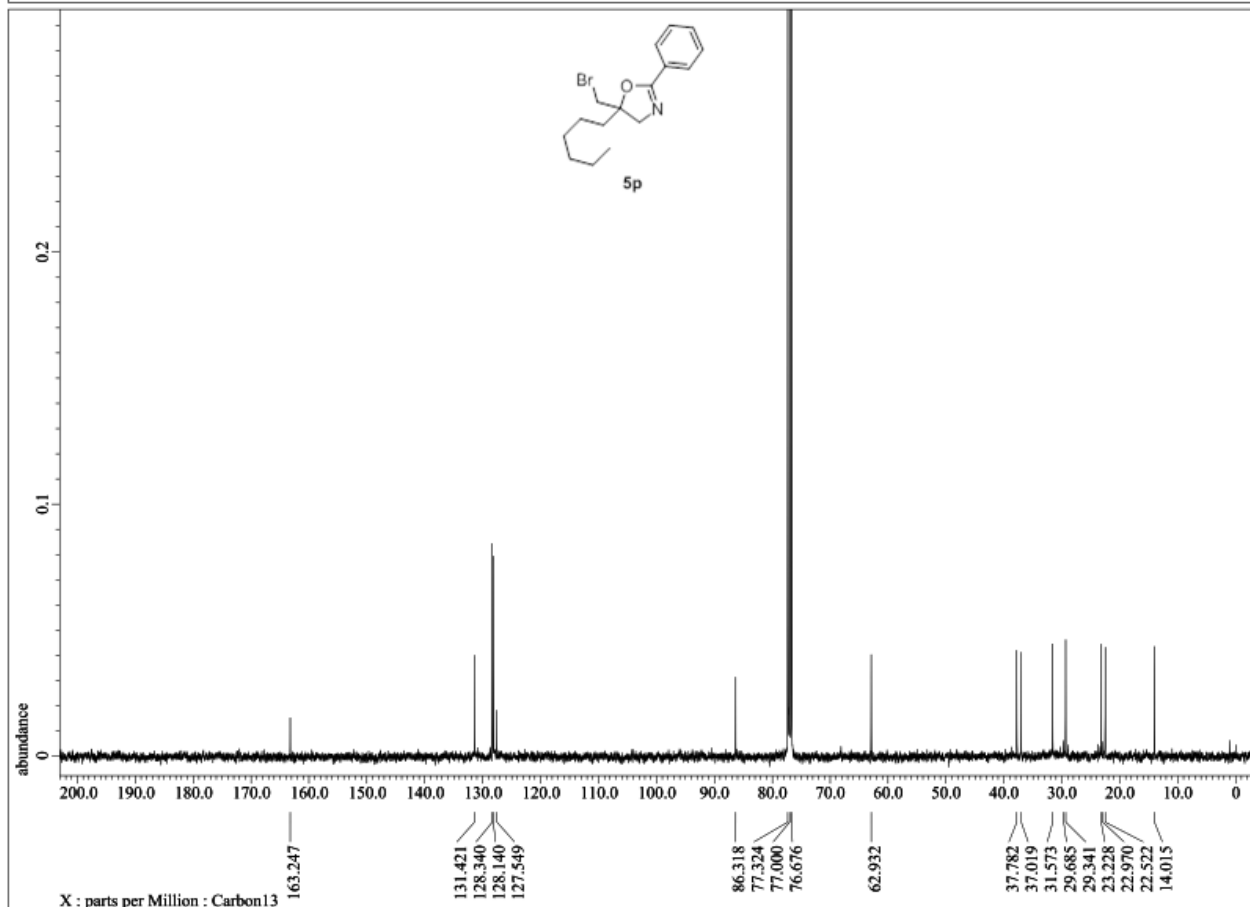

Supplement: c5ra19851h1.pdf [file c5ra19851h1.pdf]
